# Supplementary material
Source: publisher figshare collection journal article supplement (https://acs.figshare.com/ndownloader/files/4485268)
Supplement: Supplementary file 1 [file 4485268]

# **An Efficient Synthesis of $\alpha$ -Ketoamides via 2-Acyl-5-aminooxazoles by Reacting Acyl Chlorides and $\alpha$ -Isocyanoacetamides**

**Riccardo Mossetti,<sup>a</sup> Tracey Pirali,<sup>a,\*</sup> Gian Cesare Tron,<sup>a</sup> and Jieping Zhu<sup>b</sup>**

a) Dipartimento di Scienze Chimiche, Alimentari, Farmaceutiche e Farmacologiche, Università degli Studi del Piemonte Orientale “A. Avogadro”, Via Bovio 6, 28100 Novara, Italy.

b) Institut de Chimie des Substances Naturelles, CNRS, 91198 Gif-sur-Yvette Cedex, France

Contents :

1. Experimental procedures and spectral data for all new compounds.
2. References.
3. Copies of  $^1\text{H}$  and  $^{13}\text{C}$  spectra for all new compounds.
4. Table of elemental analyses for  $\alpha$ -ketoamides.

## Experimental section

Commercially available reagents and solvents were used without further purification. Dichloromethane was dried by distillation from P<sub>2</sub>O<sub>5</sub> and stored on activated molecular sieves (4 Å). When needed, the reactions were performed in oven-dried glassware under a positive pressure of dry nitrogen.

Melting points were determined in open glass capillary with a Stuart scientific SMP3 apparatus and are uncorrected. All the compounds were checked by IR (FT-IR THERMO-NICOLET AVATAR), <sup>1</sup>H and <sup>13</sup>C APT (JEOL ECP 300 MHz), and mass spectrometry (Thermo Finnigan LCQ-deca XP-*plus*) equipped with an ESI source and an ion trap detector. Chemical shifts are reported in part per million (ppm). Column chromatography was performed on silica gel (Merck Kieselgel 70-230 mesh ASTM) using the indicated eluants. Thin layer chromatography (TLC) was carried out on 5 x 20 cm plates with a layer thickness of 0.25 mm (Merck Silica gel 60 F<sub>254</sub>). When necessary they were developed with KMnO<sub>4</sub>.

Elemental Analysis (C, H, N) of all the new compounds are within ± 0.4 % of the calculated values unless otherwise noted.

Acyl chloride **1e** was prepared according to the literature.<sup>1</sup>

### **α-Isocyanoacetamides (2 a-g)**

α-Isocyanoacetamides (**2 a-g**) were prepared according to literature procedure.<sup>2</sup> The methylisocyanoacetate is reacted with the amine to give the α-isocyanoacetamide **2 b, d, e, g**; the subsequent alkylation, in the presence of cesium hydroxide, gives the α-substituted α-isocyanoacetamide **2 a, c, f**.<sup>3</sup> Experimental data for compounds **2 a**,<sup>3</sup> **6b**,<sup>2</sup> **6c**<sup>4</sup> have already been reported.

### **2d**

The product precipitates during the reaction and it is filtered off, washed three times with cold diethyl ether, and dried under vacuum overnight to give a brown solid (85%).  $^1\text{H}$ -NMR (300 MHz,  $25^\circ\text{C}$ ,  $\text{CDCl}_3$ )  $\delta$  7.38-7.22 (m, 5-H), 6.91 (br s, 1-H), 4.44 (d,  $J = 5.8$  Hz, 2-H), 4.12 (s, 2-H);  $^{13}\text{C}$ -NMR (75 MHz,  $25^\circ\text{C}$ ,  $\text{CDCl}_3$ )  $\delta$  161.3, 161.0, 135.8, 127.7, 126.8, 126.7, 44.1, 42.7;  $m/z$  175 ( $\text{M}+\text{H}$ ) $^+$ .

## 2e

The product precipitates during the reaction and it is filtered off, washed three times with cold diethyl ether, and dried under vacuum overnight to give a brown solid (91%).  $^1\text{H}$ -NMR (300 MHz,  $25^\circ\text{C}$ ,  $\text{CDCl}_3$ )  $\delta$  7.39-7.20 (m, 5-H), 4.56 (s, 2-H), 4.33 (s, 2-H), 2.86 (s, 3-H);  $^{13}\text{C}$ -NMR (75 MHz,  $25^\circ\text{C}$ ,  $\text{CDCl}_3$ )  $\delta$  161.3, 135.0, 128.2, 127.7, 127.1, 125.1, 50.6, 43.5, 33.2;  $m/z$  189 ( $\text{M}+\text{H}$ ) $^+$ .

## 2f

The crude of the alkylation reaction is purified by column chromatography using PE/EtOAc 7:3 as eluant to give a yellow oil (76%).  $^1\text{H}$ -NMR (300 MHz,  $25^\circ\text{C}$ ,  $\text{CDCl}_3$ )  $\delta$  7.40-7.11 (m, 5-H), 4.63-4.47 (m, 3-H), 2.98 (s, 3-H), 1.60 (d,  $J = 6.6$  Hz, 3-H);  $^{13}\text{C}$ -NMR (75 MHz,  $25^\circ\text{C}$ ,  $\text{CDCl}_3$ )  $\delta$  165.1, 158.1, 135.6, 134.8, 127.6, 125.7, 51.2, 49.2, 34.3, 18.1;  $m/z$  203 ( $\text{M}+\text{H}$ ) $^+$ .

## 2g

The crude material is purified by column chromatography using PE/EtOAc 7:3 as eluant to give a brown solid (98%).  $^1\text{H}$ -NMR (300 MHz,  $25^\circ\text{C}$ ,  $\text{CDCl}_3$ )  $\delta$  6.54 (br s, 1-H), 4.12 (s, 2-H), 3.28 (q,  $J = 6.8$  Hz, 2-H), 1.50 (quint,  $J = 6.8$  Hz, 2-H), 1.32 (sext,  $J = 7.9$  Hz, 2-H), 0.90 (t,  $J = 7.4$  Hz, 3-H);  $^{13}\text{C}$ -NMR (75 MHz,  $25^\circ\text{C}$ ,  $\text{CDCl}_3$ )  $\delta$  161.1, 160.8, 44.1, 38.6, 30.1, 18.8, 12.5;  $m/z$  141 ( $\text{M}+\text{H}$ ) $^+$ .

**General procedure for the preparation of 2-acyl-5-aminooxazoles 5 (a-l):**

To a solution of  $\alpha$ -isocyanoacetamide (1 eq) in dry dichloromethane, triethylamine (1 eq) is added under nitrogen atmosphere. A solution of acyl chloride (1 eq) in dry dichloromethane is added dropwise in a period of ten minutes and the reaction is stirred at room temperature for 1 hour. The reaction is diluted with dichloromethane and washed with  $\text{Na}_2\text{CO}_3$  sat. aq. (x 1). The organic phase is dried over sodium sulphate and evaporated. The crude material is then purified by column chromatography by using petroleum ether/EtOAc as eluant to give the 2-acyl-5-aminooxazole.

**5a, 1-[5-(4-morpholinyl)-4-(phenylmethyl)-2-oxazolyl]-1-hexanone**

The crude material is purified by column chromatography, using petroleum ether/EtOAc 9:1 as eluant to give a white solid (75%); IR (neat) 1658, 1605, 1530, 1475, 1280  $\text{cm}^{-1}$ ;  $^1\text{H}$ -NMR (300 MHz,  $\text{CDCl}_3$ )  $\delta$  7.32-7.14 (m, 5-H), 3.94 (s, 1-H), 3.70-3.63 (m, 4-H), 3.22-3.17 (m, 4-H), 2.93 (t,  $J = 7.4$  Hz, 2-H), 1.70 (quint,  $J = 7.4$  Hz, 2-H), 1.38-1.28 (m, 4-H), 0.88 (t,  $J = 6.9$  Hz, 3-H);  $^{13}\text{C}$ -NMR (75 MHz,  $\text{CDCl}_3$ )  $\delta$  187.0, 154.4, 150.3, 138.9, 128.6, 128.2, 126.5, 120.5, 66.3, 48.6, 38.0, 32.7, 31.4, 24.1, 22.5, 14.0; Mp = 91-92  $^\circ\text{C}$ .

**5b, 1-[5-(4-morpholinyl)-4-(phenylmethyl)-2-oxazolyl]-3-phenyl-1-propanone**

The crude material was purified by column chromatography, by using petroleum ether/EtOAc 9:1 as eluant to give a yellow solid (50%); IR (neat) 1658, 1610, 1548, 1492, 1105  $\text{cm}^{-1}$ ;  $^1\text{H}$ -NMR (300 MHz, 25 $^\circ\text{C}$ ,  $\text{CDCl}_3$ )  $\delta$  7.30-7.15 (m, 10-H), 3.95 (s, 2-H), 3.68 (br t, 4-H), 3.30 (t,  $J = 7.3$  Hz, 2-H), 3.23 (br t, 4-H), 3.04 (t,  $J = 7.3$  Hz, 2-H);  $^{13}\text{C}$ -NMR (75 MHz, 25 $^\circ\text{C}$ ,  $\text{CDCl}_3$ )  $\delta$  185.2, 149.5, 149.2, 140.3, 138.3, 128.1, 128.0, 127.9, 127.6, 126.0, 125.6, 120.0, 65.8, 48.0, 39.1, 32.2, 29.6.; Mp = 98-99  $^\circ\text{C}$ .

**5c, 1-[5-(4-morpholinyl)-4-(phenylmethyl)-2-oxazolyl]-1-propanone**



The crude material was purified by column chromatography, by using petroleum ether/EtOAc 95:5 as eluant to give a colorless oil (73%); IR (neat) 1658, 1610, 1498, 1483, 1110  $\text{cm}^{-1}$ ;  $^1\text{H}$ -NMR (300 MHz, 25°C,  $\text{CDCl}_3$ )  $\delta$  7.32-7.12 (m, 5-H), 3.93 (s, 2-H), 3.68-3.62 (m, 4-H), 3.22-3.16 (m, 4-H), 2.95 (quart,  $J = 7.4$  Hz, 2-H), 1.17 (t,  $J = 7.4$  Hz, 3-H);  $^{13}\text{C}$ -NMR (75 MHz, 25°C,  $\text{CDCl}_3$ )  $\delta$  187.0, 153.8, 149.6, 138.3, 128.1, 127.6, 126.0, 120.1, 65.8, 48.1, 32.1, 30.8, 7.7.

**5d, 1-[5-(methyl2-propynylamino)-4-(phenylmethyl)-2-oxazolyl]-1-hexanone**

The crude material was purified by column chromatography, by using petroleum ether/EtOAc 95:5 as eluant to give a yellow solid (73%); IR (neat) 3305, 1670, 1610, 1535, 1500, 980  $\text{cm}^{-1}$ ;  $^1\text{H}$ -NMR (300 MHz, 25°C,  $\text{CDCl}_3$ )  $\delta$  7.28-7.12 (m, 5-H), 3.91 (s, 2-H), 3.79 (d,  $J = 2.5$  Hz, 2-H), 2.88 (s, 3-H), 2.83 (t,  $J = 7.4$  Hz, 2-H), 2.23 (t,  $J = 2.5$  Hz, 1-H), 1.61 (quint,  $J = 7.4$  Hz, 2-H), 1.25-1.18 (m, 4-H), 0.81-0.77 (br t, 3-H);  $^{13}\text{C}$ -NMR (75 MHz, 25°C,  $\text{CDCl}_3$ )  $\delta$  186.4, 154.0, 149.7, 139.1, 128.3, 127.8, 126.1, 119.3, 77.8, 73.5, 42.3, 37.6, 37.5, 32.2, 31.1, 23.8, 22.1, 13.6.; Mp = 77-78 °C.

**5e, 1-[4-methyl-5-[methyl(phenylmethyl)amino]-2-oxazolyl]-3-phenyl-1-propanone**

The crude material was purified by column chromatography, by using petroleum ether/EtOAc 95:5 as eluant to give a yellow solid (70%); IR (neat) 1670, 1604, 1540, 1502, 984  $\text{cm}^{-1}$ ;  $^1\text{H}$ -NMR (300 MHz, 25°C,  $\text{CDCl}_3$ )  $\delta$  7.39-7.13 (m, 10-H), 4.46 (s, 1-H), 3.27 (m, 2-H), 3.05 (m, 2-H), 2.97 (s, 3-H), 2.23 (s, 3-H);  $^{13}\text{C}$ -NMR (75 MHz, 25°C,  $\text{CDCl}_3$ )  $\delta$  184.1, 154.7, 148.3, 140.7, 136.3, 128.4, 128.1, 128.0, 127.4, 127.2, 125.6, 114.7, 55.9, 38.9, 37.0, 29.9, 12.5; Mp = 89-90 °C.

**5f, 1-[5-[methyl(phenylmethyl)amino]-2-oxazolyl]-1-propanone**

The crude material was purified by column chromatography, by using petroleum ether/EtOAc 95:5 as eluant to give a yellow solid (55%); IR (neat) 1672, 1600, 1532, 1483, 1075  $\text{cm}^{-1}$ ;  $^1\text{H}$ -NMR (300 MHz, 25°C,  $\text{CDCl}_3$ )  $\delta$  7.33-7.14 (m, 5-H), 6.09 (s, 1-H), 4.46 (s, 2-H), 2.99-2.84 (m, 5-H), 1.17 (t,  $J$

= 7.4 Hz, 3-H);  $^{13}\text{C}$ -NMR (75 MHz, 25°C,  $\text{CDCl}_3$ )  $\delta$  186.2, 159.1, 135.7, 128.7, 128.5, 127.8, 127.6, 102.4, 54.9, 35.9, 30.9, 8.5; Mp = 70-71 °C.

**5g, 3-cyclopentyl-1-[5-[(phenylmethyl)amino]-2-oxazolyl]-1-propanone**

The crude material was purified by column chromatography, by using petroleum ether/EtOAc 95:5 as eluant to give a yellow solid (76%). IR (neat) 3282, 1661, 1601, 1521, 1483, 1070  $\text{cm}^{-1}$ ;  $^1\text{H}$ -NMR (300 MHz, 25°C,  $\text{CDCl}_3$ )  $\delta$  7.33-7.23 (m, 5-H), 6.08 (s, 1-H), 5.88 (t,  $J$  = 6.0, 1-H), 4.39 (d,  $J$  = 6.0, 2-H), 2.89 (t,  $J$  = 7.7 Hz, 2-H), 1.80-1.43 (m, 11-H);  $^{13}\text{C}$ -NMR (75 MHz, 25°C,  $\text{CDCl}_3$ )  $\delta$  186.2, 157.8, 149.3, 136.8, 128.3, 127.3, 126.8, 102.4, 47.4, 39.3, 36.5, 32.0, 30.4, 29.2, 24.7; Mp = 87-88 °C.

**5h, 1-[5-[(phenylmethyl)amino]-2-oxazolyl]-1-hexanone**

The crude material was purified by column chromatography, by using petroleum ether/EtOAc 9:1 as eluant to give a yellow solid (73%); IR (neat) 3280, 1659, 1608, 1532, 1469, 1069  $\text{cm}^{-1}$ ;  $^1\text{H}$ -NMR (300 MHz, 25°C,  $\text{CDCl}_3$ )  $\delta$  7.34-7.22 (m, 5-H), 6.07 (s, 1-H), 5.98 (br t, 1-H), 4.38 (d,  $J$  = 6.0 Hz, 2-H), 2.86 (t,  $J$  = 7.4 Hz, 2-H), 1.65 (quint,  $J$  = 7.4 Hz, 2-H), 1.36-1.23 (m, 4-H), 0.86 (t,  $J$  = 6.9 Hz, 3-H);  $^{13}\text{C}$ -NMR (75 MHz, 25°C,  $\text{CDCl}_3$ )  $\delta$  186.1, 157.9, 149.3, 136.8, 128.2, 127.3, 126.8, 102.4, 47.4, 37.1, 30.9, 23.9, 21.9, 13.4; Mp = 95-96 °C.

**5i, 1-[5-(2-propynylamino)-2-oxazolyl]-1-hexanone**

The crude material was purified by column chromatography, by using petroleum ether/EtOAc 95:5 as eluant to give a yellow solid (71%); IR (neat) 3307, 3281, 1660, 1602, 1546, 1495, 1105  $\text{cm}^{-1}$ ;  $^1\text{H}$ -NMR (300 MHz, 25°C,  $\text{CDCl}_3$ )  $\delta$  6.25 (s, 1-H), 6.08 (br t, 1-H), 3.98 (br d, 2-H), 2.85 (t,  $J$  = 7.4 Hz, 2-H), 2.23 (s, 1-H), 1.63 (br quint,  $J$  = 7.1 Hz, 2-H), 1.30-1.15 (m, 4-H), 0.83 (br t, 3-H);  $^{13}\text{C}$ -

NMR (75 MHz, 25°C, CDCl<sub>3</sub>)  $\delta$  186.9, 157.5, 150.2, 103.6, 77.4, 72.2, 37.5, 33.2, 31.2, 24.2, 22.2, 13.7; Mp = 70-71 °C.

#### **5j, 1-[5-(2-propynylamino)-2-oxazolyl]-1-propanone**

The crude material was purified by column chromatography, by using petroleum ether/EtOAc 9:1 as eluant to give a yellow solid (51%); IR (neat) 1661, 1601, 1521, 1483, 1070 cm<sup>-1</sup>; <sup>1</sup>H-NMR (300 MHz, 25°C, CDCl<sub>3</sub>)  $\delta$  6.29 (s, 1-H), 5.31 (br t, 1-H), 4.00 (dd, *J* = 6.0 Hz, 2.5 Hz, 2-H), 2.95 (quart, *J* = 7.4 Hz, 2-H), 2.29 (t, *J* = 2.5 Hz, 1-H), 1.19 (t, *J* = 7.4 Hz, 3-H); <sup>13</sup>C-NMR (75 MHz, 25°C, CDCl<sub>3</sub>)  $\delta$  186.9, 156.6, 149.8, 103.4, 72.2, 33.1, 30.6, 29.2, 7.8; Mp = 99-100 °C.

#### **5k, 3-cyclopentyl-1-[5-(pentylamino)-2-oxazolyl]-1-propanone**

The crude material was purified by column chromatography, by using petroleum ether/EtOAc 95:5 as eluant to give a yellow solid (83%); IR (neat) 3315, 1678, 1608, 1520, 1302, 1109 cm<sup>-1</sup>; <sup>1</sup>H-NMR (300 MHz, 25°C, CDCl<sub>3</sub>)  $\delta$  6.08 (s, 1-H), 5.41 (br t, 1-H), 3.15 (quart, *J* = 6.7 Hz, 2-H), 2.87 (t, *J* = 7.4 Hz, 2-H), 1.8-1.0 (m, 15-H), 0.88 (t, *J* = 7.4 Hz, 3-H); <sup>13</sup>C-NMR (75 MHz, 25°C, CDCl<sub>3</sub>)  $\delta$  185.8, 158.2, 149.1, 101.5, 43.2, 39.3, 36.3, 32.0, 30.8, 29.1, 24.6, 19.4, 13.1; Mp = 70-71 °C.

#### **5l, 1-[5-(butylamino)-2-oxazolyl]-1-hexanone**

The crude material was purified by column chromatography, by using petroleum ether/EtOAc 95:5 as eluant to give a yellow solid (71%); IR (neat) 3284, 1671, 1602, 1558, 1482, 1100 cm<sup>-1</sup>; <sup>1</sup>H-NMR (300 MHz, 25°C, CDCl<sub>3</sub>)  $\delta$  6.06 (s, 1-H), 5.52 (br t, 1-H), 3.14 (quart, *J* = 6.6 Hz, 2-H), 2.83 (t, *J* = 7.4 Hz, 2-H), 1.68-1.50 (m, 4-H), 1.38-1.14 (m, 6-H), 0.90-0.72 (m, 6-H); <sup>13</sup>C-NMR (75 MHz, 25°C, CDCl<sub>3</sub>)  $\delta$  185.7, 158.4, 149.2, 101.6, 43.3, 37.0, 31.0, 30.9, 24.1, 22.0, 19.5, 13.4, 13.2; Mp = 89-90 °C.

**5m, hexanoic acid, (Z)-1-[5-(4-morpholinyl)-4-(phenylmethyl)-2-oxazolyl]-1-hexenyl ester**

The crude material was purified by column chromatography, by using petroleum ether/EtOAc 95:5 as eluant to give a light yellow oil (5%); IR (neat) 3282, 1660, 1600, 1558, 1355, 1052  $\text{cm}^{-1}$ ;  $^1\text{H}$ -NMR (300 MHz, 25°C,  $\text{CDCl}_3$ )  $\delta$  7.28-7.12 (m, 5-H), 6.19 (t,  $J = 7.7$  Hz, 1-H), 3.78 (s, 2-H), 3.65 (m, 4-H), 2.91 (m, 4-H), 2.53 (t,  $J = 7.4$  Hz, 2-H), 2.11 (q,  $J = 7.4$  Hz, 2-H), 1.73 (quint,  $J = 7.1$  Hz, 2-H), 1.39-1.30 (m, 8-H), 0.89 (m, 6-H);  $^{13}\text{C}$ -NMR (75 MHz, 25°C,  $\text{CDCl}_3$ )  $\delta$  169.4, 151.7 (2C), 139.1, 135.8, 128.6, 128.4, 126.1 (2C), 123.1, 67.1, 48.5, 34.0, 31.9, 31.3, 30.8, 25.4, 24.7, 22.2 (2C), 13.9 (2C).

**7, 1-[5-(benzylamino)-1,3-oxazol-2-yl]-2-phenyl-1-butanone**

The crude material was purified by column chromatography, by using petroleum ether/EtOAc 95:5 as eluant to give a yellow oil (40%).  $^1\text{H}$ -NMR (300 MHz, 25°C,  $\text{CDCl}_3$ )  $\delta$  7.41-7.15 (m, 5-H), 6.10 (s, 1-H), 6.00 (br t, 1-H), 4.68 (t,  $J = 7.7$  Hz, 1-H), 4.36 (d,  $J = 5.8$  Hz, 2-H), 2.13 (m, 1-H), 1.84 (m, 1-H), 0.88 (t,  $J = 7.4$  Hz, 2-H);  $^{13}\text{C}$ -NMR (75 MHz, 25°C,  $\text{CDCl}_3$ )  $\delta$  186.6, 159.4, 150.5, 139.8, 137.9, 129.4, 129.2, 128.6, 128.3, 128.1, 127.9, 104.1, 54.5, 48.5, 26.8, 12.8;  $m/z$  321 ( $\text{M}+\text{H}$ ) $^+$ .

***General procedure for the preparation of  $\alpha$ -ketoamides, 6***

To a solution of the 2-acyl-5-aminooxazole **7** in THF, HCl 37 % (100  $\mu\text{L}$ /0.1 mmol) was added dropwise. The reaction was stirred at room temperature for 1 hour. The solvent was evaporated and the reaction was diluted with ethyl acetate and washed with  $\text{Na}_2\text{CO}_3$  sat. aq. (x 1). The organic phase was dried over sodium sulphate and evaporated. The crude material was then purified by column chromatography by using petroleum ether/EtOAc as eluant to give the  $\alpha$ -ketoamide **6**.

**6a, N-[2-(4-morpholinyl)-2-oxo-1-(phenylmethyl)ethyl]-2-oxo-heptanamide**

The crude material was purified by column chromatography, by using petroleum ether/EtOAc 9:1 as eluant to give a yellow amorphous solid (61%). IR (neat) 3218, 1680, 1648, 1258, 898, 730  $\text{cm}^{-1}$ ;  $^1\text{H}$ -NMR (300 MHz, 25°C,  $\text{CDCl}_3$ , referred to the main rotamer)  $\delta$  7.71 (d,  $J = 8.3$  Hz, 1-H), 7.35-7.14 (m, 5-H), 5.03 (q,  $J = 8.3$  Hz, 1-H), 3.58 (d,  $J = 10.4$  Hz, 2-H), 3.50-3.31 (m, 4-H), 3.08-2.96 (m, 2-H), 2.95-2.78 (m, 4-H), 1.65-1.50 (br s, 2-H), 1.38-1.18 (br s, 4-H), 0.89 (br t, 3-H);  $^{13}\text{C}$ -NMR (75 MHz, 25°C,  $\text{CDCl}_3$ , referred to the main rotamer)  $\delta$  198.2, 169.0, 159.6, 135.8, 129.6, 128.8, 127.5, 66.0, 49.6, 46.0, 42.4, 39.9, 36.8, 31.2, 22.9, 13.9;  $m/z$  383 ( $\text{M}+\text{Na}$ ) $^+$ .

**6b, *N*-[2-(4-morpholinyl)-2-oxo-1-(phenylmethyl)ethyl]- $\alpha$ -oxo-benzenebutanamide**

The crude material was purified by column chromatography, by using petroleum ether/EtOAc 9:1 as eluant to give a light yellow oil (55%). IR (neat) 3228, 1682, 1655, 1265, 895, 732, 703  $\text{cm}^{-1}$ ;  $^1\text{H}$ -NMR (300 MHz, 25°C,  $\text{CDCl}_3$ )  $\delta$  7.66 (d,  $J = 8.5$  Hz, 1-H), 7.27-7.08 (m, 10-H), 4.96 (quart,  $J = 6.3$  Hz, 1-H), 3.55-3.46 (m, 2-H), 3.45-3.28 (m, 4-H), 3.19-3.12 (m, 2-H), 2.97-2.91 (m, 2-H), 2.89-2.74 (m, 4-H);  $^{13}\text{C}$ -NMR (75 MHz, 25°C,  $\text{CDCl}_3$ , referred to the main rotamer)  $\delta$  196.7, 168.6, 158.9, 140.0, 135.2, 129.2, 128.4, 128.1, 128.0, 127.1, 125.9, 66.0, 49.2, 45.6, 39.5, 38.1, 28.7;  $m/z$  395 ( $\text{M}+\text{H}$ ) $^+$ .

**6c, *N*-[2-(4-morpholinyl)-2-oxo-1-(phenylmethyl)ethyl]-2-oxo-butanamide**

The crude material was purified by column chromatography, by using petroleum ether/EtOAc 9:1 as eluant to give a white amorphous solid (68%). IR (neat) 3229, 1677, 1652, 1256, 890, 710  $\text{cm}^{-1}$ ;  $^1\text{H}$ -NMR (300 MHz, 25°C,  $\text{CDCl}_3$ , referred to the main rotamer)  $\delta$  7.71 (d,  $J = 8.2$  Hz, 1-H), 7.34-7.18 (m, 5-H), 5.03 (quart,  $J = 7.4$  Hz, 1-H), 3.57 (br d,  $J = 7.4$  Hz, 2-H), 3.49-3.35 (m, 4-H), 3.04-2.83 (m, 6-H), 1.24 (t,  $J = 7.2$  Hz, 3-H);  $^{13}\text{C}$ -NMR (75 MHz, 25°C,  $\text{CDCl}_3$ , referred to the main rotamer)  $\delta$  198.1, 168.6, 159.0, 135.2, 129.1, 128.4, 127.0, 66.0, 49.1, 45.6, 41.9, 30.0, 6.7;  $m/z$  319 ( $\text{M}+\text{H}$ ) $^+$ .

**6d,  $\alpha$ -(1,2-dioxoheptyl)amino]-*N*-methyl-*N*-(2-propynyl)-benzenepropanamide**

The crude material was purified by column chromatography, by using petroleum ether/EtOAc 9:1 as eluant to give a white solid (55%). IR (KBr) 1683, 1647, 1265, 1092, 895, 734  $\text{cm}^{-1}$ ;  $^1\text{H}$ -NMR (300 MHz, 25°C,  $\text{CDCl}_3$ , referred to the main rotamer)  $\delta$  7.70 (d,  $J$  = 8.5 Hz, 1-H), 7.25-7.11 (m, 5-H), 5.07-4.95 (m, 1-H), 4.10 (dd,  $J$  = 17.3/2.5 Hz, 1-H), 3.98 (dd,  $J$  = 17.3/2.5 Hz, 1-H), 2.98 (t,  $J$  = 7.4 Hz, 2-H), 2.81-2.72 (m, 2-H), 2.69 (s, 3-H), 2.19 (t,  $J$  = 2.5 Hz, 1-H), 1.53 (quint,  $J$  = 7.4 Hz, 2-H), 1.30-1.17 (m, 4-H), 0.83 (t,  $J$  = 7.2 Hz, 3-H);  $^{13}\text{C}$ -NMR (75 MHz, 25°C,  $\text{CDCl}_3$ , referred to the main rotamer)  $\delta$  197.8, 169.9, 159.2, 135.3, 129.1, 128.3, 126.9, 77.4, 72.1, 50.1, 39.1, 36.4, 36.3, 33.7, 30.9, 22.6, 22.0, 13.6;  $m/z$  365 ( $\text{M}+\text{Na}$ ) $^+$ ; Mp = 58 °C.

**6e, *N*-[1-methyl-2-[methyl(phenylmethyl)amino]-2-oxoethyl]- $\alpha$ -oxo-benzenebutanamide**

The crude material was purified by column chromatography, by using petroleum ether/EtOAc 9:1 as eluant to give a yellow oil (65%). IR (neat) 1681, 1643, 1496, 1453, 1107, 733, 698  $\text{cm}^{-1}$ ;  $^1\text{H}$ -NMR (300 MHz, 25°C,  $\text{CDCl}_3$ , referred to the main rotamer)  $\delta$  7.95 (d,  $J$  = 7.7 Hz, 1-H), 7.30-7.04 (m, 10-H), 4.96-4.82 (m, 1-H), 4.68 (d,  $J$  = 14.6 Hz, 1-H), 4.52 (d,  $J$  = 14.6 Hz, 1-H), 3.29-3.17 (m, 2-H), 2.98-2.90 (m, 5-H), 1.41 (d,  $J$  = 6.6 Hz, 3-H);  $^{13}\text{C}$ -NMR (75 MHz, 25°C,  $\text{CDCl}_3$ , referred to the main rotamer)  $\delta$  196.8, 171.1, 158.8, 140.0, 136.0, 128.3, 128.2, 128.1, 128.0, 127.5, 125.8, 50.8, 45.0, 38.0, 34.0, 28.7, 17.9;  $m/z$  375 ( $\text{M}+\text{Na}$ ) $^+$ .

**6f, *N*-[2-[methyl(phenylmethyl)amino]-2-oxoethyl]-2-oxo-butanamide**

The crude material was purified by column chromatography, by using petroleum ether/EtOAc 9:1 as eluant to give an orange oil (65%). IR (neat) 1684, 1648, 1496, 1453, 1114, 734, 700  $\text{cm}^{-1}$ ;  $^1\text{H}$ -NMR (300 MHz, 25°C,  $\text{CDCl}_3$ , referred to the main rotamer)  $\delta$  7.90 (br s, 1-H), 7.38-7.10 (m, 5-H), 4.59 (s, 1-H), 4.10 (br d, 2-H), 2.98-2.84 (m, 5-H), 1.09 (br t, 3-H);  $^{13}\text{C}$ -NMR (75 MHz, 25°C,

CDCl<sub>3</sub>, referred to the main rotamer)  $\delta$  190.1, 168.0, 160.9, 136.9, 129.4, 128.6, 126.9, 52.0, 41.7, 34.2, 31.0, 7.7;  $m/z$  263 (M+H)<sup>+</sup>.

**6g,  $\alpha$ -oxo-*N*-[2-oxo-2-[(phenylmethyl)amino]ethyl]-cyclopentanebutanamide**

The crude material was purified by column chromatography, by using petroleum ether/EtOAc 9:1 as eluant to give a yellow solid (67%). IR (KBr) 3246, 2945, 2866, 1723, 1681, 1568, 701 cm<sup>-1</sup>; <sup>1</sup>H-NMR (300 MHz, 25°C, CDCl<sub>3</sub>)  $\delta$  7.73 (br t, 1-H), 7.33-7.16 (m, 5-H), 6.73 (br t, 1-H), 4.40 (d,  $J$  = 5.8 Hz, 2-H), 3.96 (d,  $J$  = 5.8 Hz, 2-H), 2.82 (t,  $J$  = 7.4 Hz, 2-H), 1.79-1.64 (m, 2-H), 1.63-1.43 (m, 7-H), 1.15-0.97 (m, 2-H); <sup>13</sup>C-NMR (75 MHz, 25°C, CDCl<sub>3</sub>)  $\delta$  197.7, 167.3, 160.3, 137.2, 128.3, 127.3, 127.2, 43.2, 42.4, 39.1, 35.7, 32.0, 28.8, 24.7;  $m/z$  315 (M-H)<sup>-</sup>; Mp = 114-115 °C.

**6h, 2-oxo-*N*-[2-oxo-2-[(phenylmethyl)amino]ethyl]-heptanamide**

The crude material was purified by column chromatography, by using petroleum ether/EtOAc 9:1 as eluant to give a brown solid (67%). IR (KBr) 3323, 2926, 2859, 1725, 1651, 1232, 741 <sup>1</sup>H-NMR (300 MHz, 25°C, CDCl<sub>3</sub>)  $\delta$  7.76 (br t, 1-H), 7.32-7.17 (m, 5-H), 6.78 (br t, 1-H), 4.40 (d,  $J$  = 5.8 Hz, 2-H), 3.96 (d,  $J$  = 5.8 Hz, 2-H), 2.78 (t,  $J$  = 7.4 Hz, 2-H), 1.55 (quint,  $J$  = 6.9 Hz, 2-H), 1.36-1.18 (m, 4-H), 0.87 (t,  $J$  = 6.3 Hz, 3-H); <sup>13</sup>C-NMR (75 MHz, 25°C, CDCl<sub>3</sub>)  $\delta$  197.6, 167.3, 160.2, 137.2, 128.3, 127.3, 127.2, 43.2, 42.3, 36.3, 30.7, 22.3, 21.9, 13.4;  $m/z$  289 (M-H)<sup>-</sup>; Mp = 113-114 °C.

**6i, 2-oxo-*N*-[2-oxo-2-(2-propynylamino)ethyl]-heptanamide**

The crude material was purified by column chromatography, by using petroleum ether/EtOAc 9:1 as eluant to give a white solid (51%). IR (KBr) 1725, 1655, 1236, 1089, 892, 631 cm<sup>-1</sup>; <sup>1</sup>H-NMR (300 MHz, 25°C, CDCl<sub>3</sub>)  $\delta$  7.76 (s, 1-H), 6.77 (s, 1-H), 4.00 (quart,  $J$  = 5.22/2.5 Hz, 2-H), 3.96 (d,  $J$  = 5.77 Hz, 2-H), 2.88 (t,  $J$  = 7.4 Hz, 2-H), 2.18 (t,  $J$  = 2.5 Hz, 1-H), 1.55 (quint,  $J$  = 7.1 Hz, 2-H),

1.33-1.17 (m, 4-H), 0.82 (t,  $J = 6.9$  Hz, 3-H);  $^{13}\text{C}$ -NMR (75 MHz,  $25^\circ\text{C}$ ,  $\text{CDCl}_3$ )  $\delta$  198.7, 168.4, 161.4, 79.7, 72.5, 43.4, 37.5, 31.8, 29.9, 23.4, 23.0, 14.5;  $m/z$  239 ( $\text{M}+\text{H}$ ) $^+$ ; Mp = 135-136  $^\circ\text{C}$ .

**6j, 2-oxo-*N*-[2-oxo-2-(2-propynylamino)ethyl]-butanamide**

The crude material was purified by column chromatography, by using petroleum ether/EtOAc 9:1 as eluant to give an amorphous yellow solid (50%). IR (neat) 1725, 1655, 1523, 1264, 738, 699  $\text{cm}^{-1}$ ;  $^1\text{H}$ -NMR (300 MHz,  $25^\circ\text{C}$ ,  $(\text{CD}_3)_2\text{CO}$ )  $\delta$  7.98 (s, 1-H), 7.63 (s, 1-H), 3.90 (dd,  $J = 5.5/2.5$  Hz, 2-H), 3.84 (d,  $J = 6.0$  Hz, 2-H), 2.79 (quart,  $J = 7.4$  Hz, 2-H), 2.55 (t,  $J = 2.5$  Hz, 1-H), 0.94 (t,  $J = 7.1$  Hz, 3-H);  $^{13}\text{C}$ -NMR (75 MHz,  $25^\circ\text{C}$ ,  $(\text{CD}_3)_2\text{CO}$ )  $\delta$  199.1, 168.2, 161.2, 80.7, 71.8, 42.4, 33.0, 24.0, 7.0;  $m/z$  197 ( $\text{M}+\text{H}$ ) $^+$ .

**6k, *N*-[2-(butylamino)-2-oxoethyl]- $\alpha$ -oxo-cyclopentanebutanamide**

The crude material was purified by column chromatography, by using petroleum ether/EtOAc 7:3 as eluant to give a yellow solid (70%). IR (KBr) 2360, 1733, 1628, 1453, 1178, 749, 698  $\text{cm}^{-1}$ ;  $^1\text{H}$ -NMR (300 MHz,  $25^\circ\text{C}$ ,  $\text{CDCl}_3$ )  $\delta$  7.79 (br t, 1-H), 6.44 (br t, 1-H), 3.94 (d,  $J = 5.8$  Hz, 2-H), 3.22 (quart,  $J = 6.7$  Hz, 2-H), 2.87 (t,  $J = 7.4$  Hz, 2-H), 1.79-1.64 (m, 2-H), 1.63-1.16 (m, 11-H), 1.14-0.96 (m, 2-H), 0.87 (t,  $J = 7.2$  Hz, 3-H);  $^{13}\text{C}$ -NMR (75 MHz,  $25^\circ\text{C}$ ,  $\text{CDCl}_3$ )  $\delta$  197.8, 167.2, 160.3, 42.4, 39.1, 39.0, 35.7, 32.0, 31.0, 28.9, 24.7, 19.6, 13.2;  $m/z$  281 ( $\text{M}-\text{H}$ ) $^-$ ; Mp = 81-82  $^\circ\text{C}$ .

**6l, *N*-[2-(butylamino)-2-oxoethyl]-2-oxo-heptanamide**

The crude material was purified by column chromatography, by using petroleum ether/EtOAc 95:5 as eluant to give a white solid (51%). IR (KBr) 1670, 1265, 1089, 895, 734, 704  $\text{cm}^{-1}$ ;  $^1\text{H}$ -NMR (300 MHz,  $25^\circ\text{C}$ ,  $\text{CDCl}_3$ )  $\delta$  7.74 (br t, 1-H), 6.29 (br t, 1-H), 3.94 (d,  $J = 5.5$  Hz, 2-H), 3.23 (quart,  $J = 6.5$  Hz, 2-H), 2.86 (t,  $J = 7.1$  Hz, 2-H), 1.57 (quint,  $J = 7.1$  Hz, 2-H), 1.45 (quint,  $J = 7.2$  Hz, 2-



H), 1.39-1.15 (m, 12-H);  $^{13}\text{C}$ -NMR (75 MHz, 25°C,  $\text{CDCl}_3$ )  $\delta$  197.7, 167.2, 160.3, 42.5, 39.1, 36.4, 31.1, 29.3, 22.4, 22.0, 19.6, 13.7, 13.3;  $m/z$  255 (M-H) $^-$ ; Mp = 99-100 °C.

**6m,  $\beta$ -ethyl- $\alpha$ -oxo-*N*-[2-oxo-2-[(phenylmethyl)amino]ethyl]- benzenepropanamide**

The crude material was purified by column chromatography, by using petroleum ether/EtOAc 9:1 as eluant to give a yellow oil (71%). IR (KBr) 3307, 2927, 1716, 1664, 1522, 1260, 698  $\text{cm}^{-1}$ ;  $^1\text{H}$ -NMR (300 MHz, 25°C,  $\text{CDCl}_3$ )  $\delta$  7.57 (br s, 1-H), 7.35-7.14 (m, 10-H), 6.18 (br s, 1-H), 4.58 (t,  $J$  = 7.4 Hz, 1-H), 4.38 (d,  $J$  = 5.8 Hz, 2-H), 3.85 (dd,  $J$  = 16.2 Hz, 5.2 Hz, 1-H), 3.77 (dd,  $J$  = 16.2 Hz, 5.8 Hz, 1-H), 2.11-1.97 (m, 1-H), 1.86-1.70 (m, 1-H), 0.84 (t,  $J$  = 7.1 Hz, 3-H);  $^{13}\text{C}$ -NMR (75 MHz, 25°C,  $\text{CDCl}_3$ )  $\delta$  197.1, 168.2, 161.1, 138.2, 137.4, 129.7, 129.6, 129.5, 128.7, 128.5, 128.2, 53.3, 44.4, 43.7, 25.8, 12.7;  $m/z$  339 (M+H) $^+$ .

**References**

- 1) Cardellina, J. H., II; Barnekow, D. E. *J. Org. Chem.* **1988**, *53*, 882-4.
- 2) Dömling, A.; Beck, B.; Fuchs, T.; Yazback, A. *J. Comb. Chem.* **2006**, *8*, 872-880.
- 3) Housseman, C.; Zhu, J. *Synlett* **2006**, *11*, 1777-1779.
- 4) Pirali, T.; Tron, G. C.; Zhu, J. *Org. Lett.* **2006**, *8*, 4145-4148.

2d

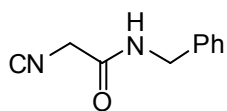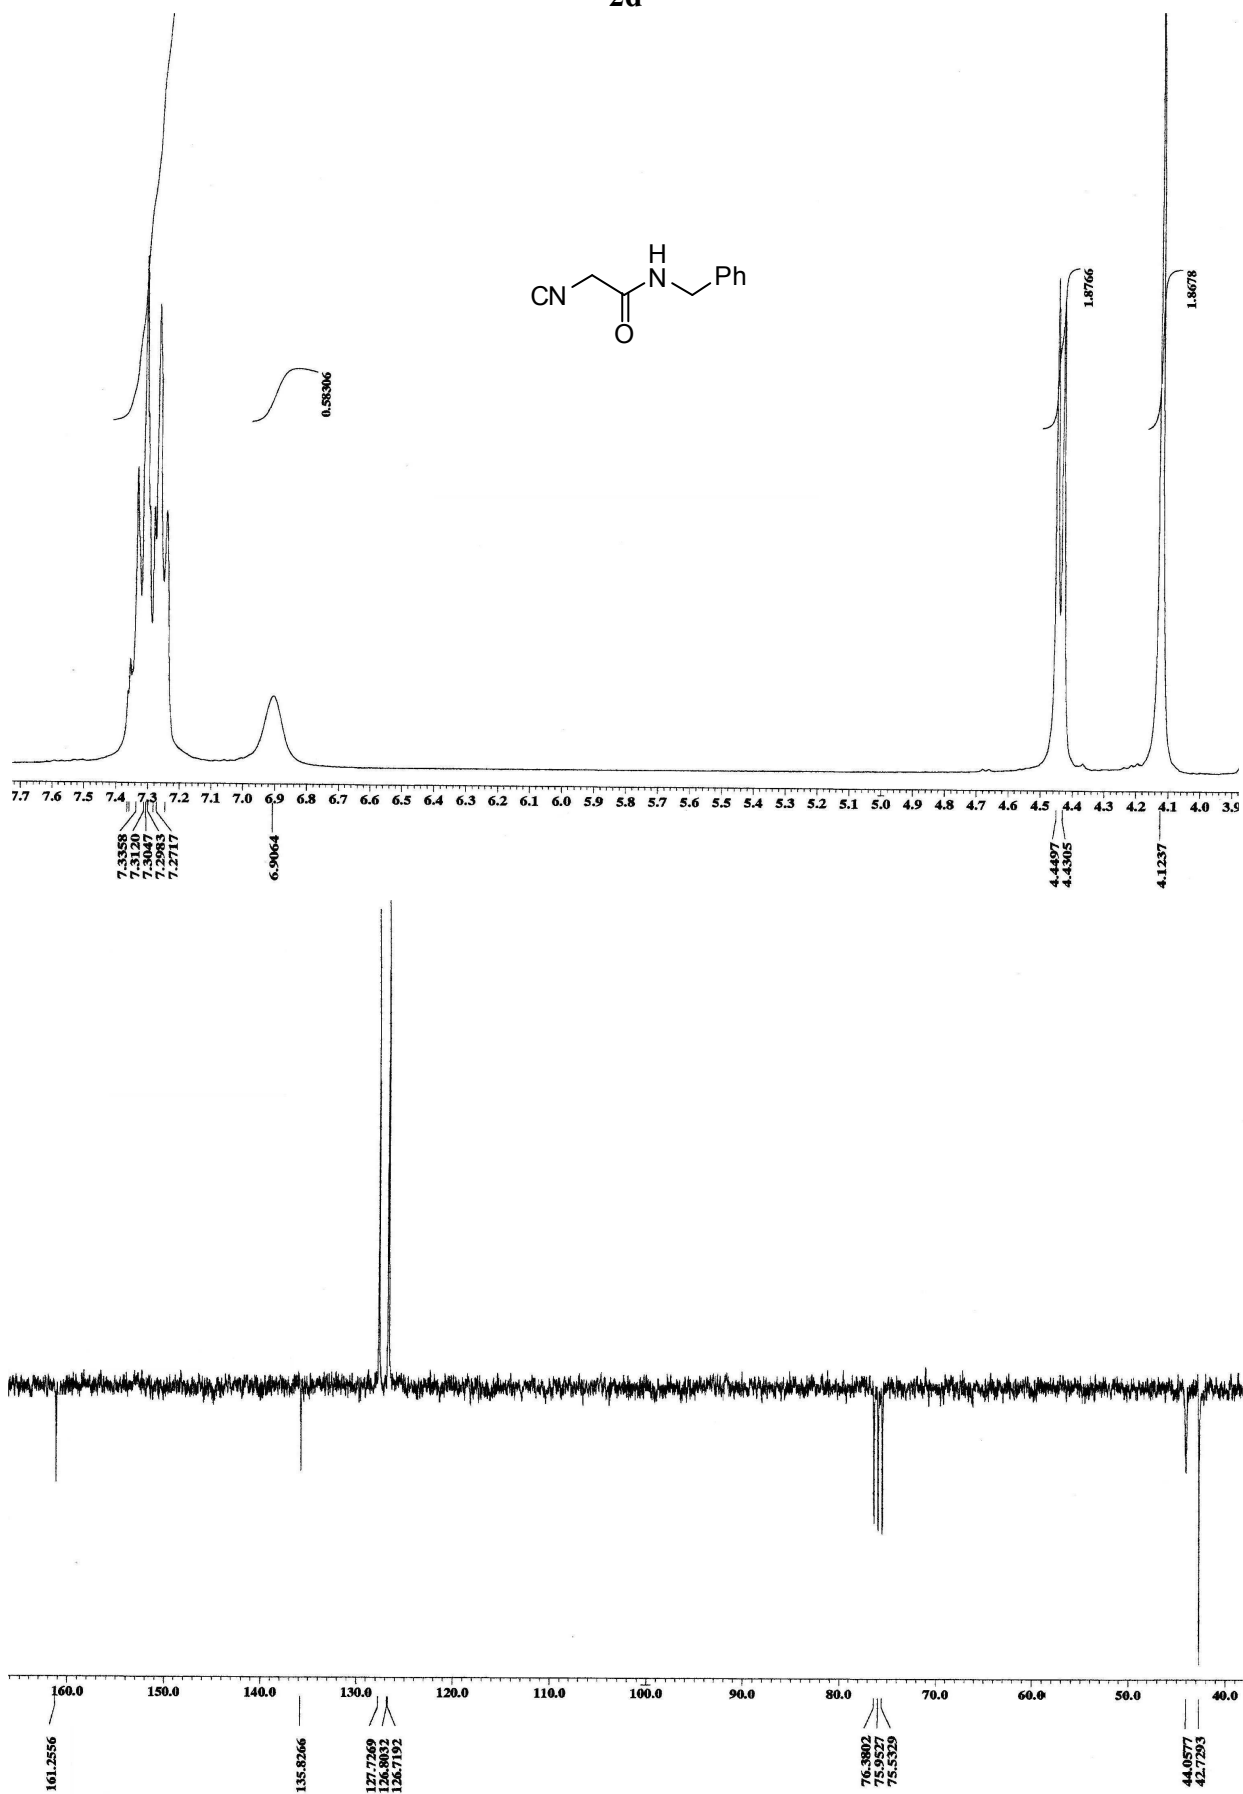

2e

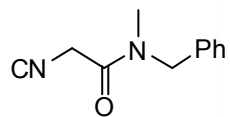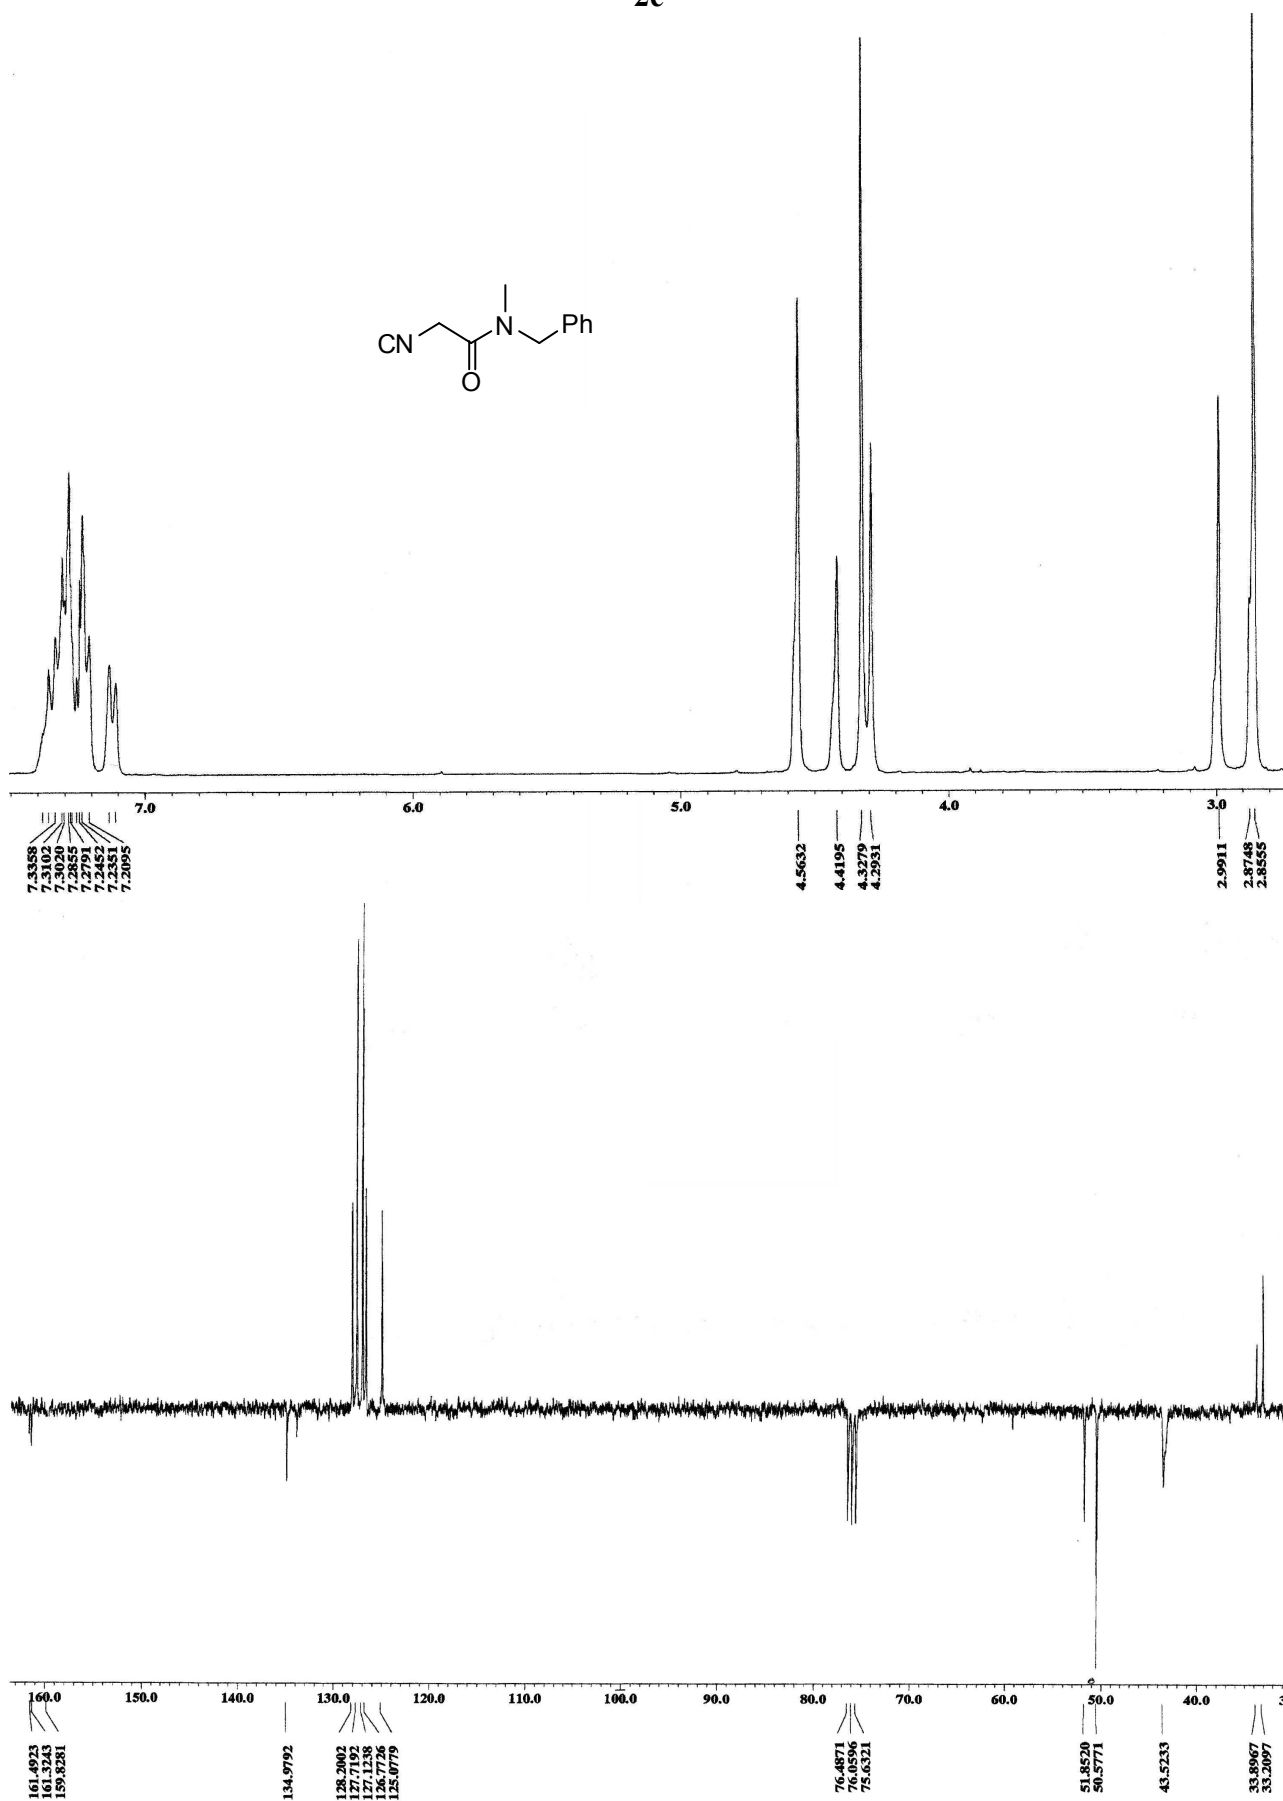

2f

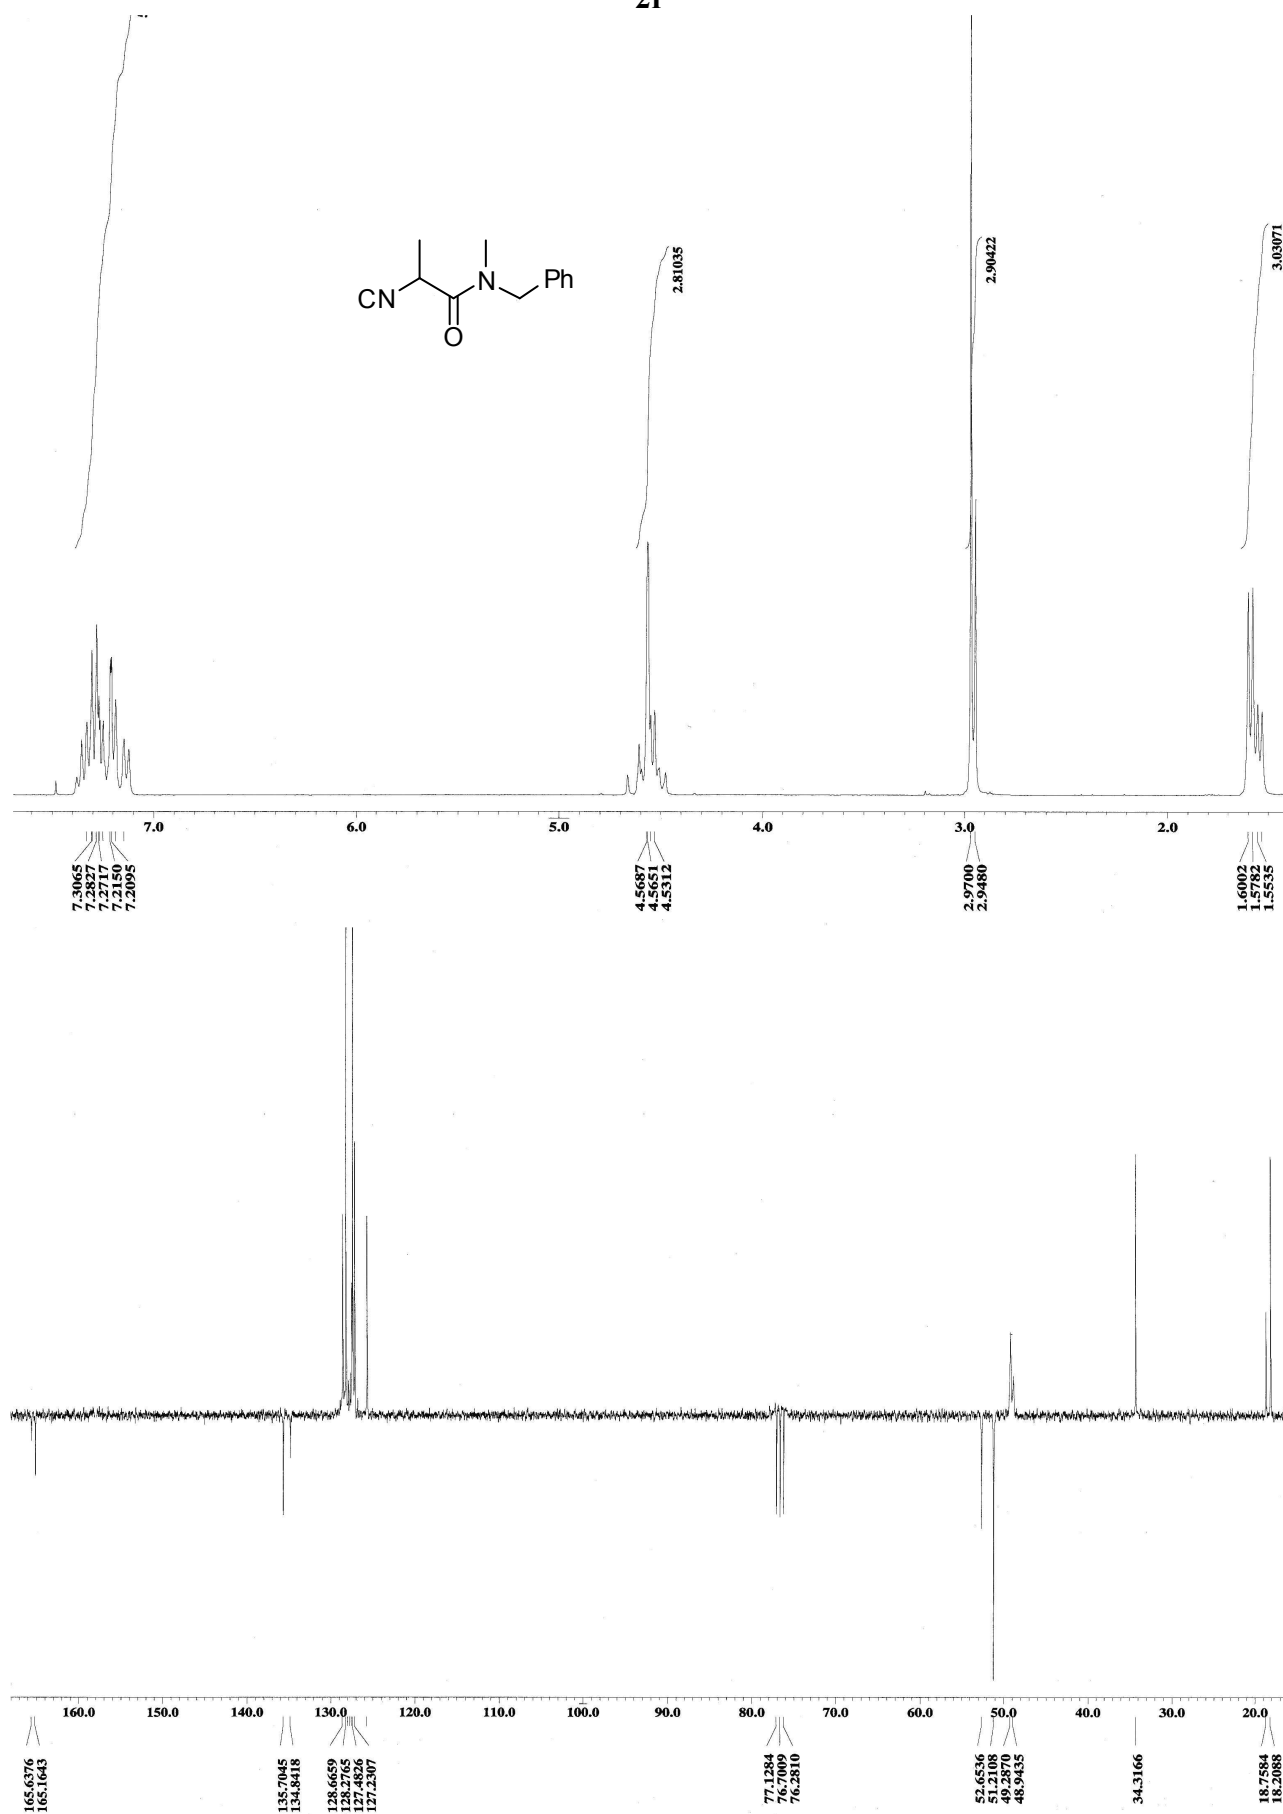

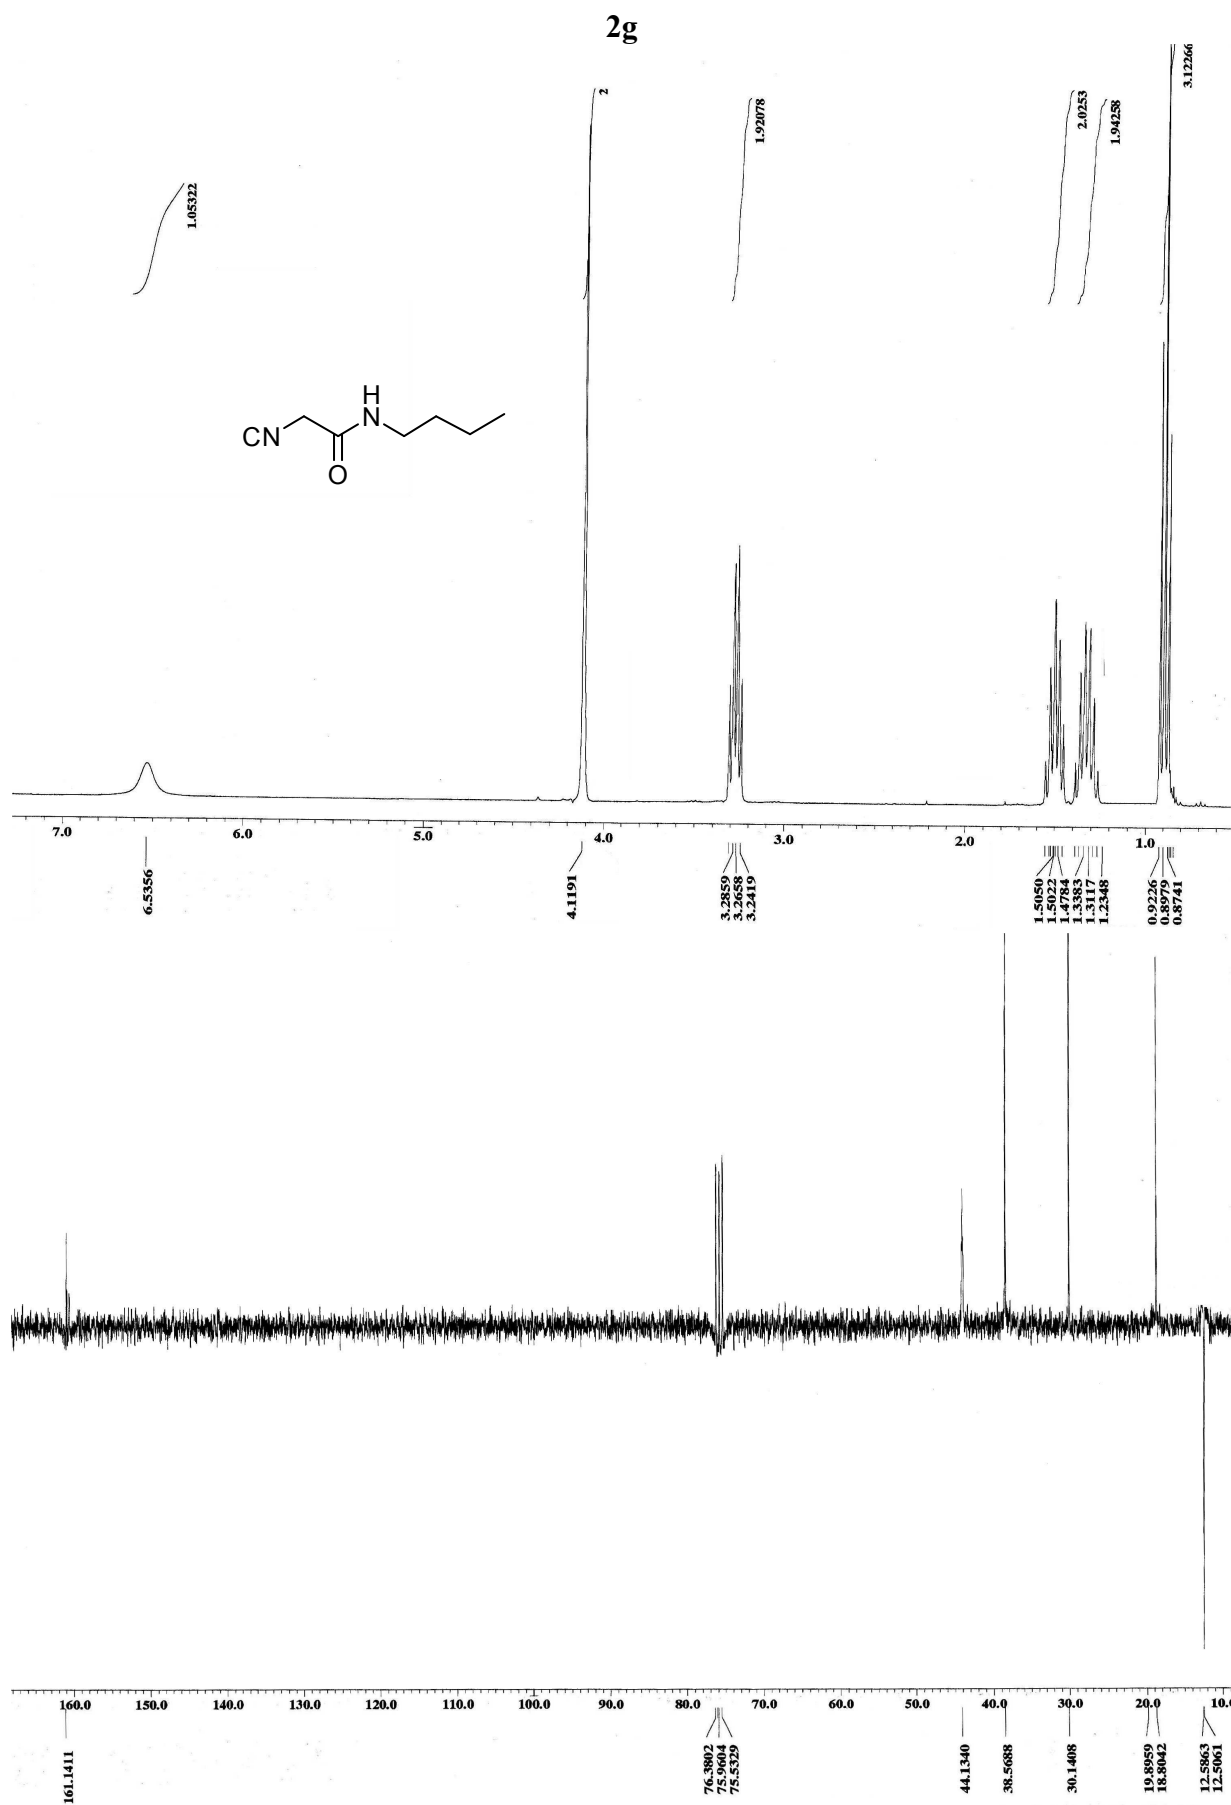

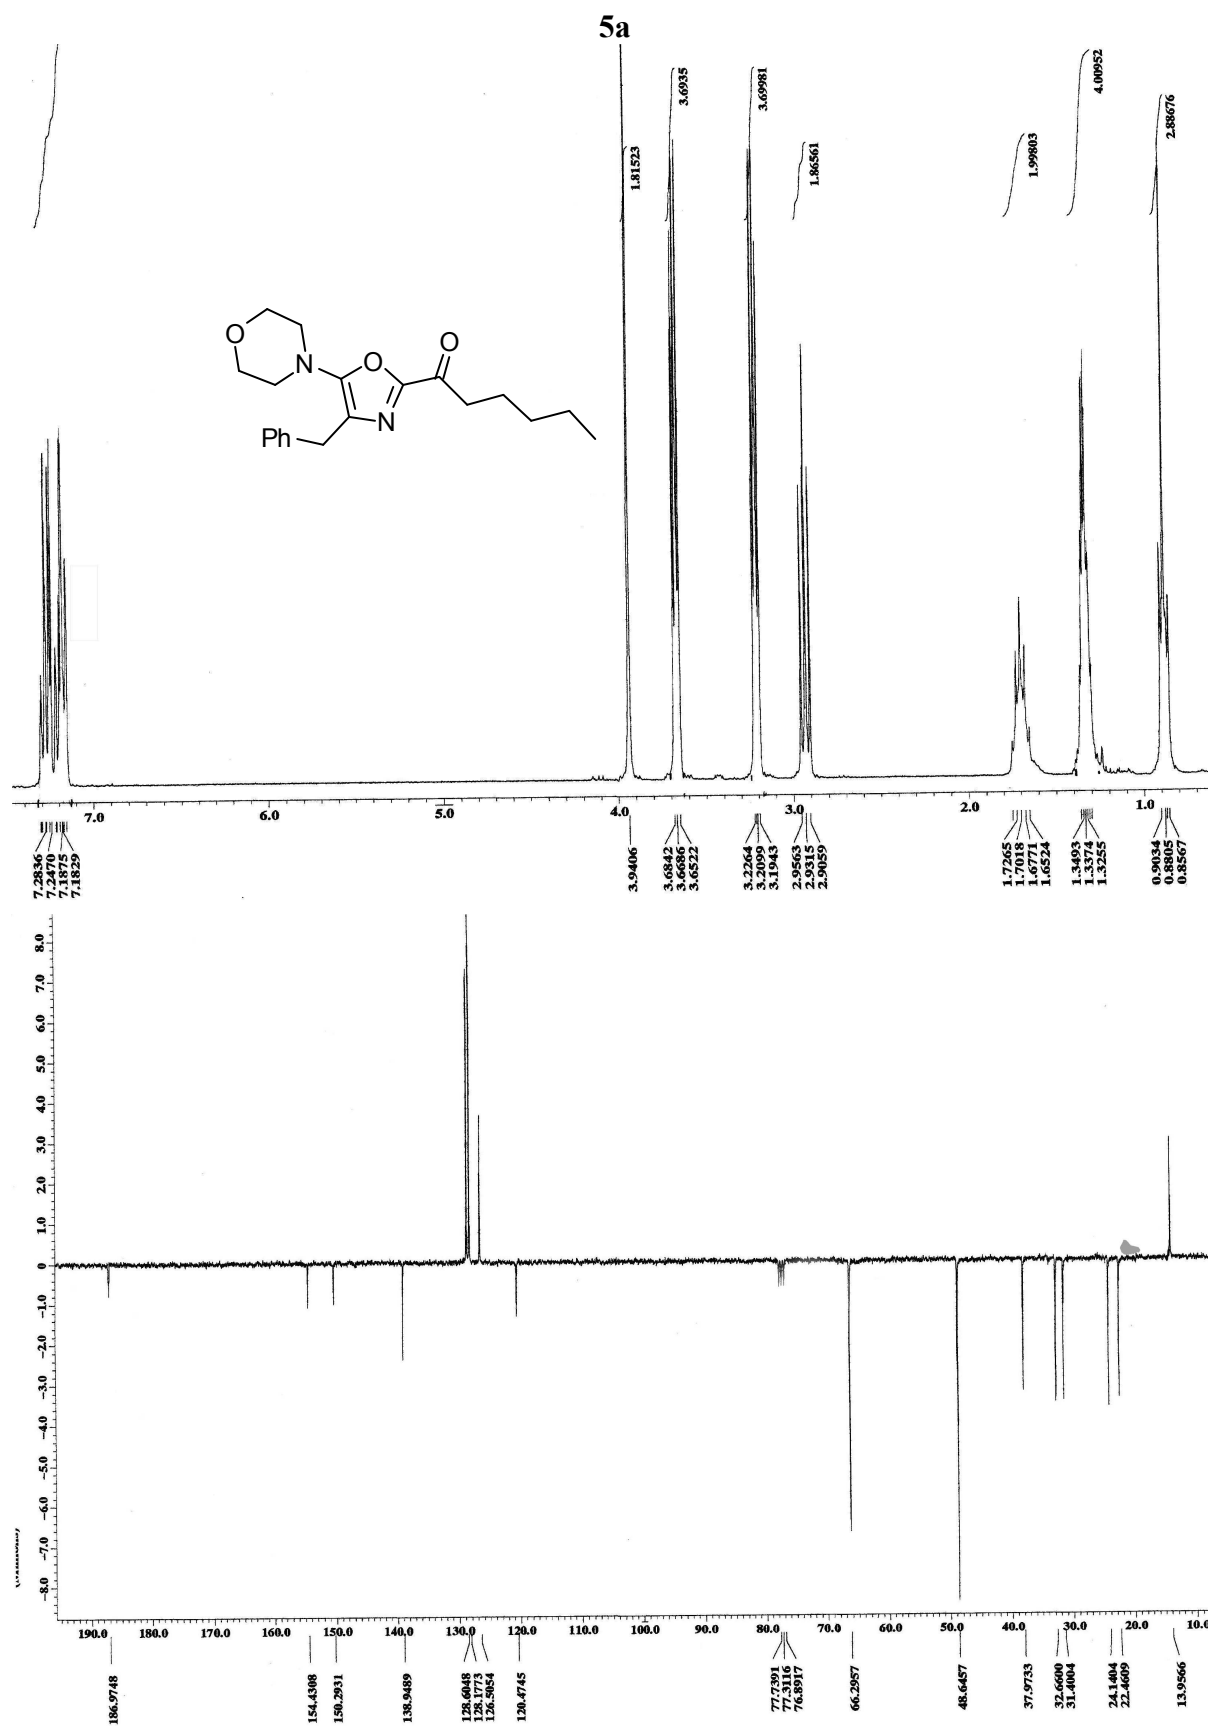

5b

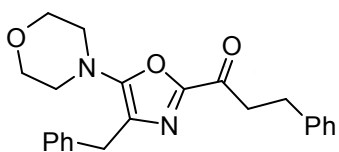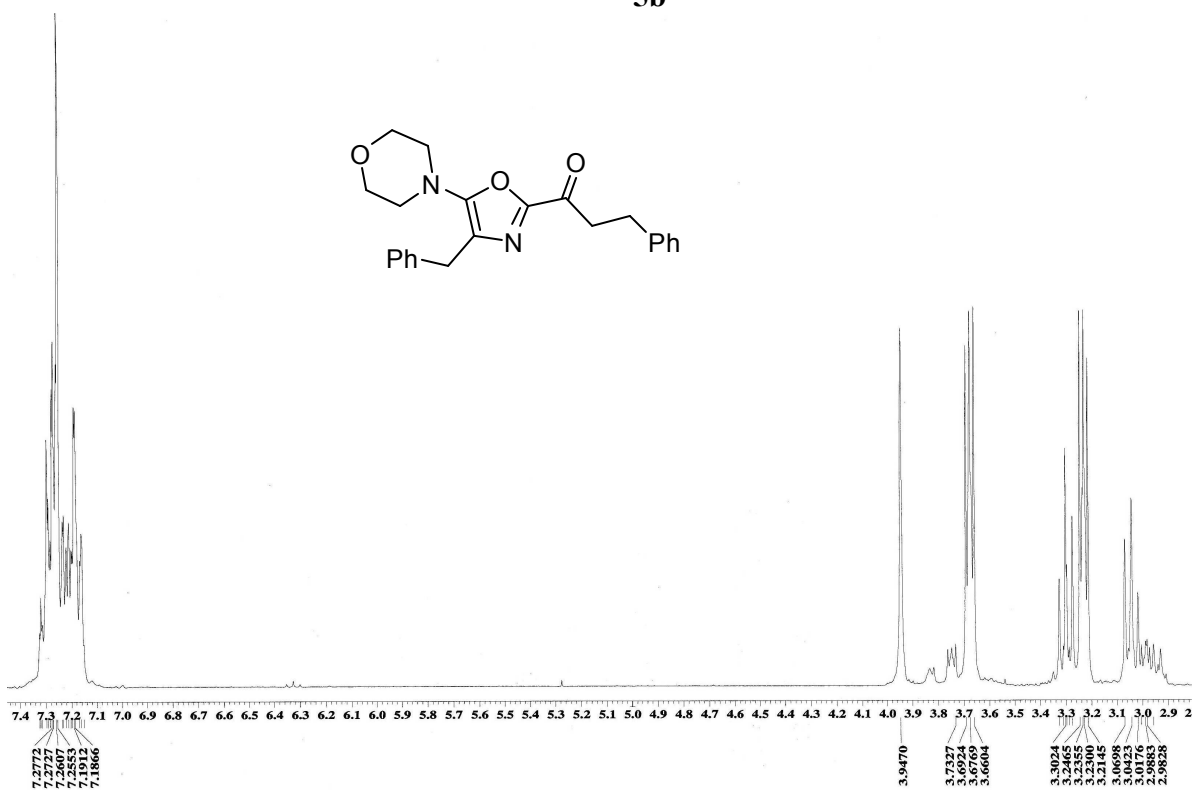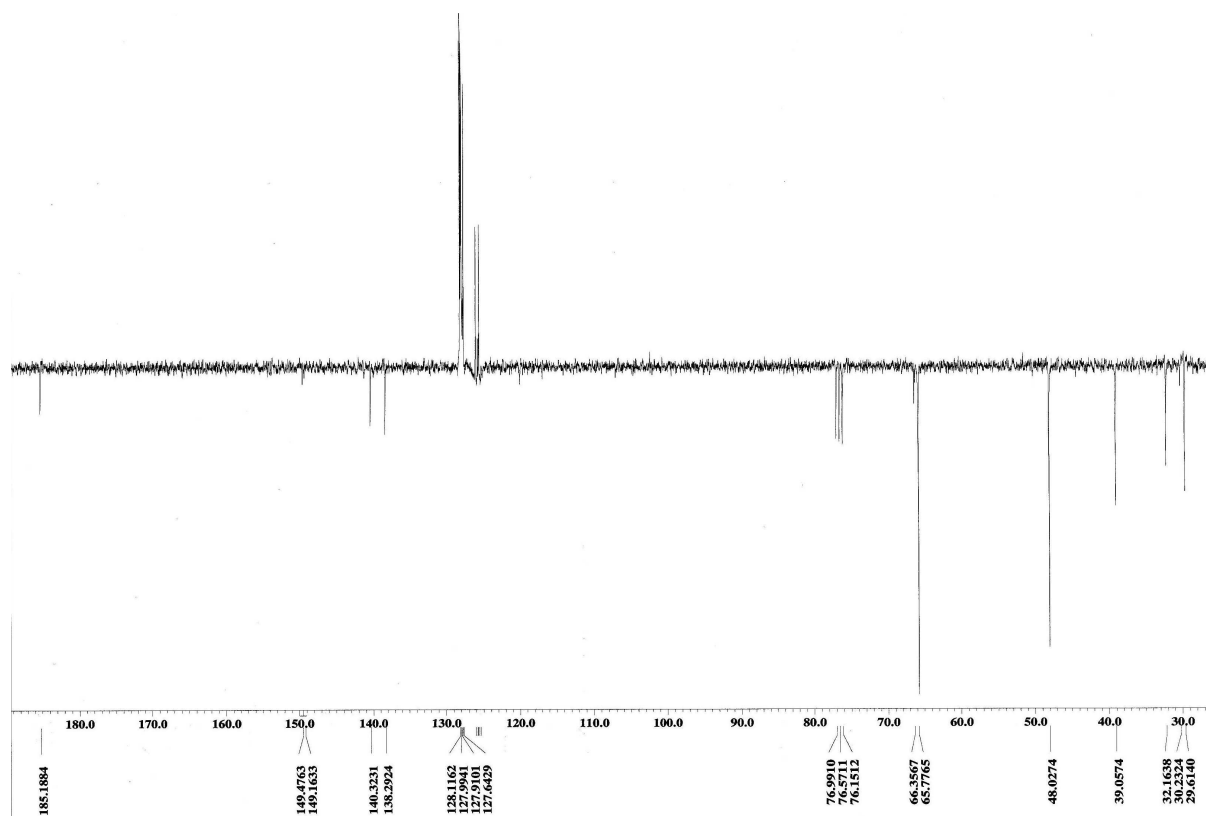

5c

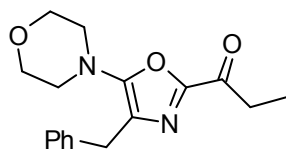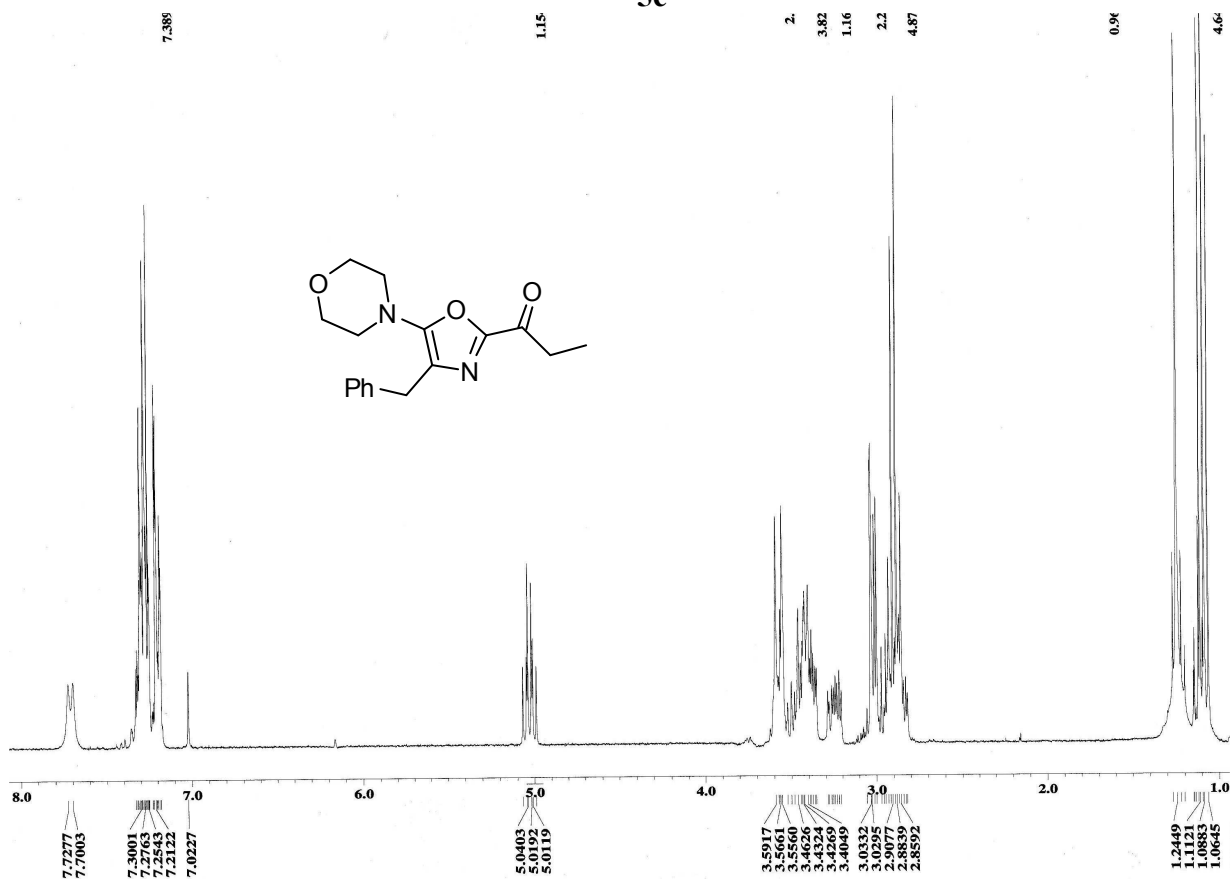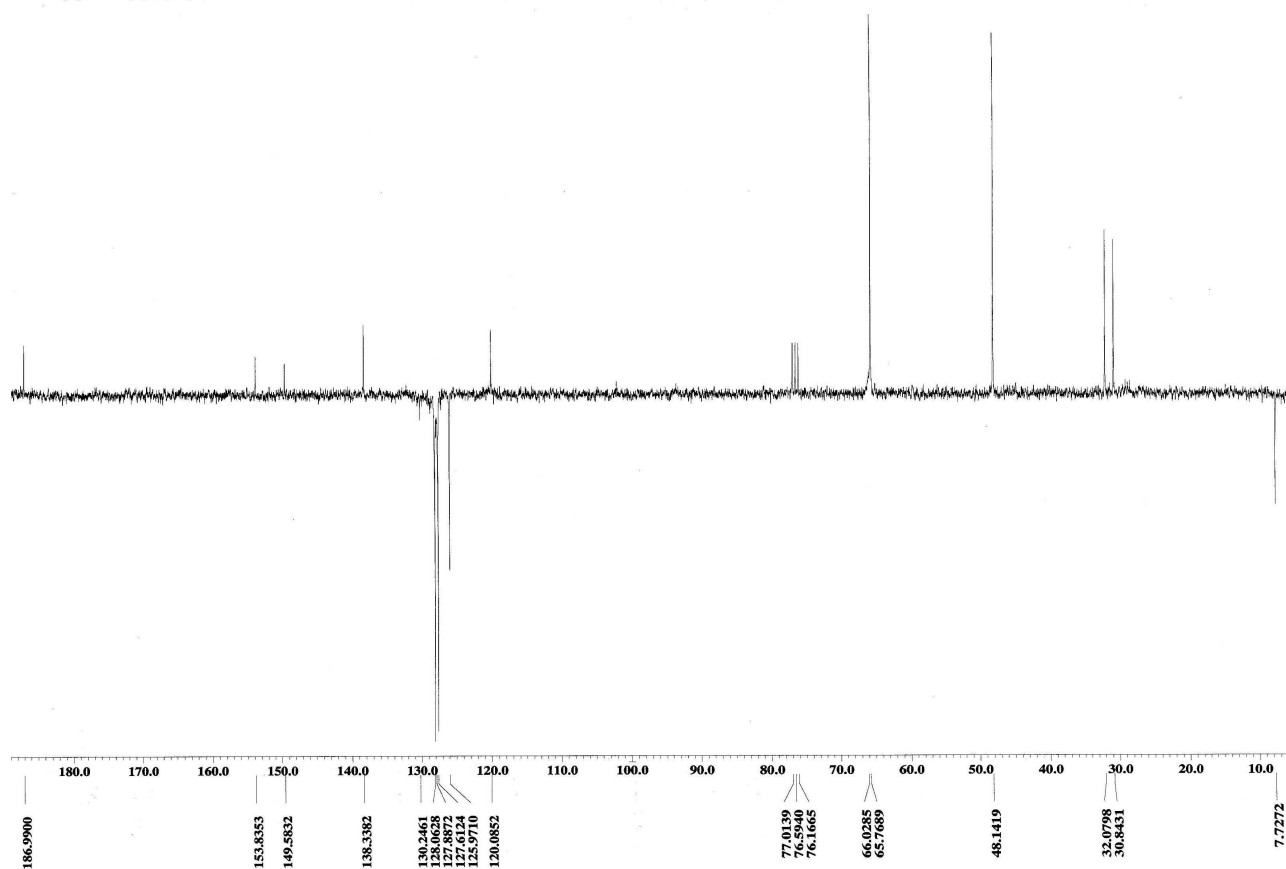



5d

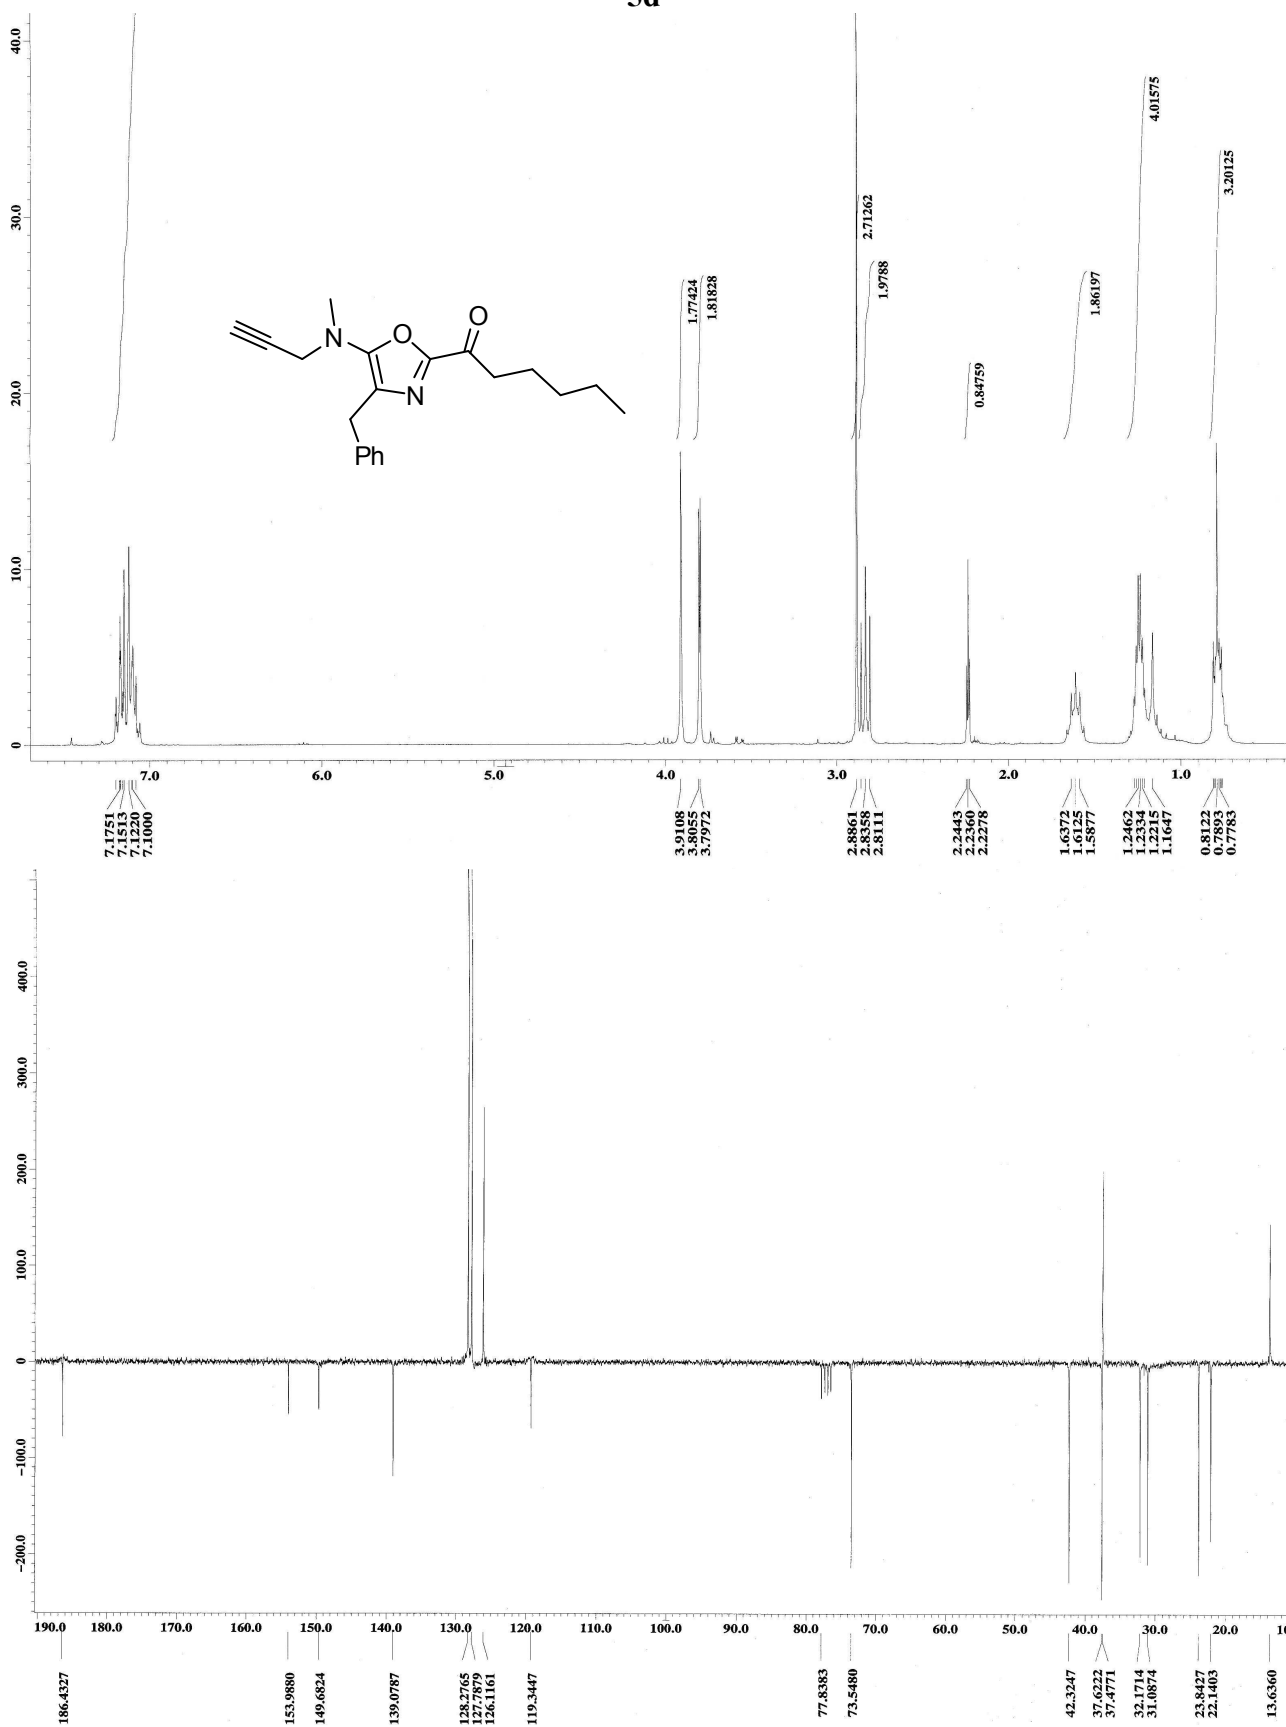

5e

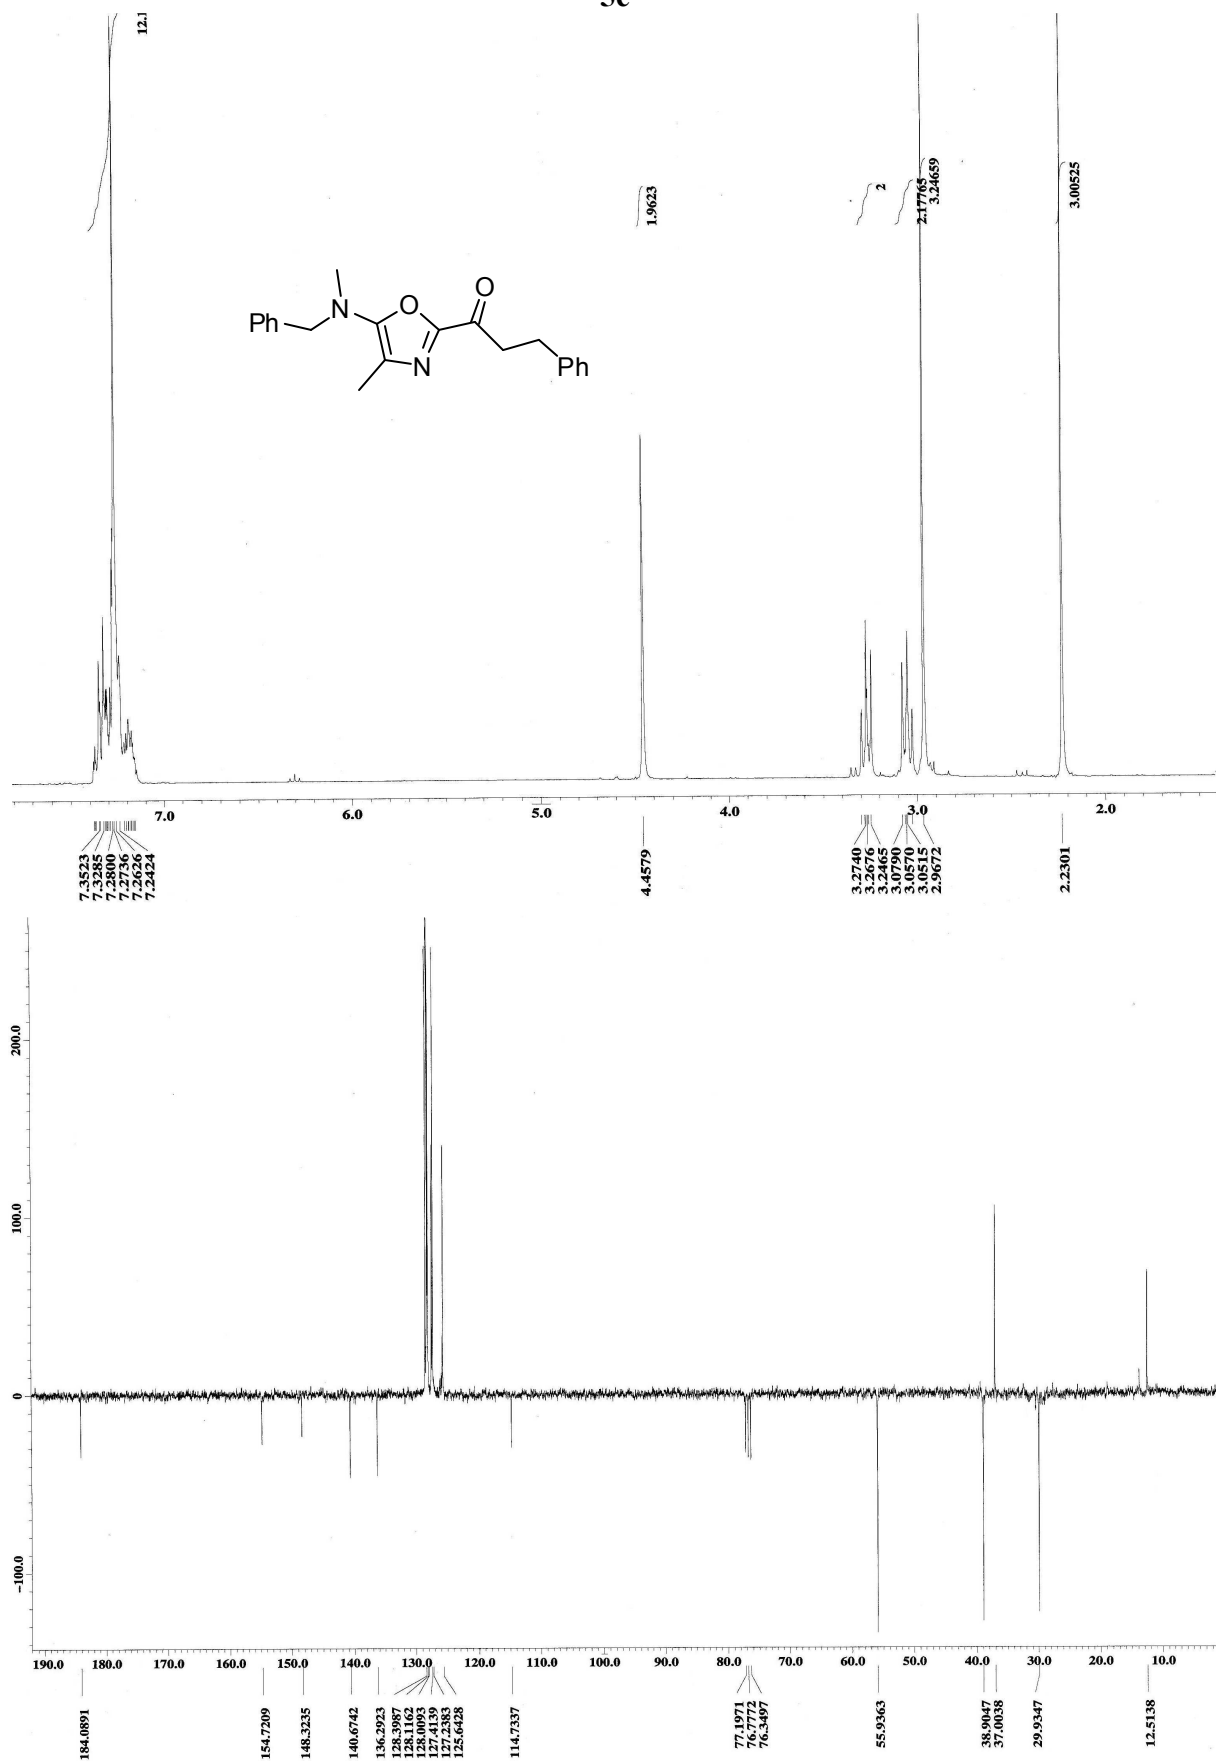

5f

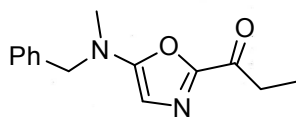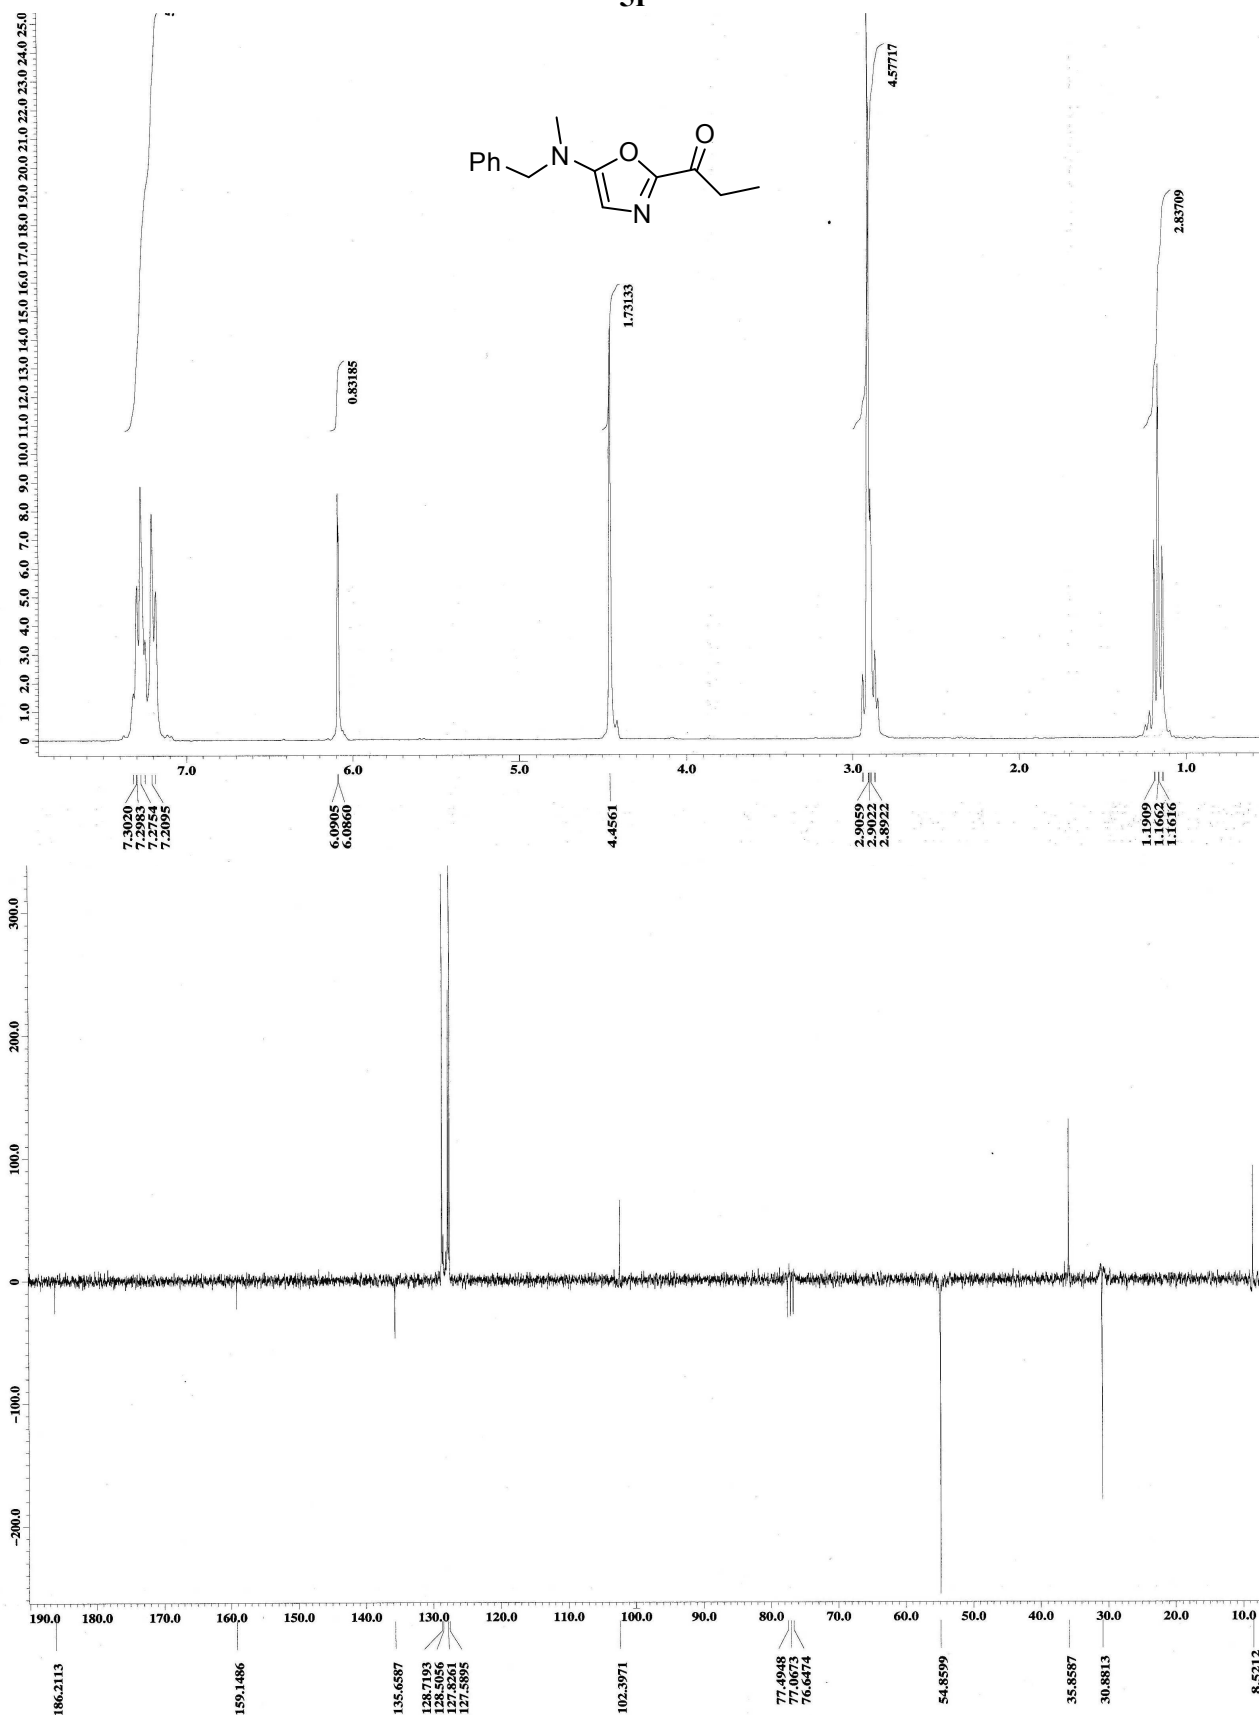

5g

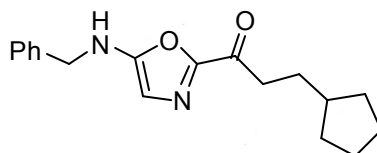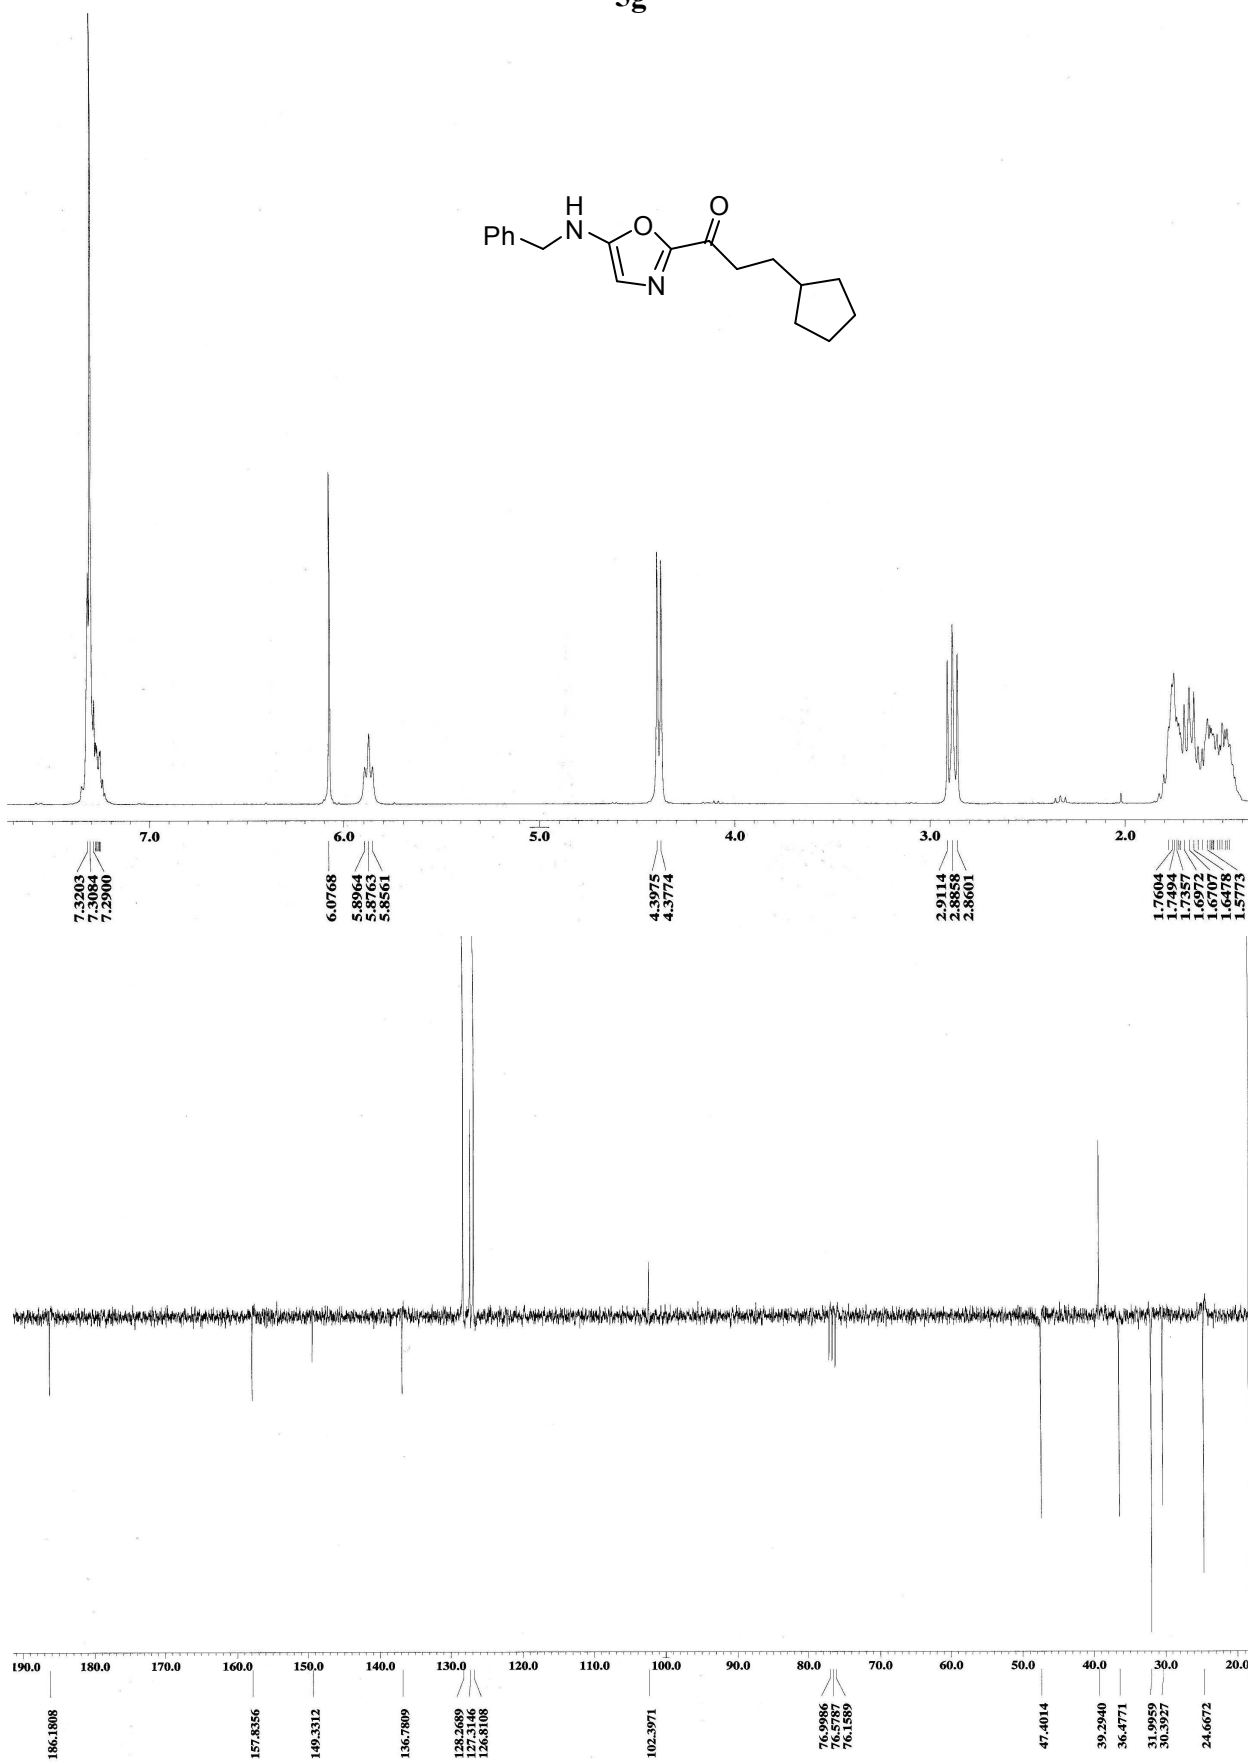

5h

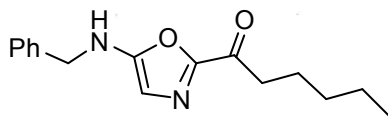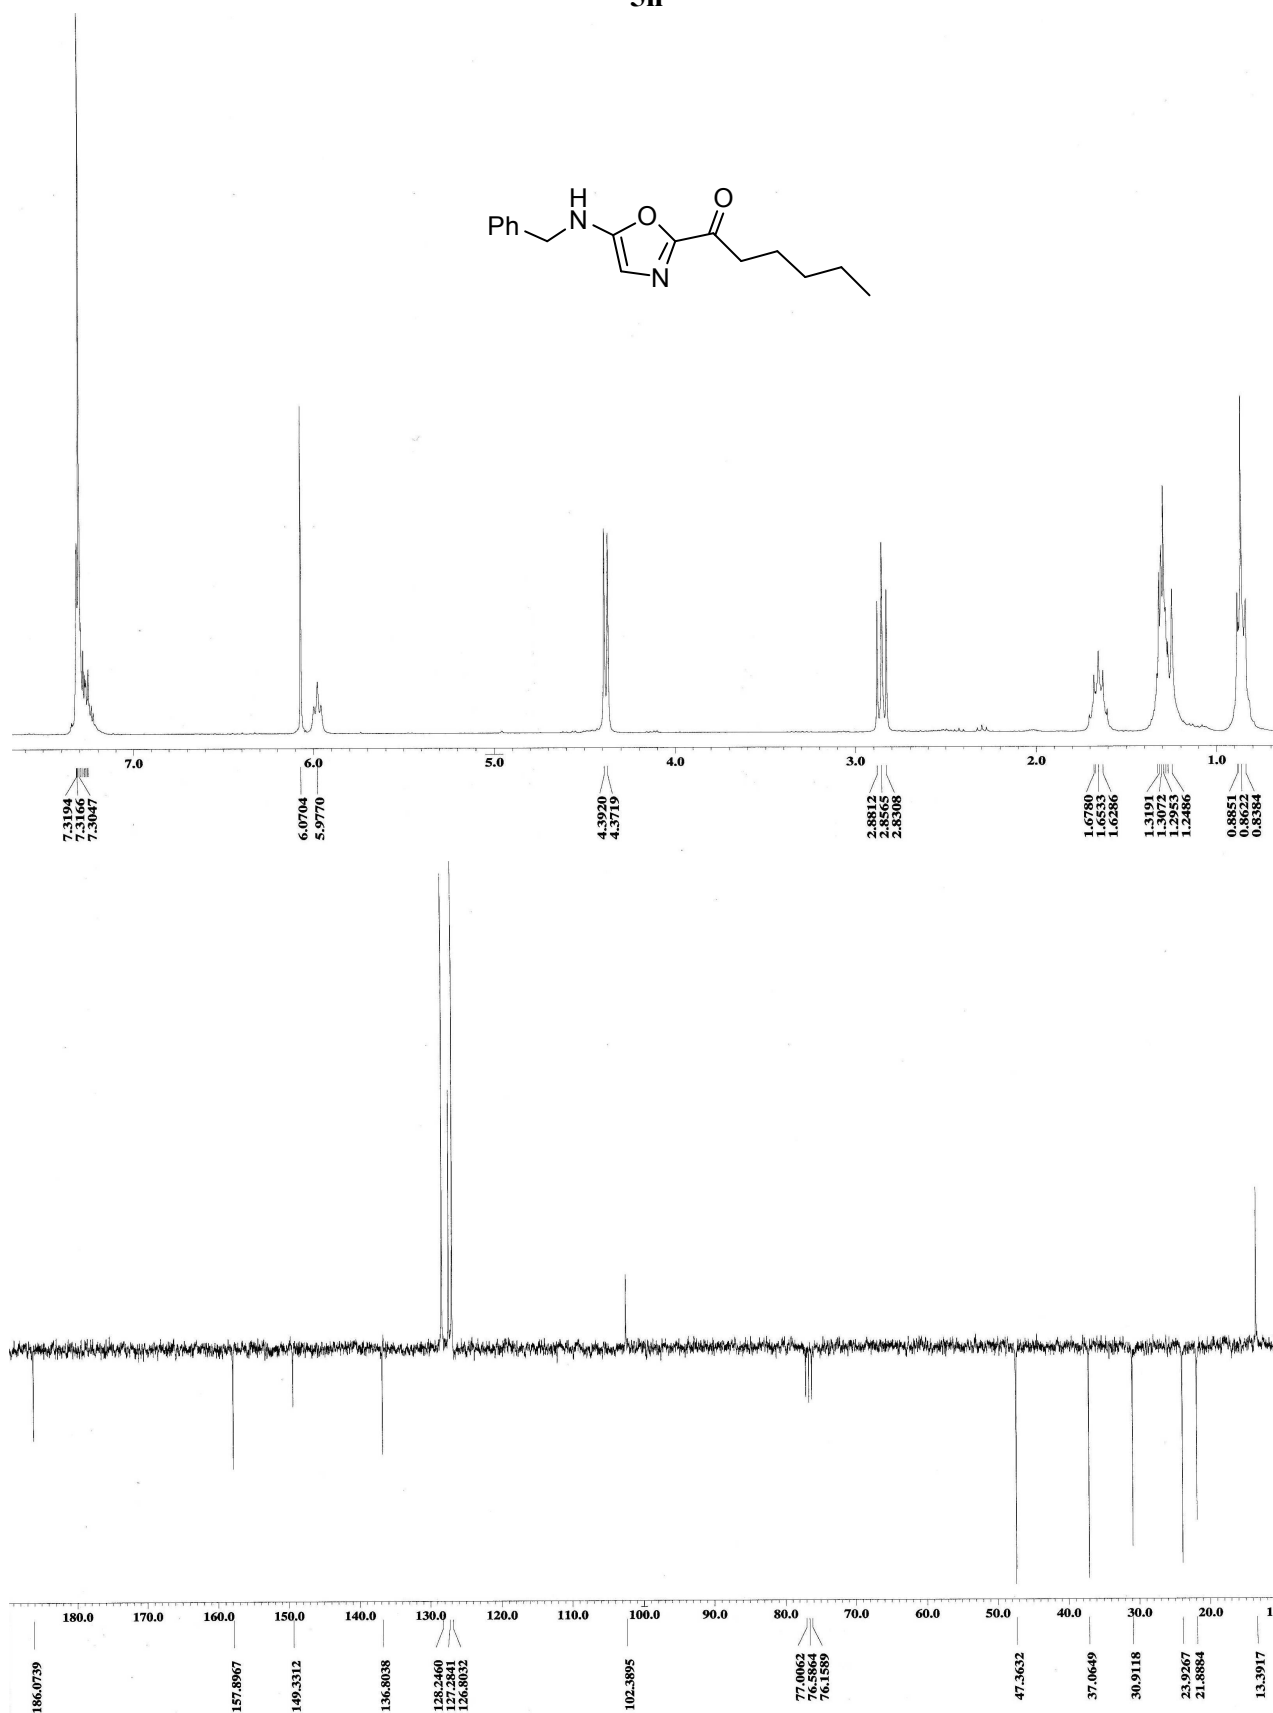

5i

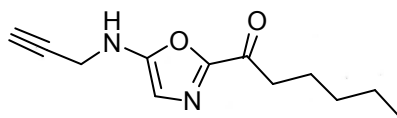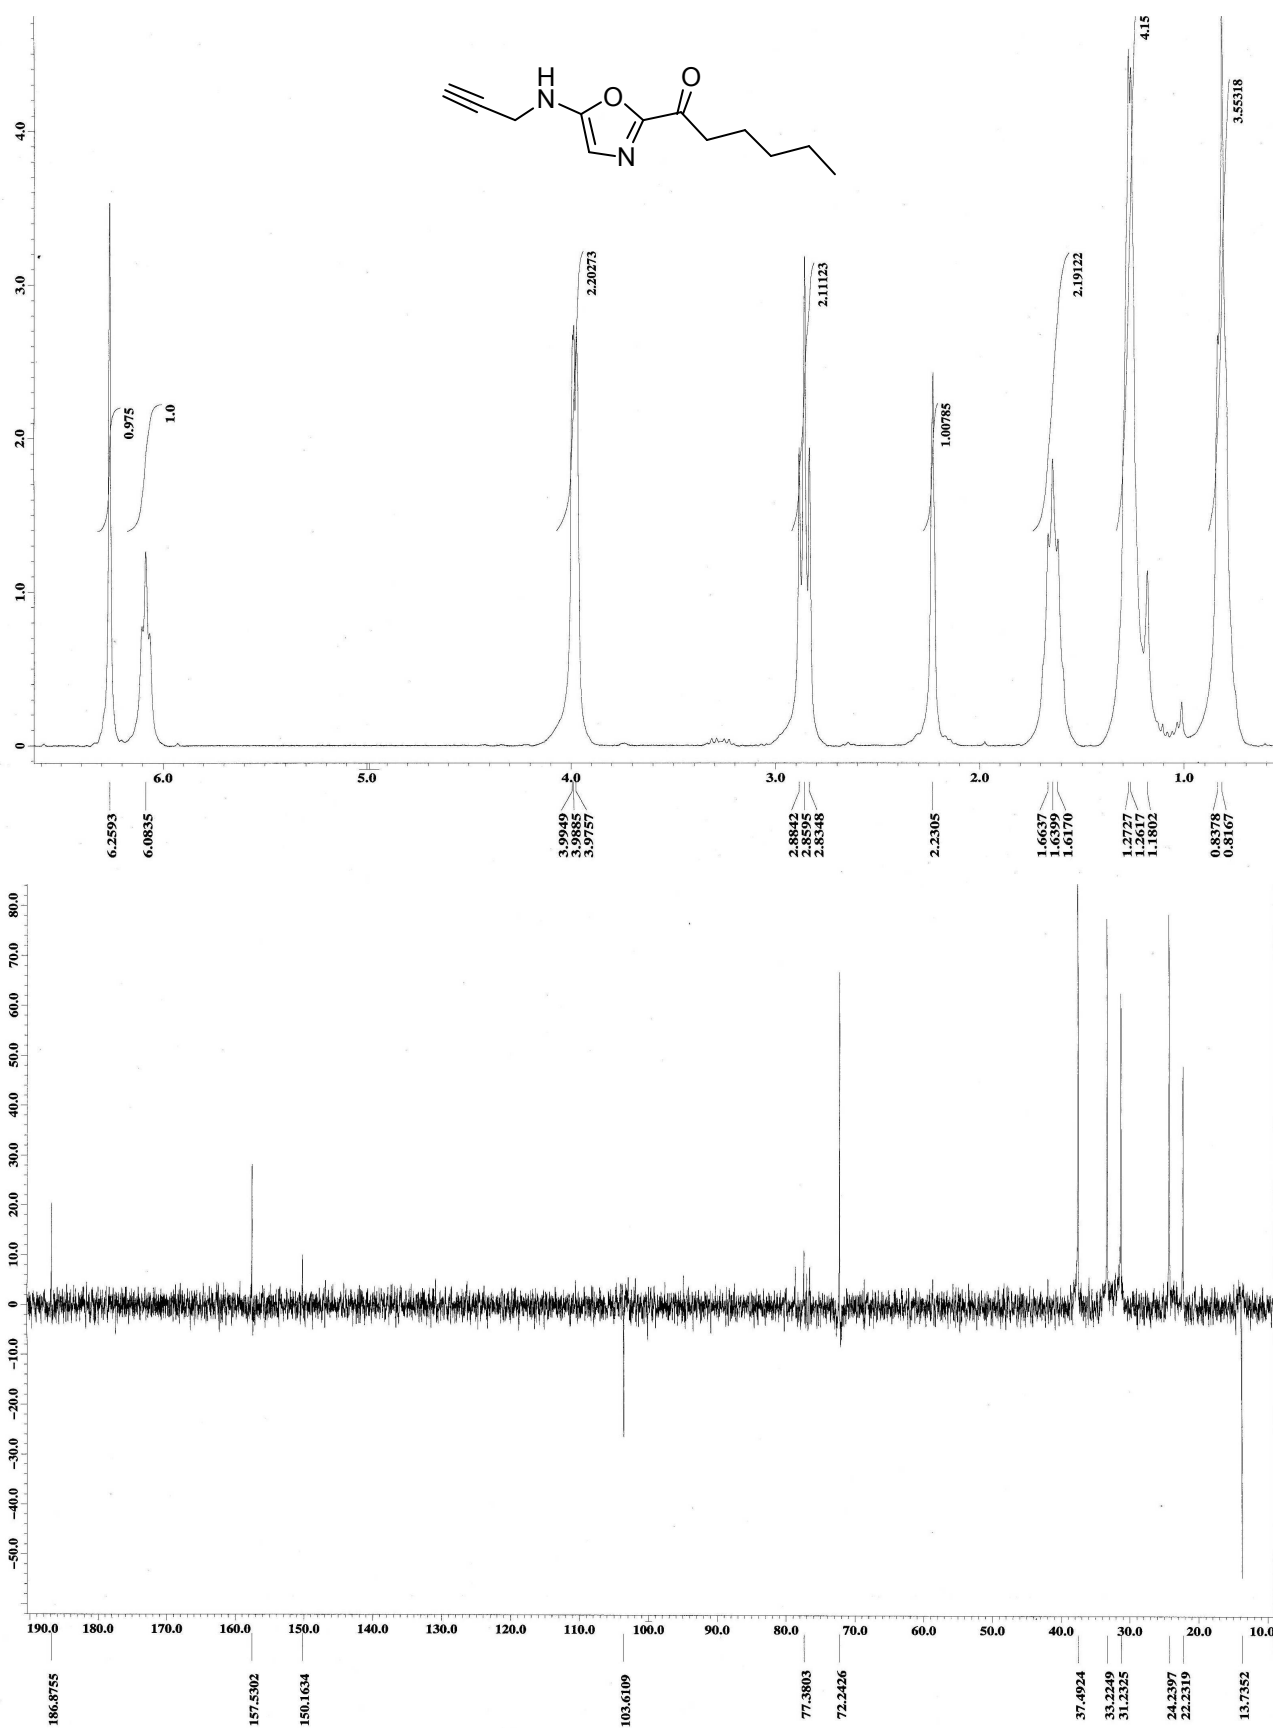

5j

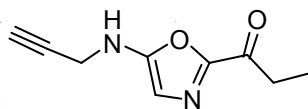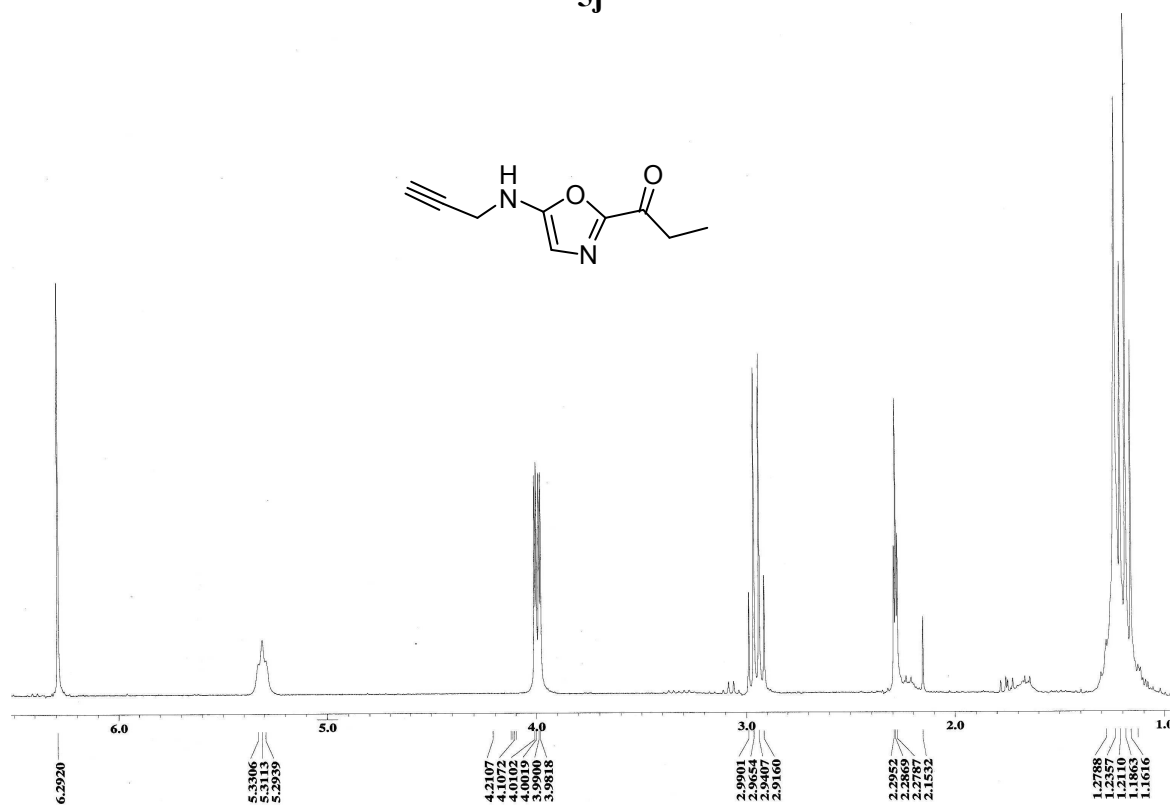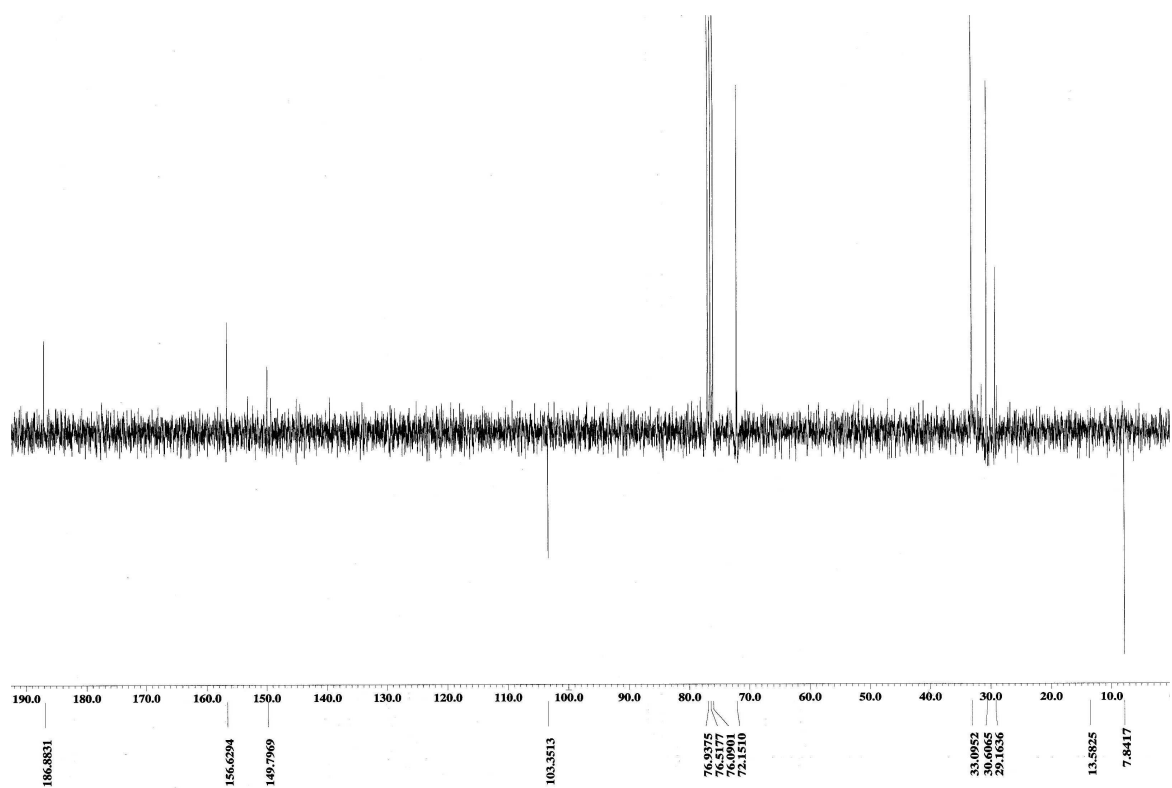

5k

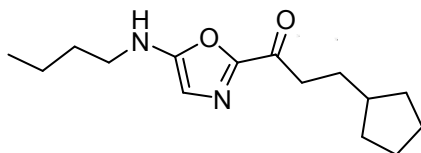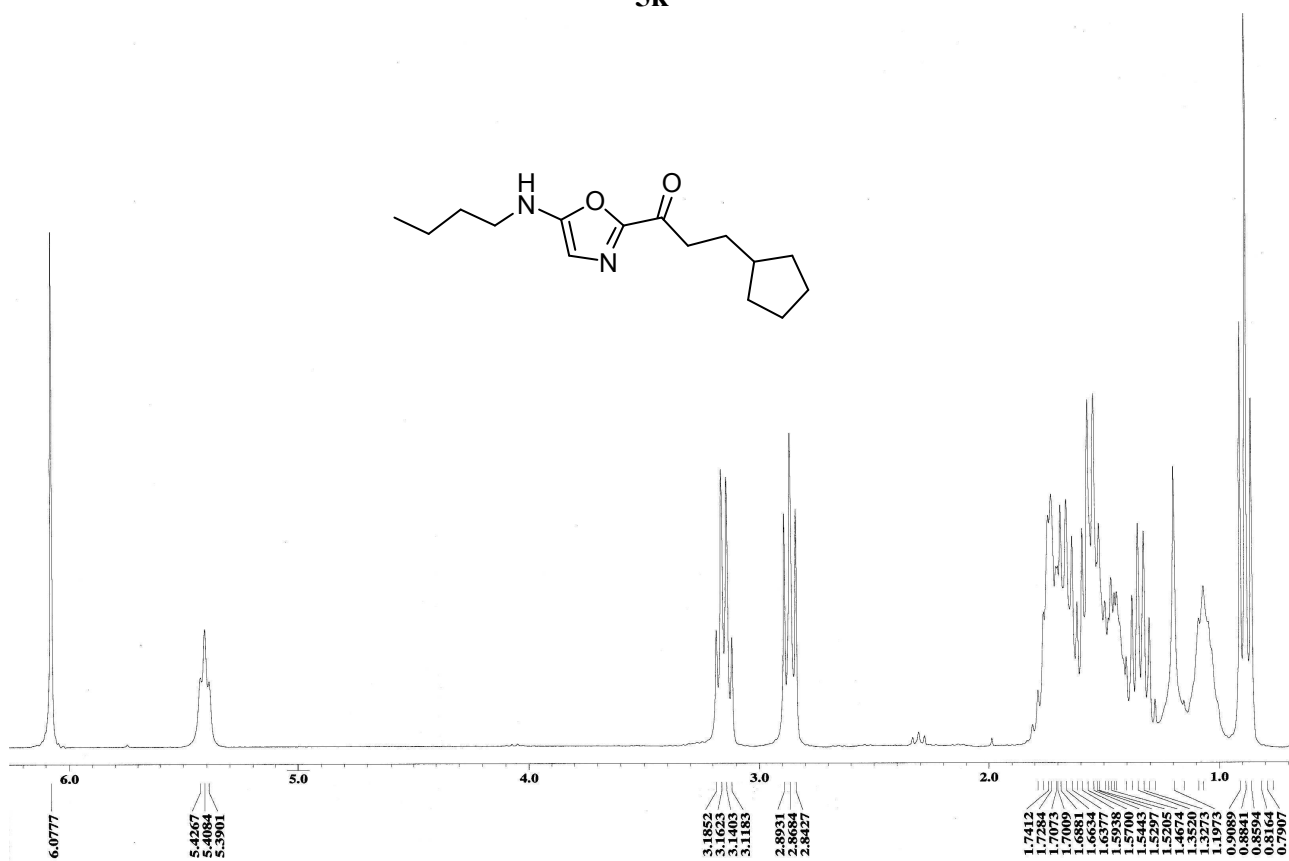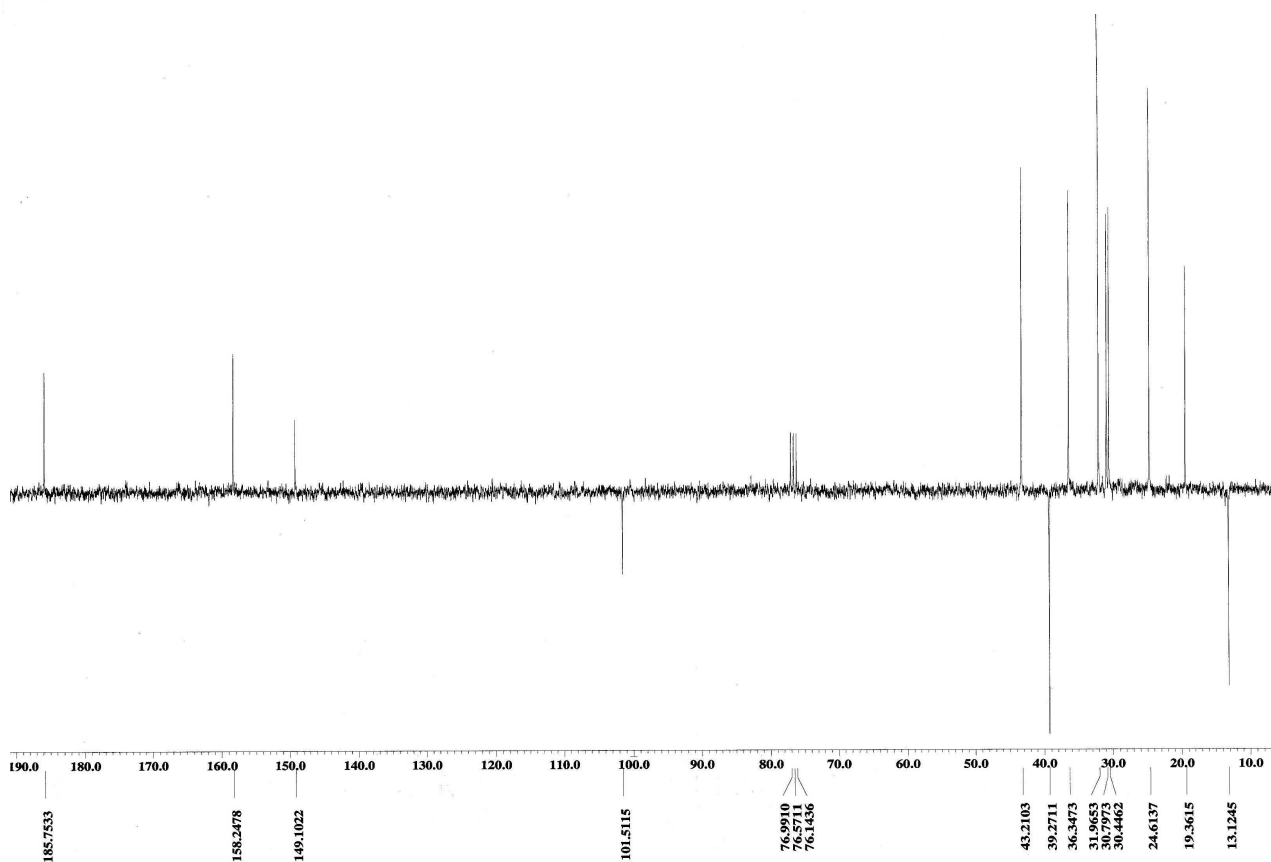



51

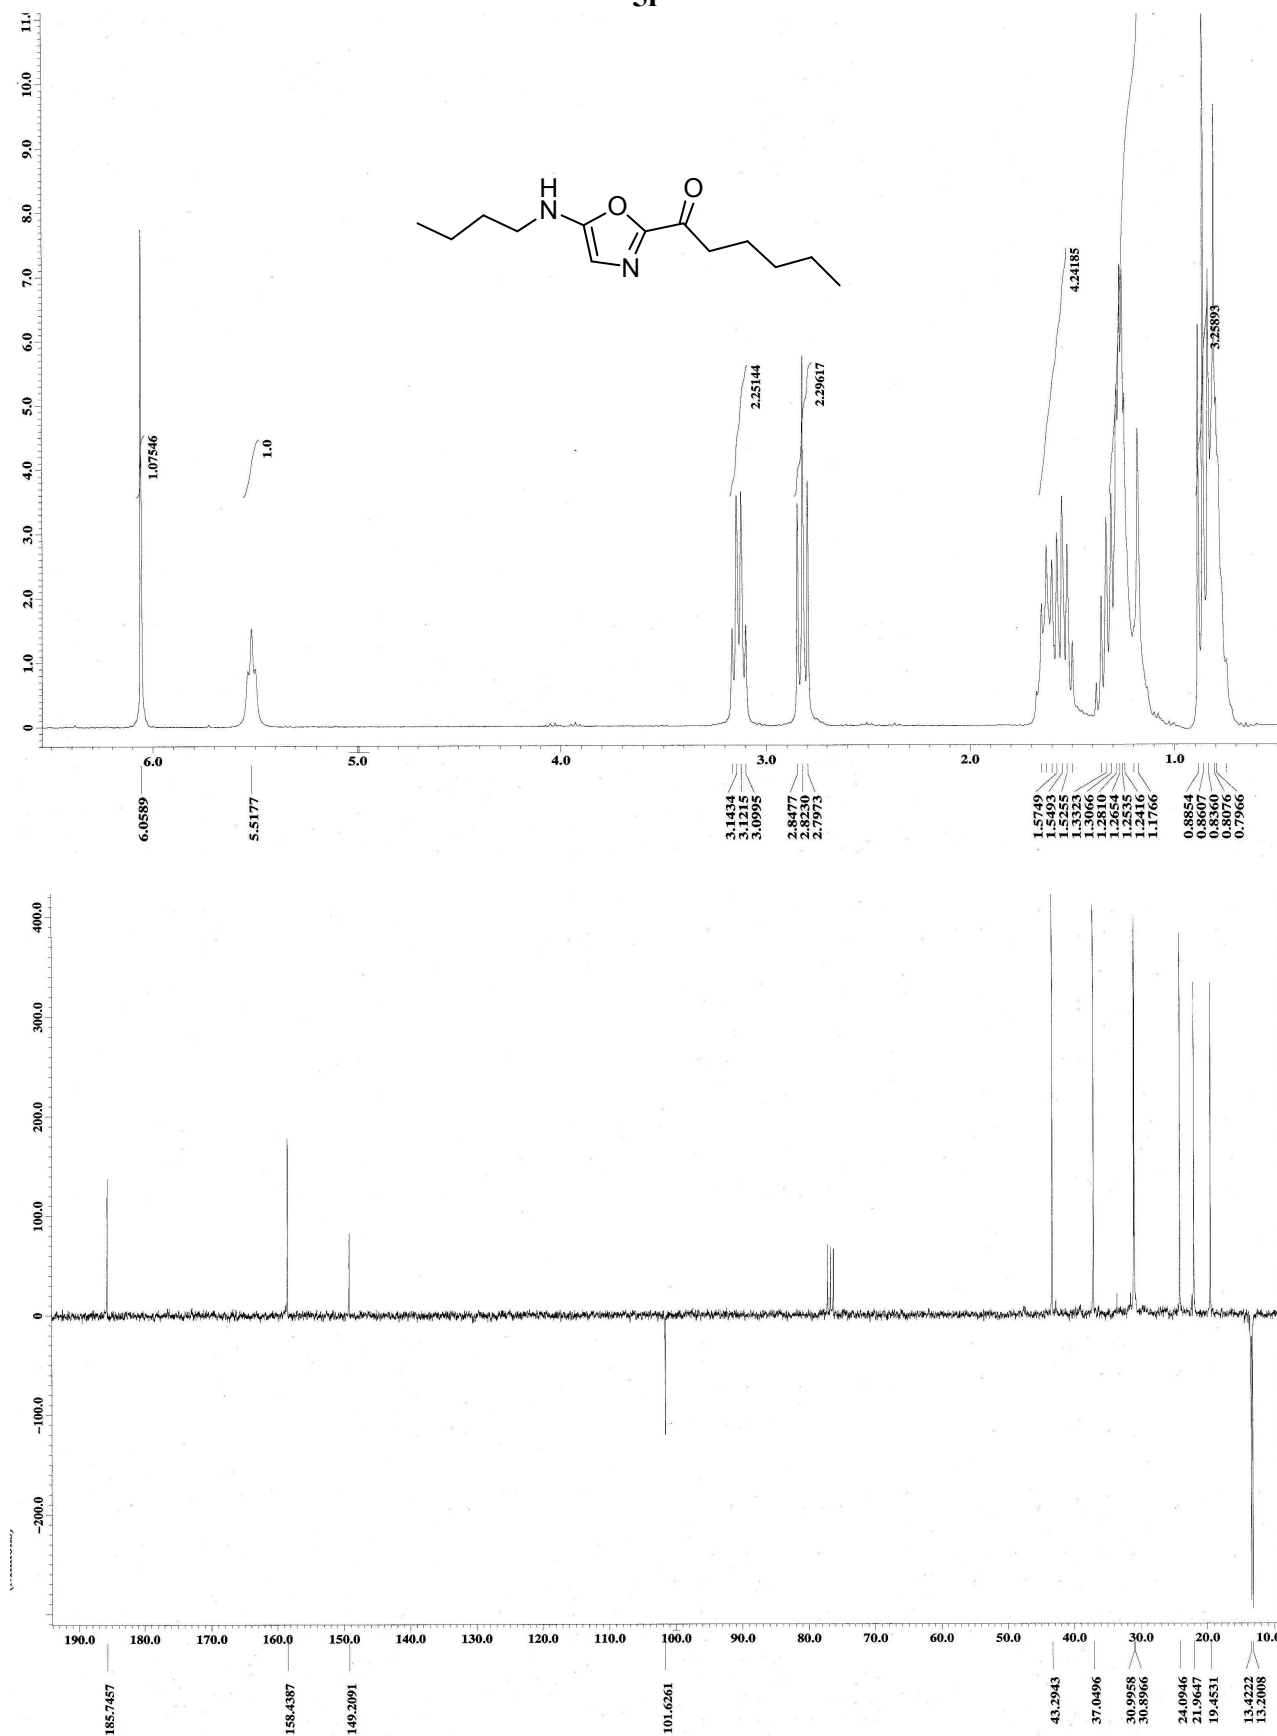

5m

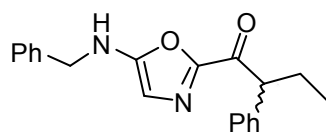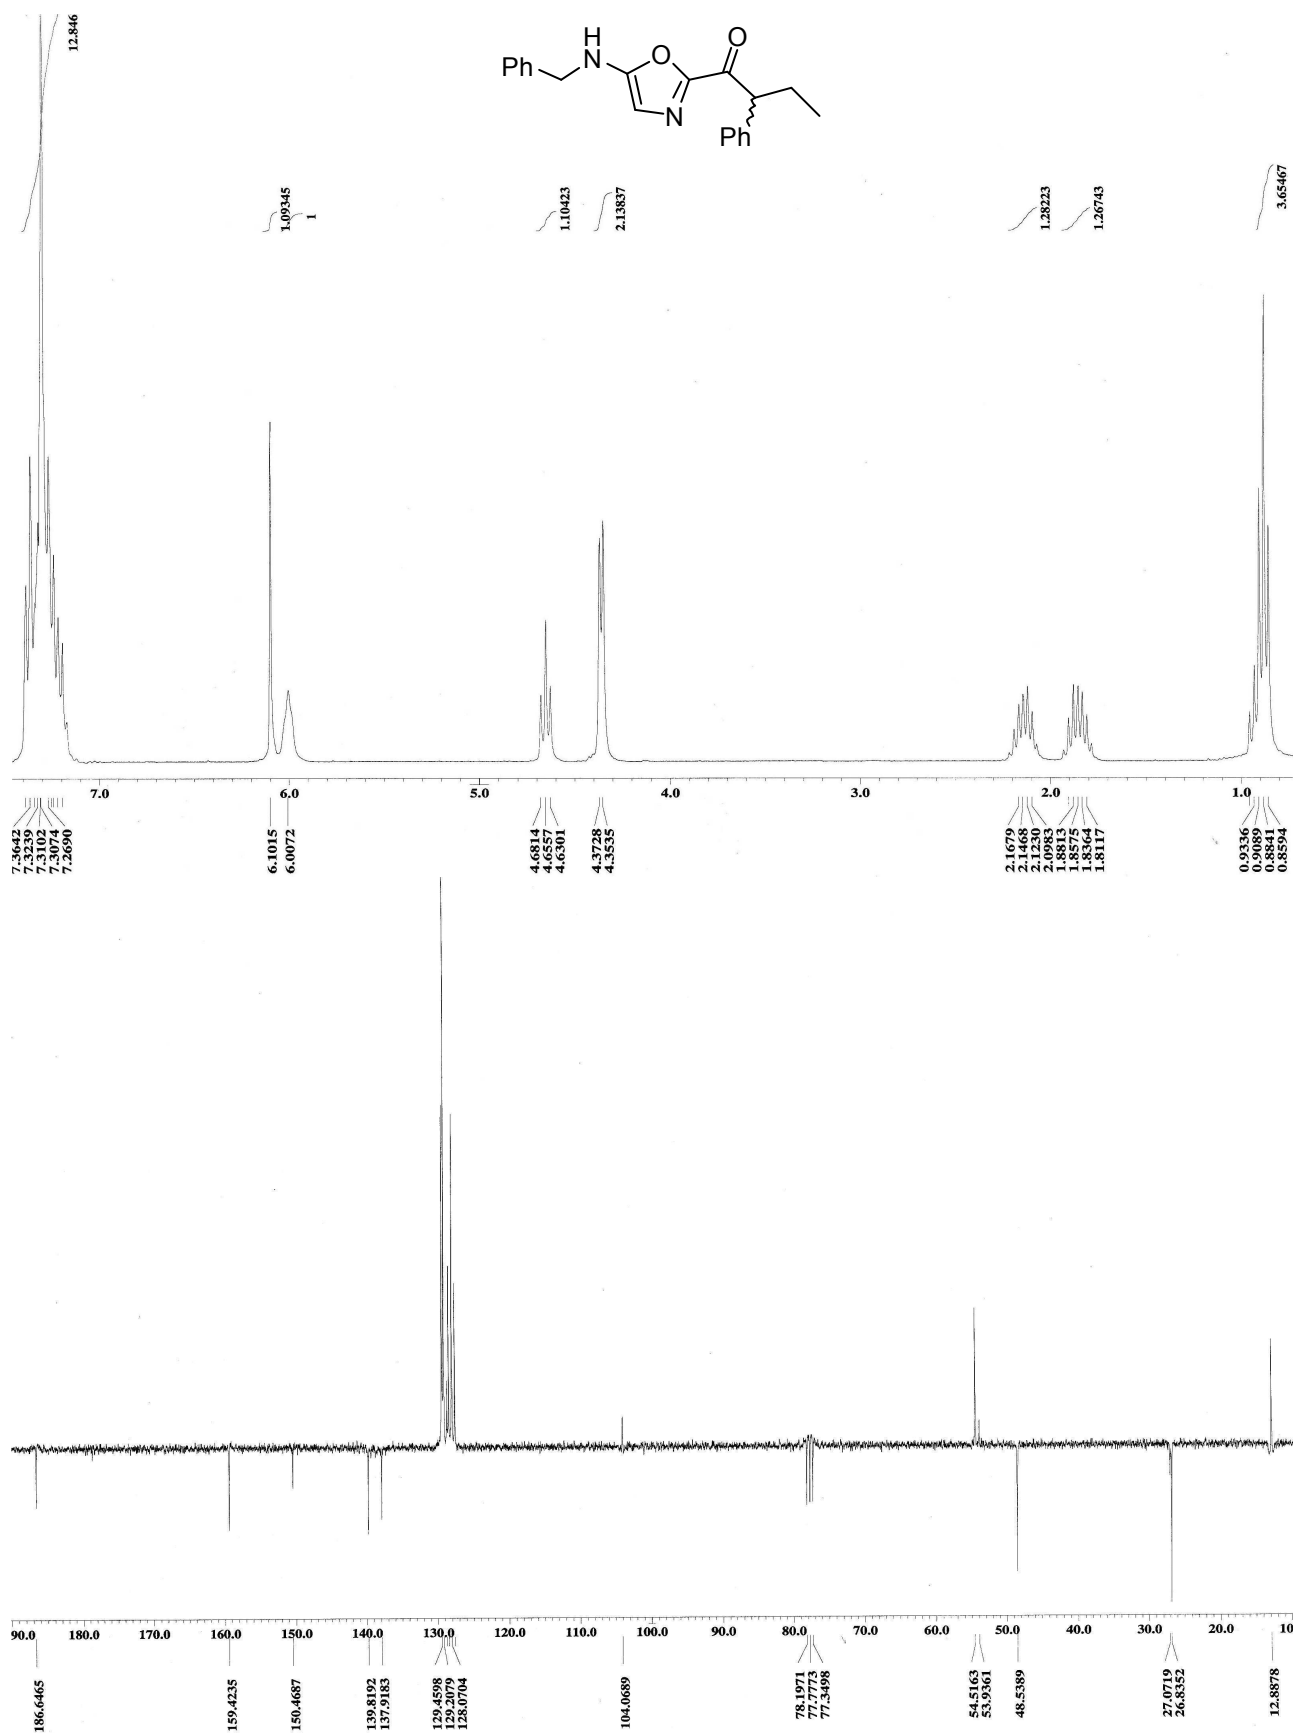

6a

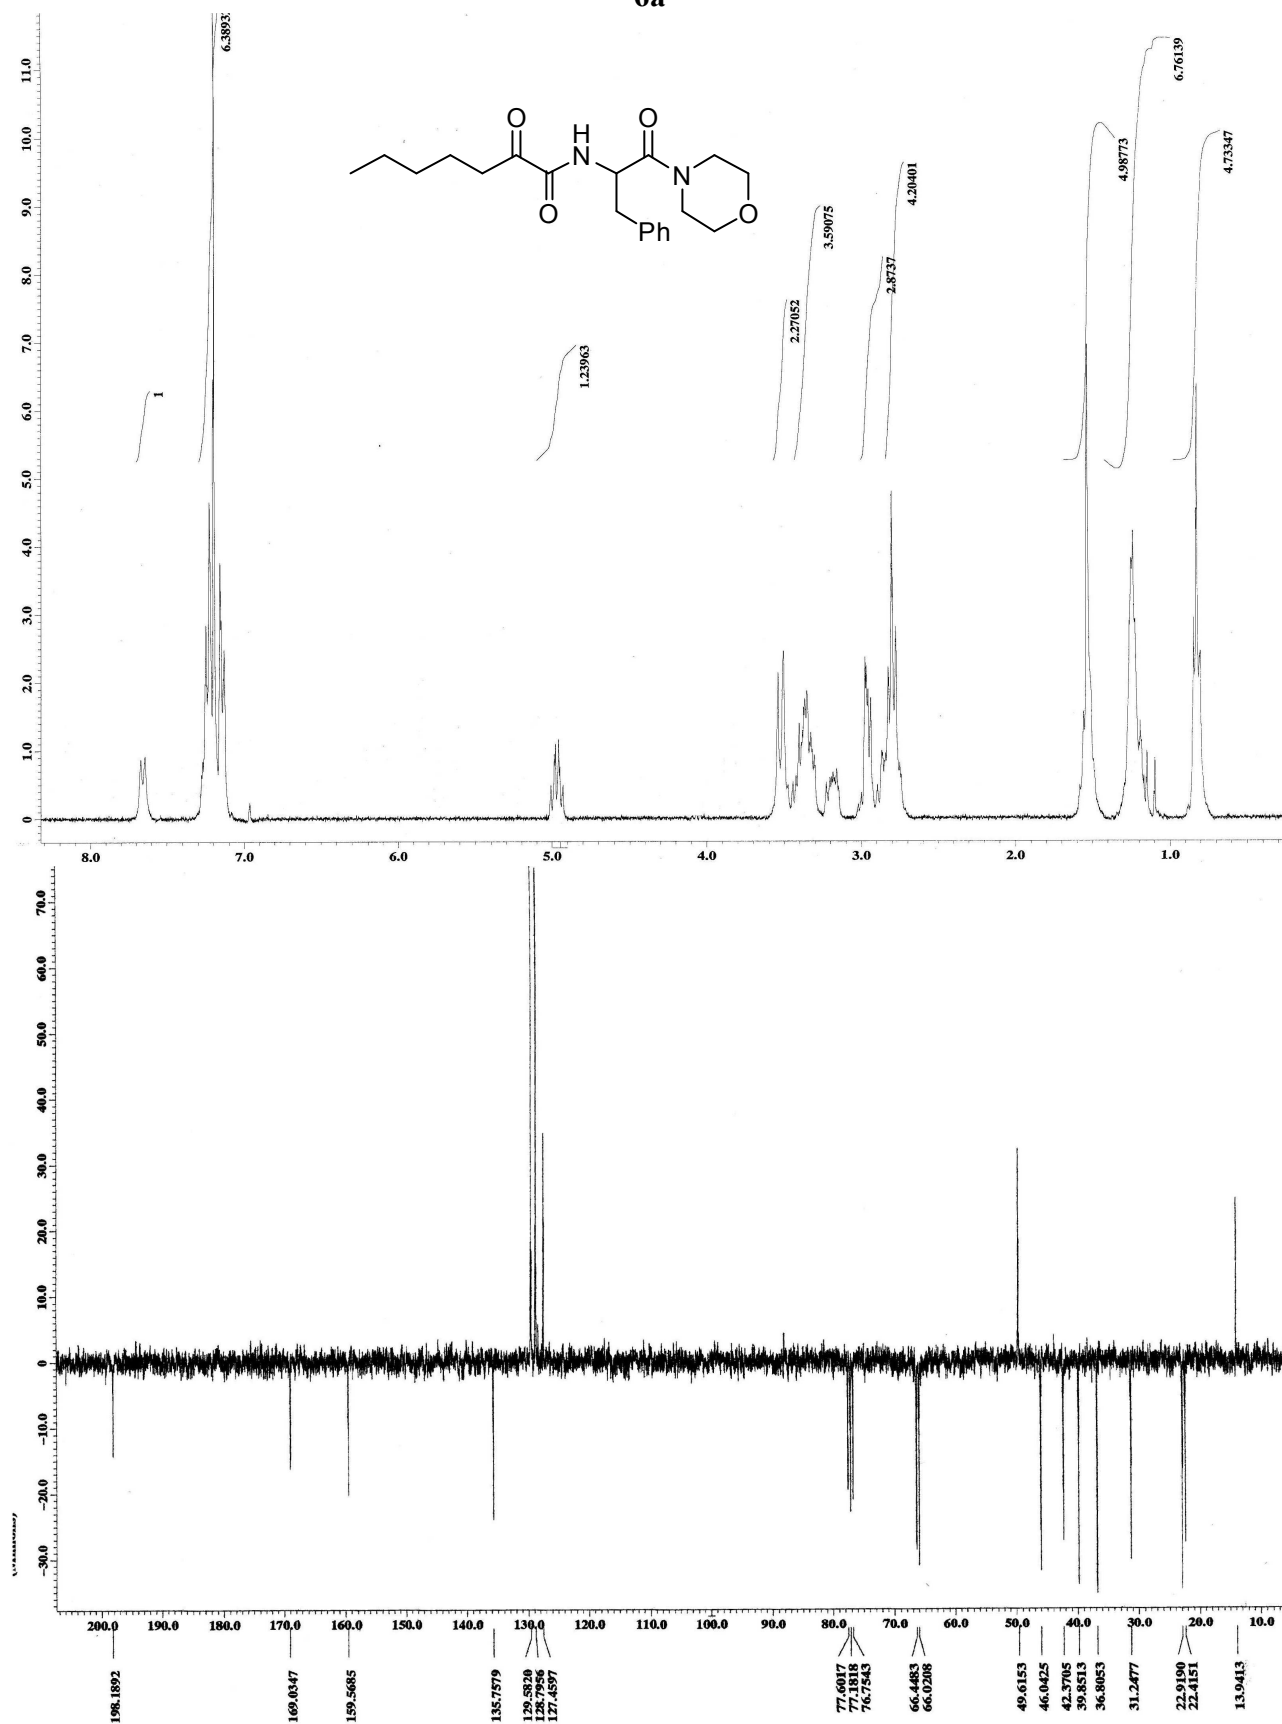

6b

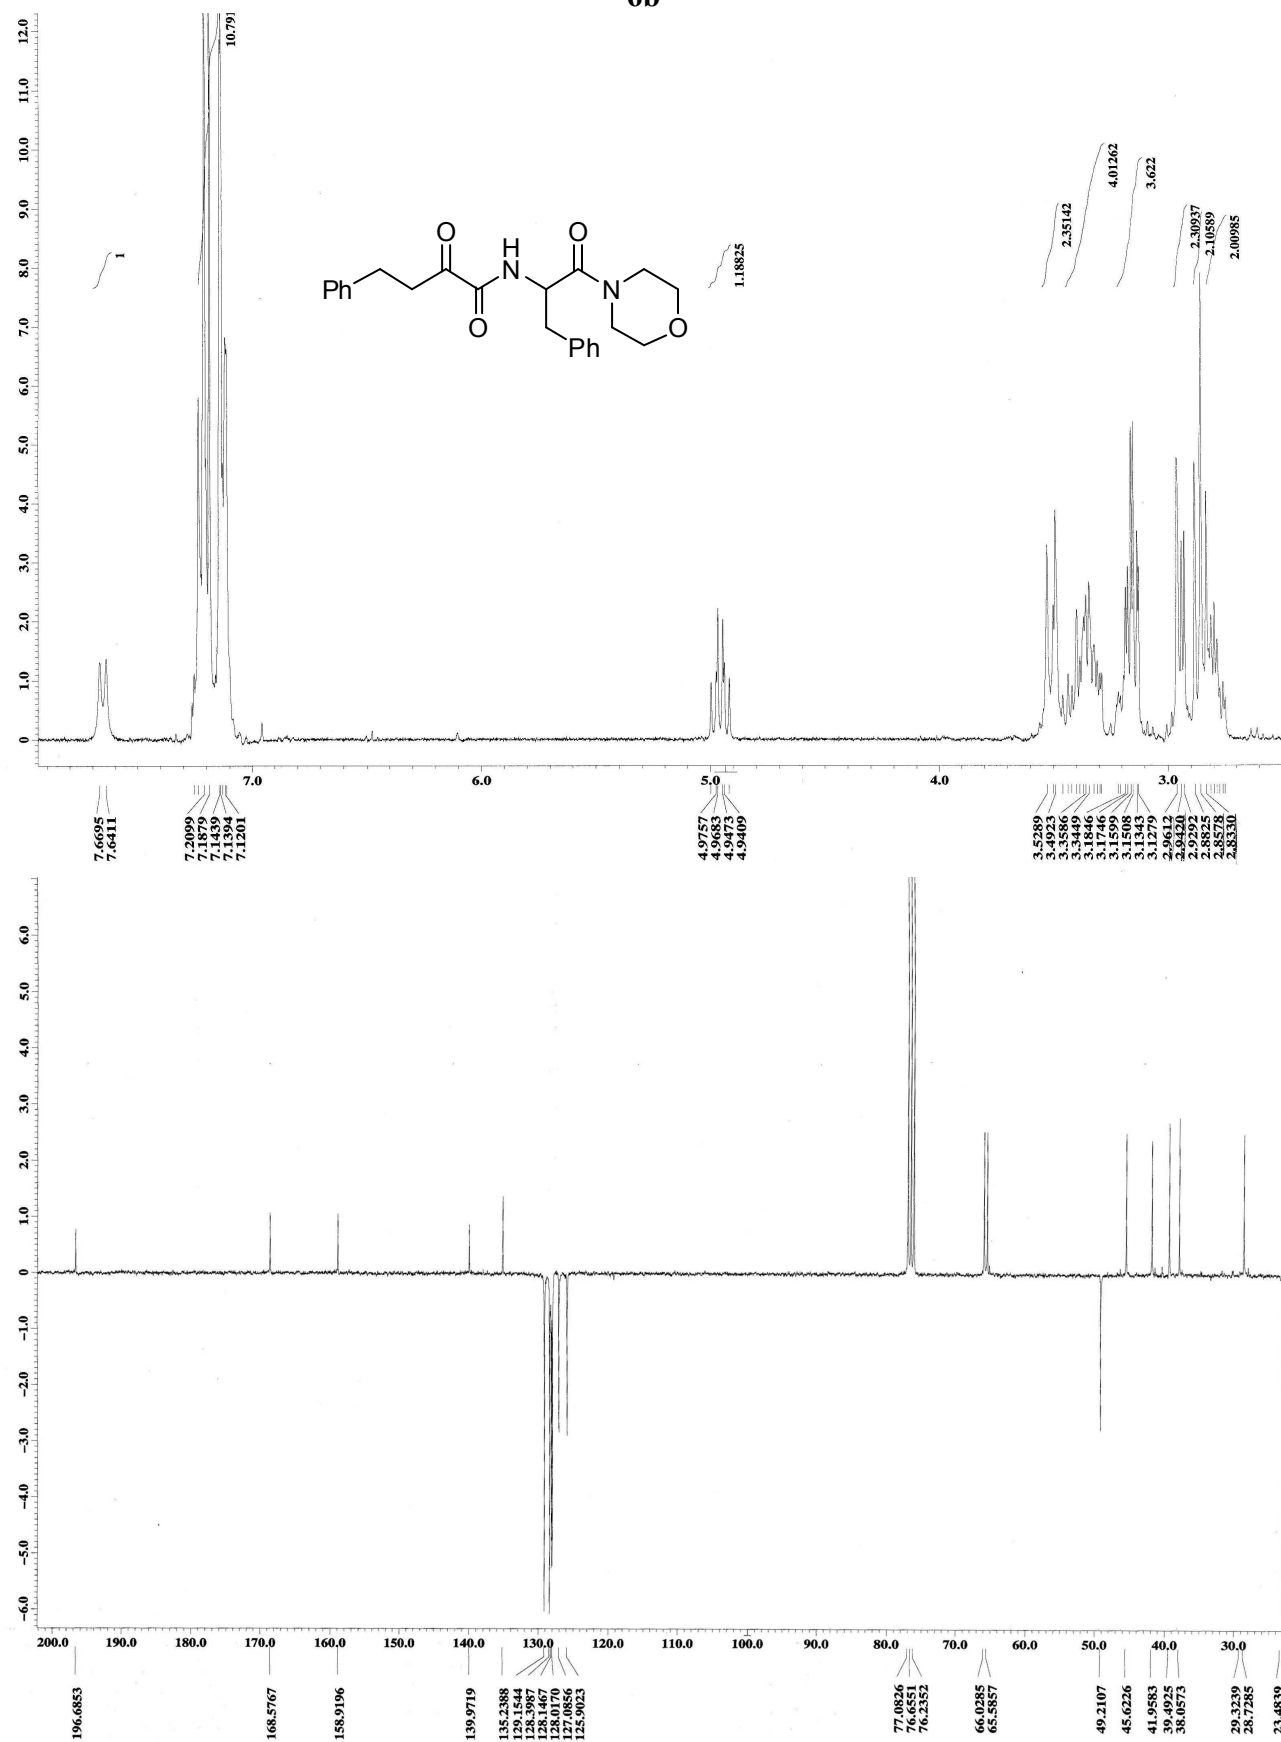

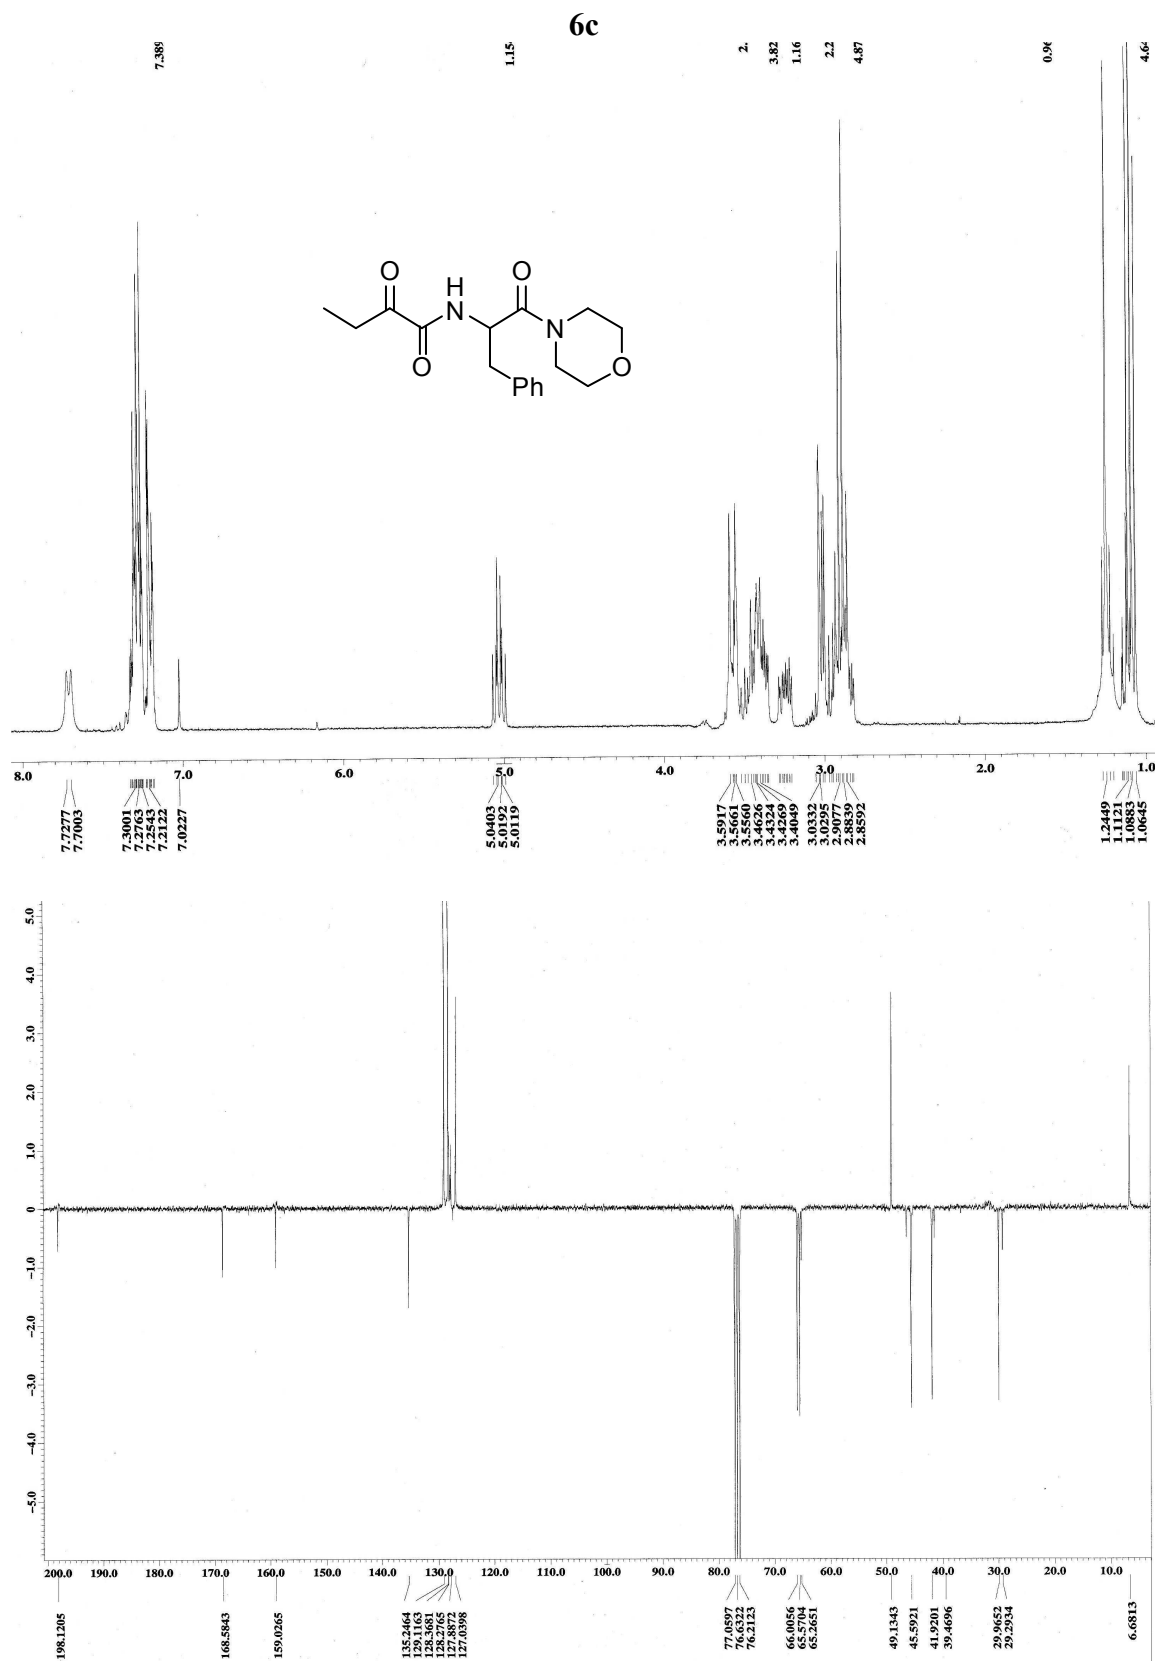

6d

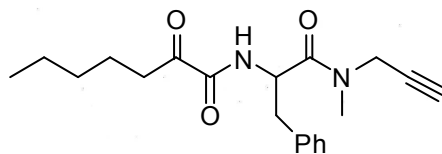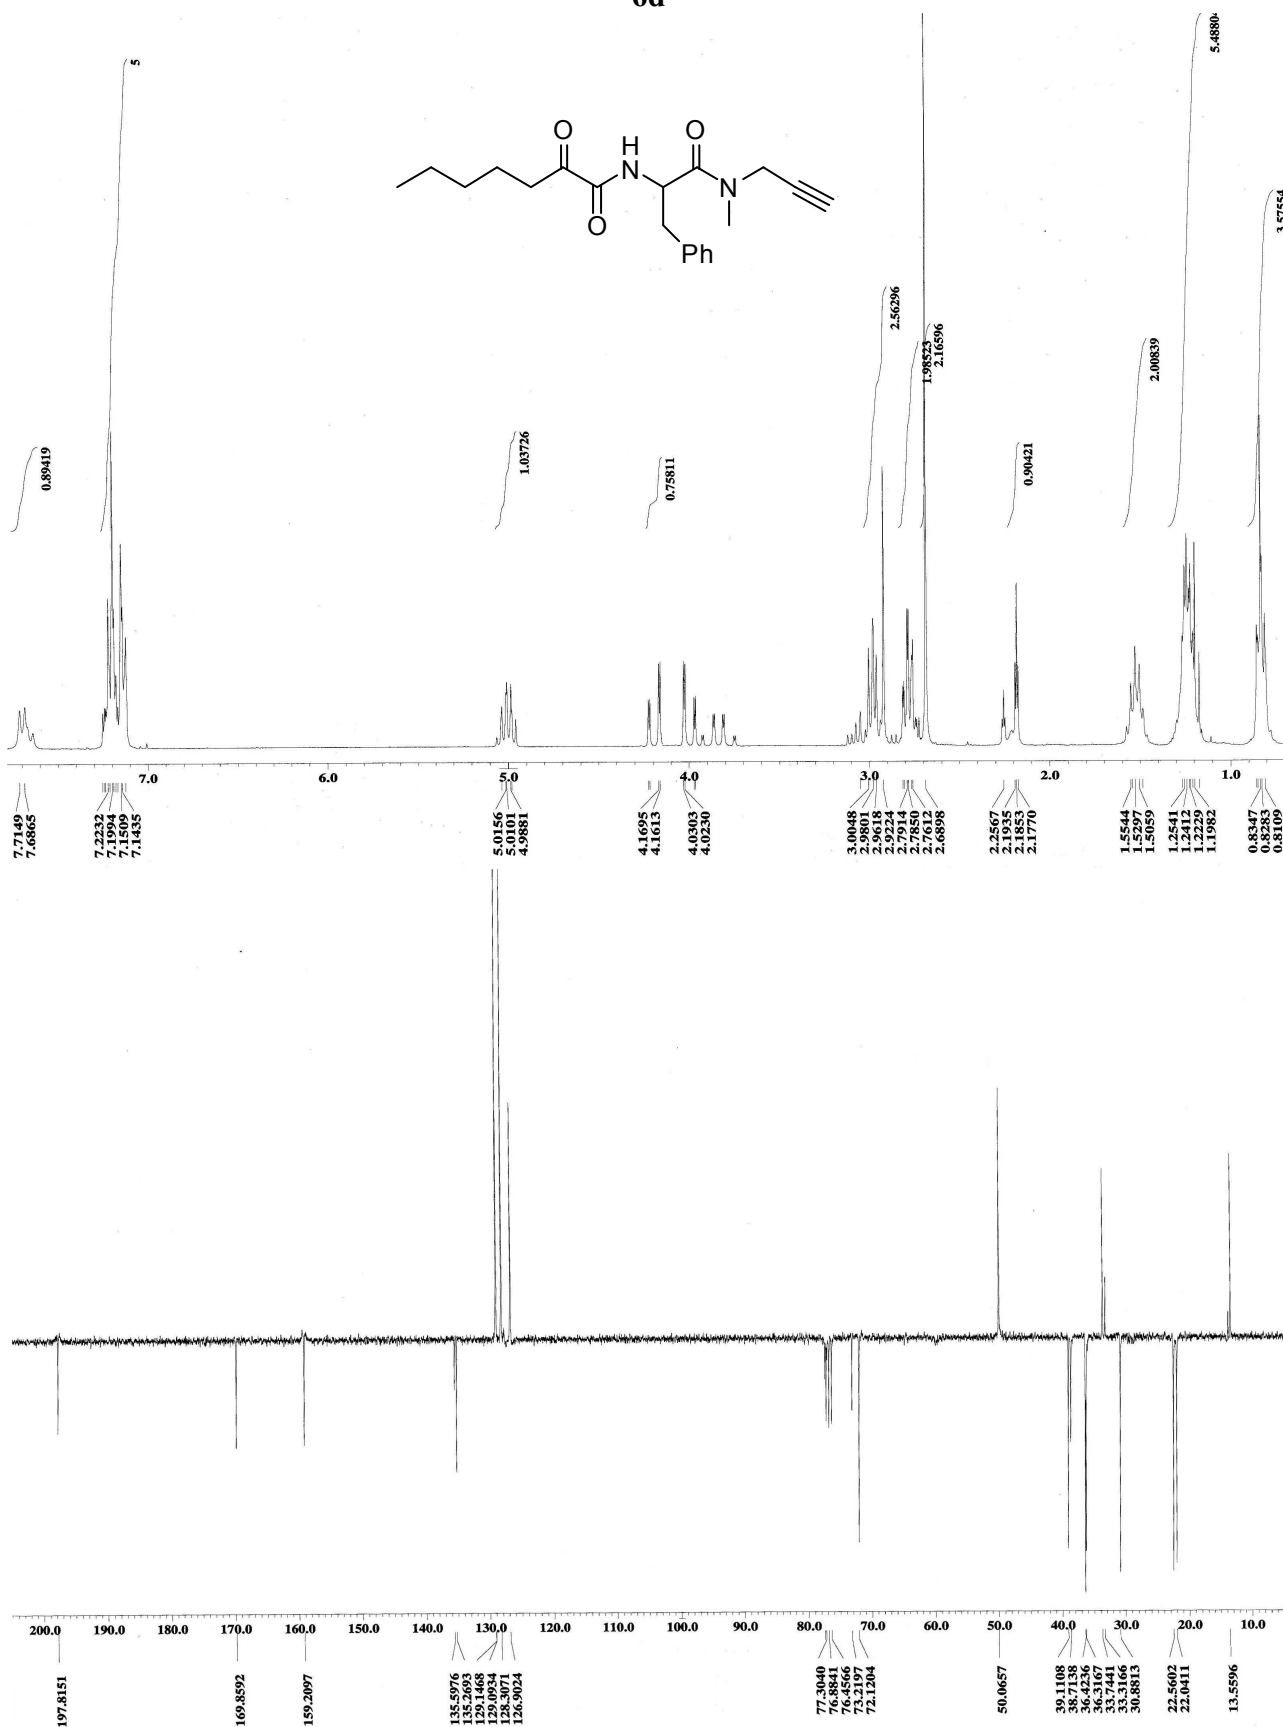

6e

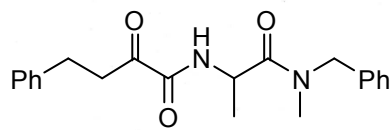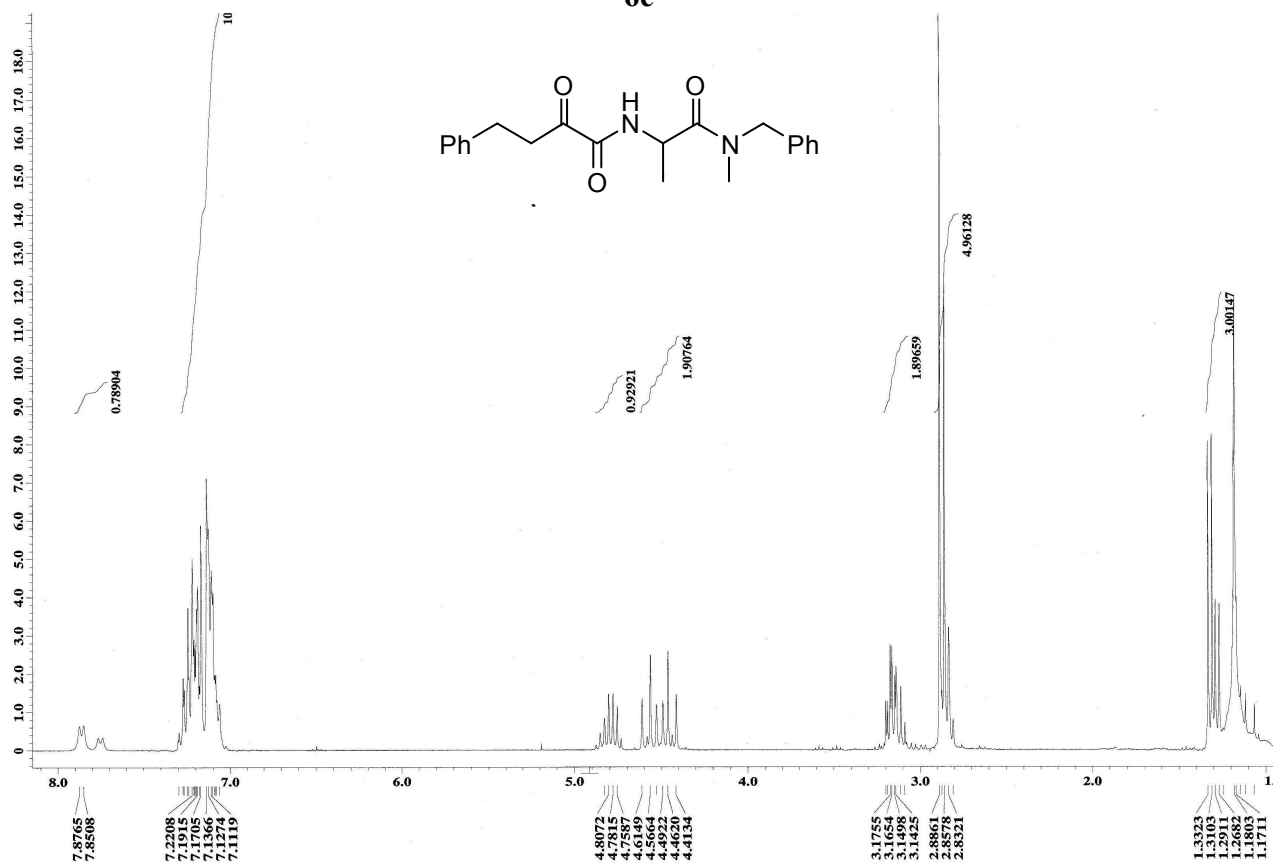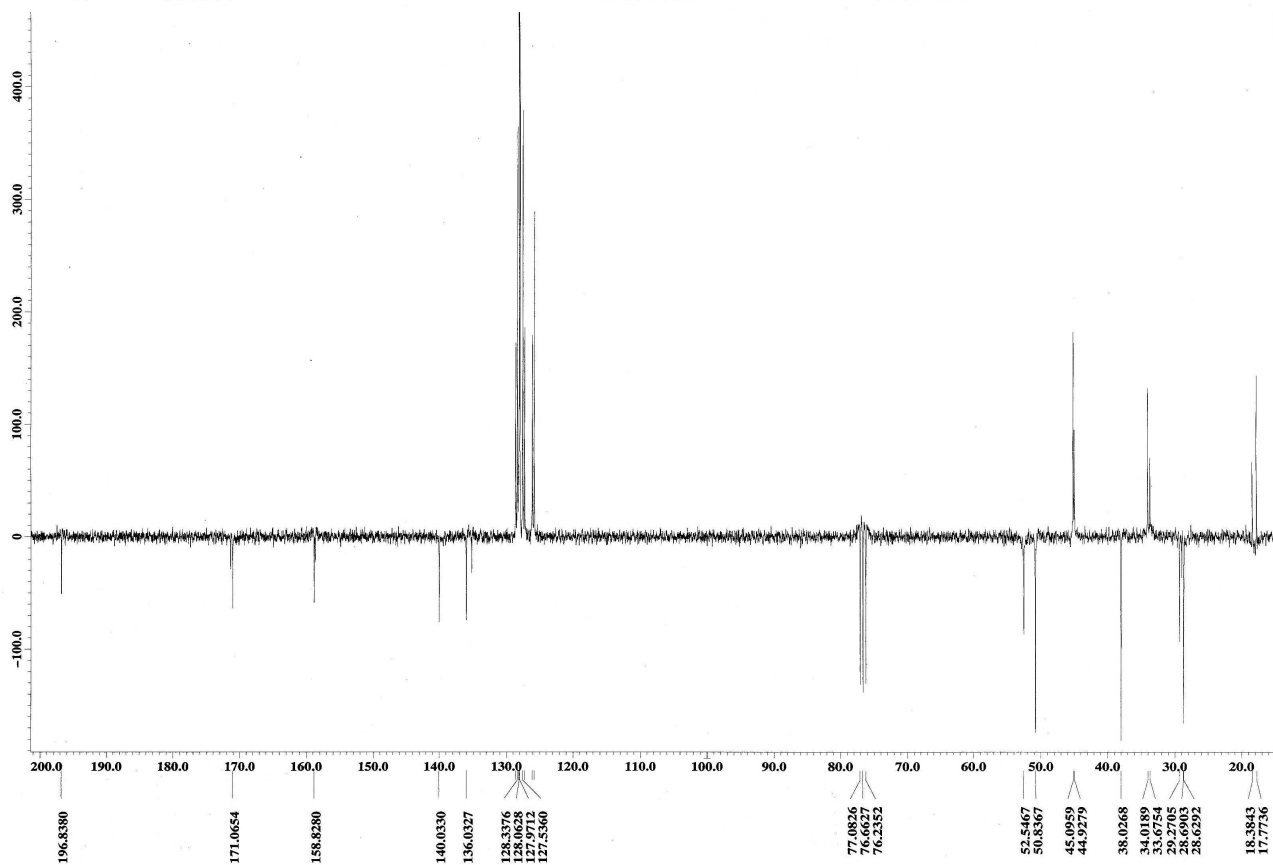

6f

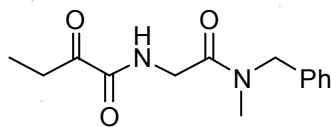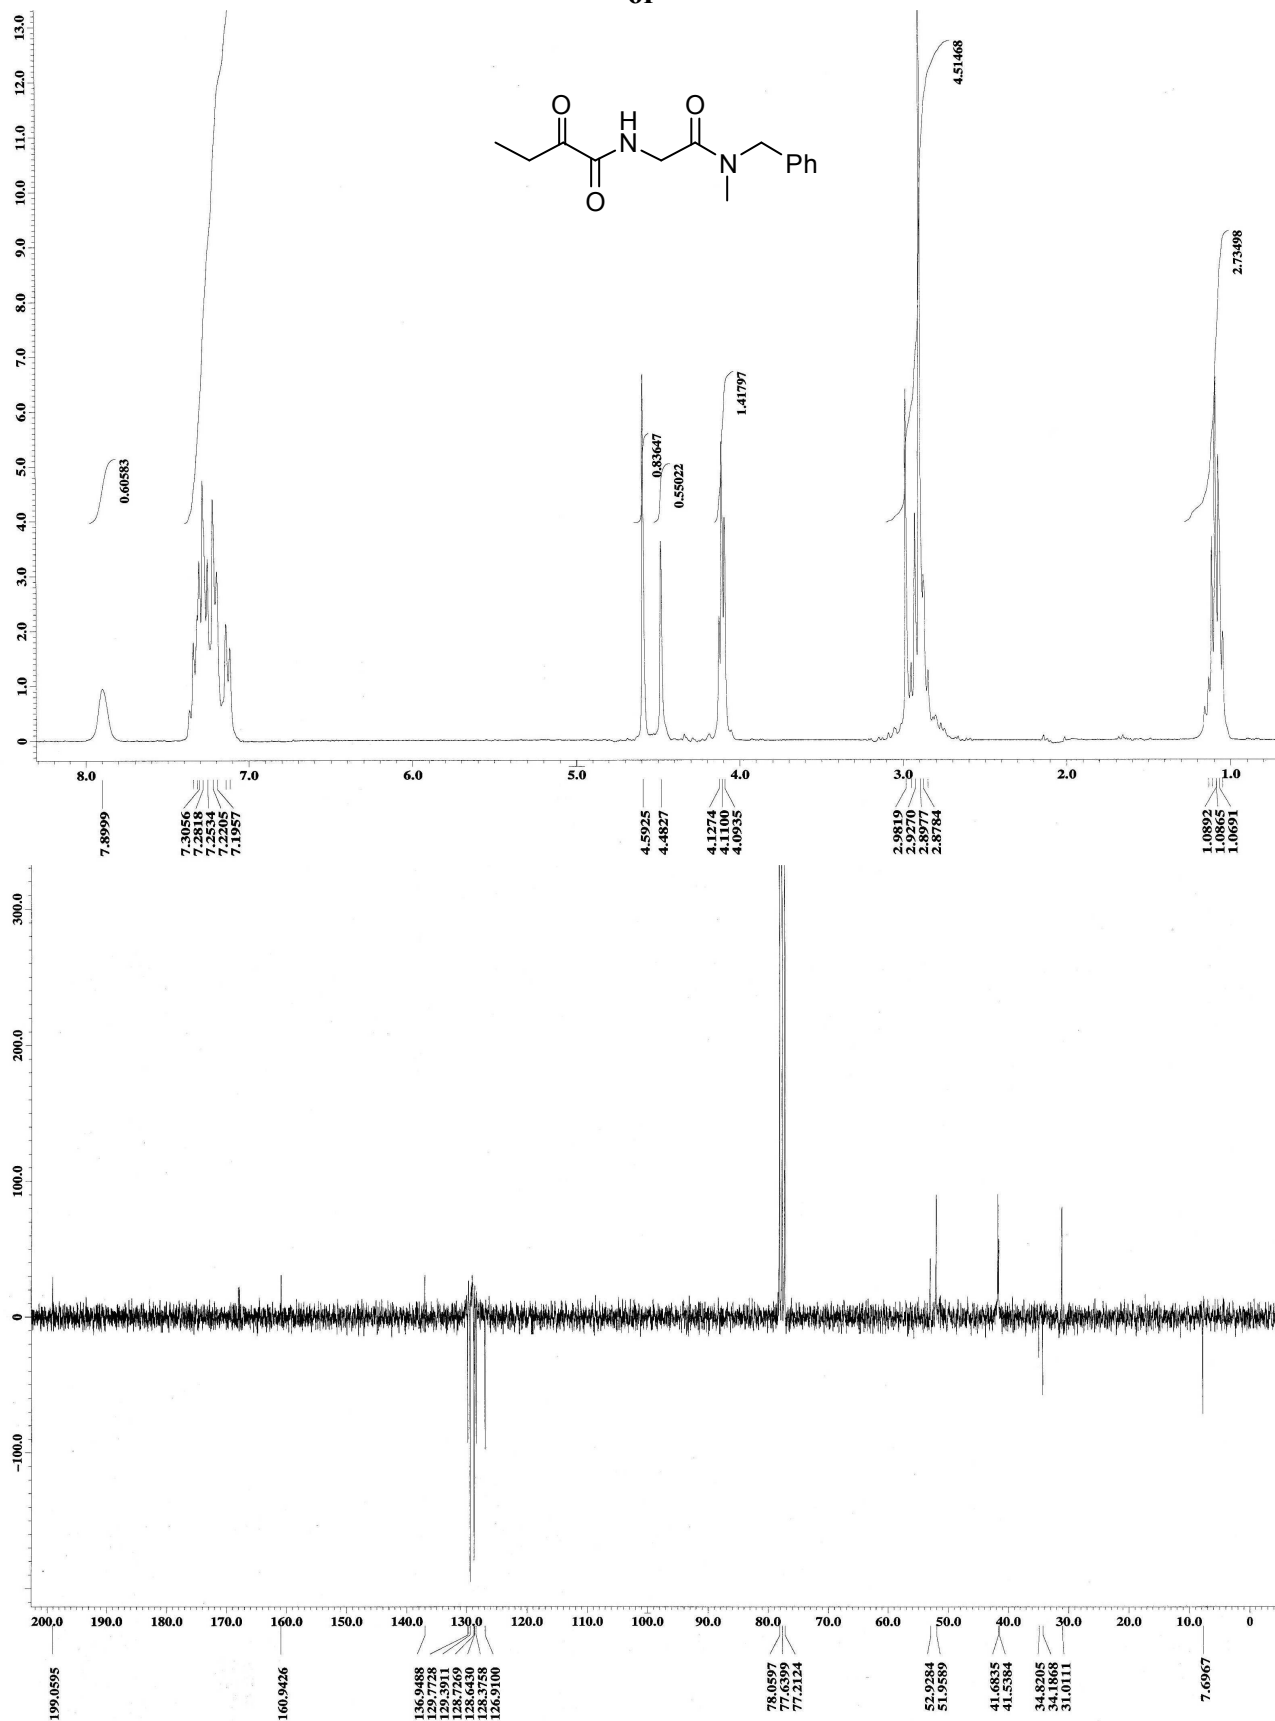



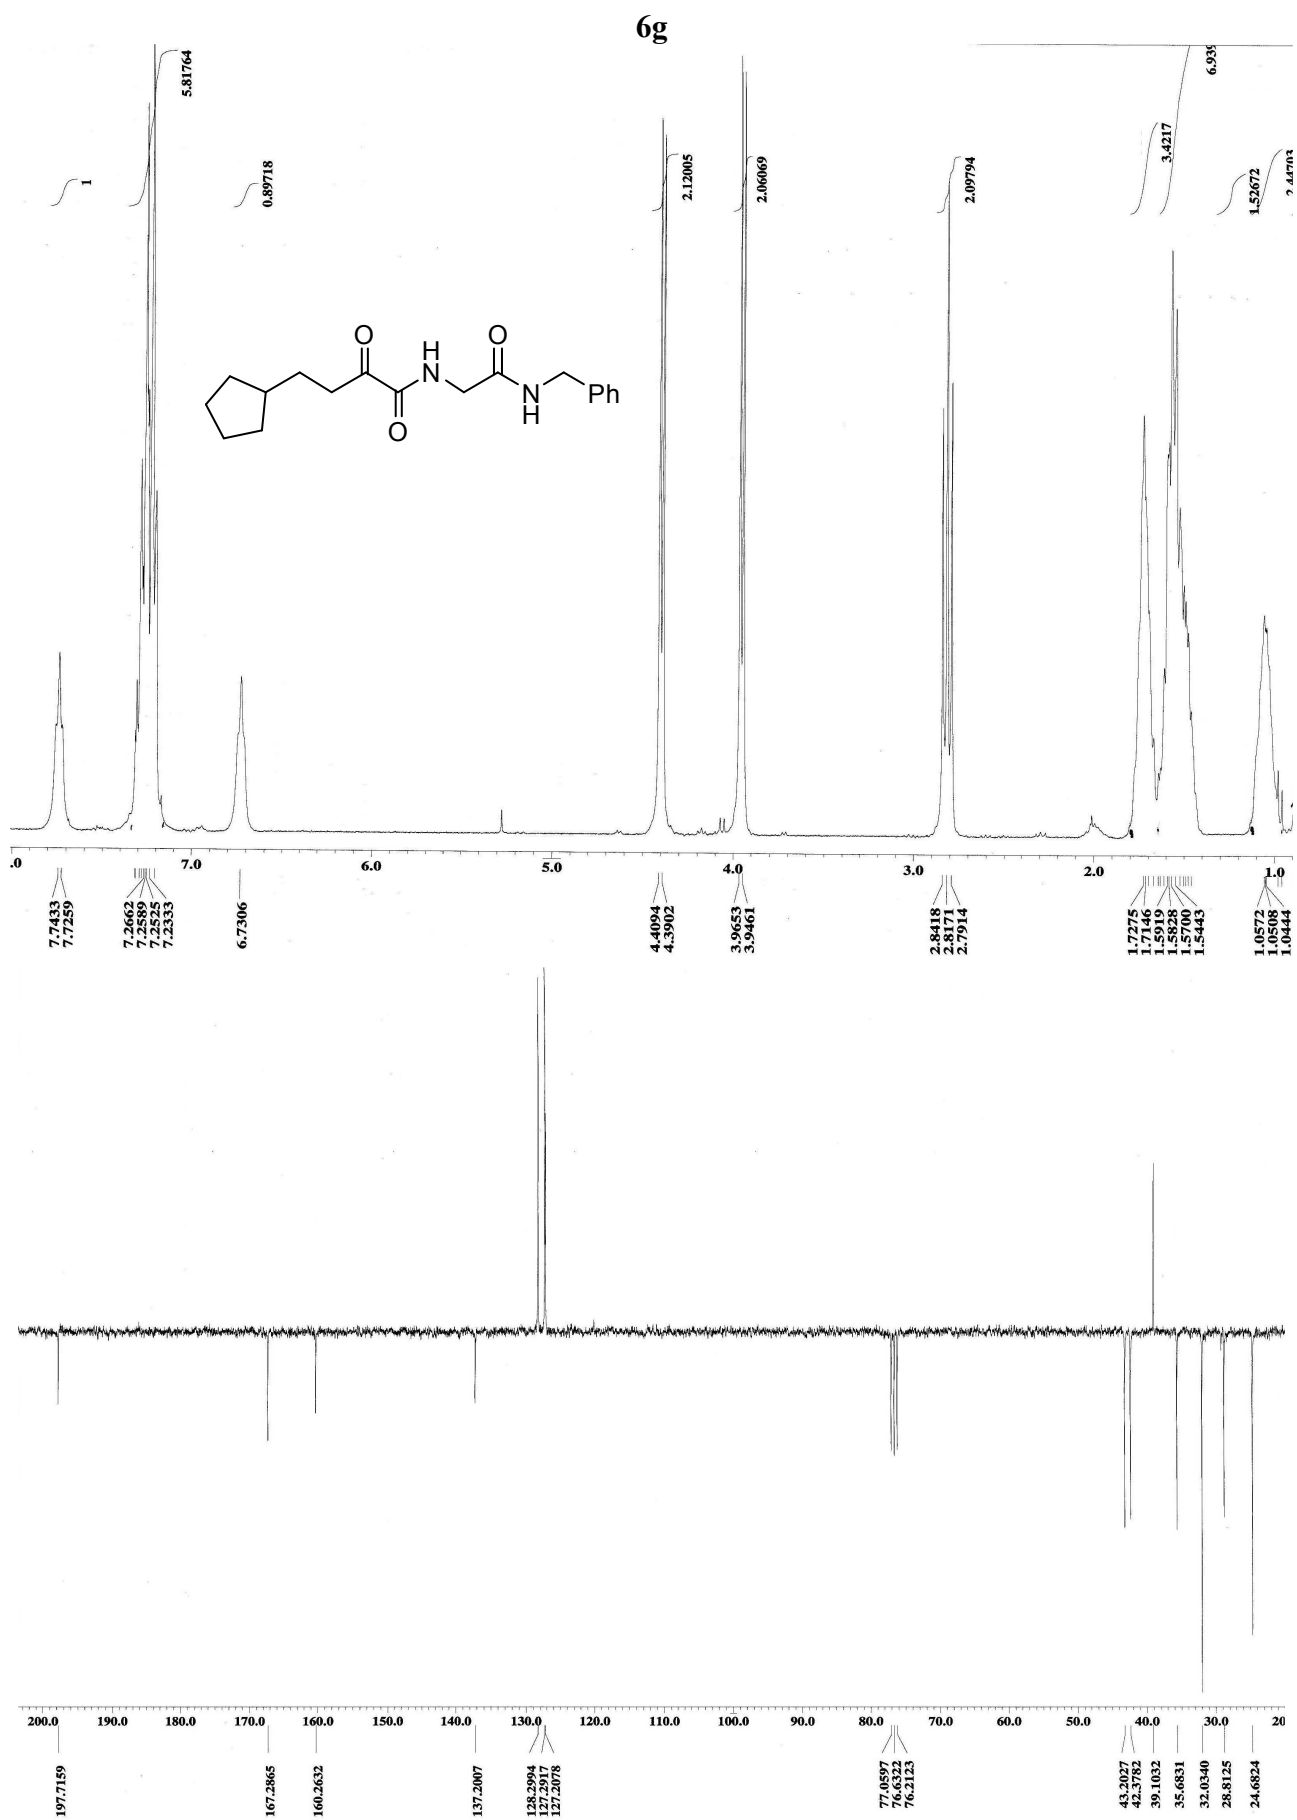

6h

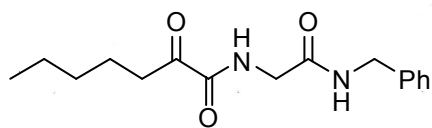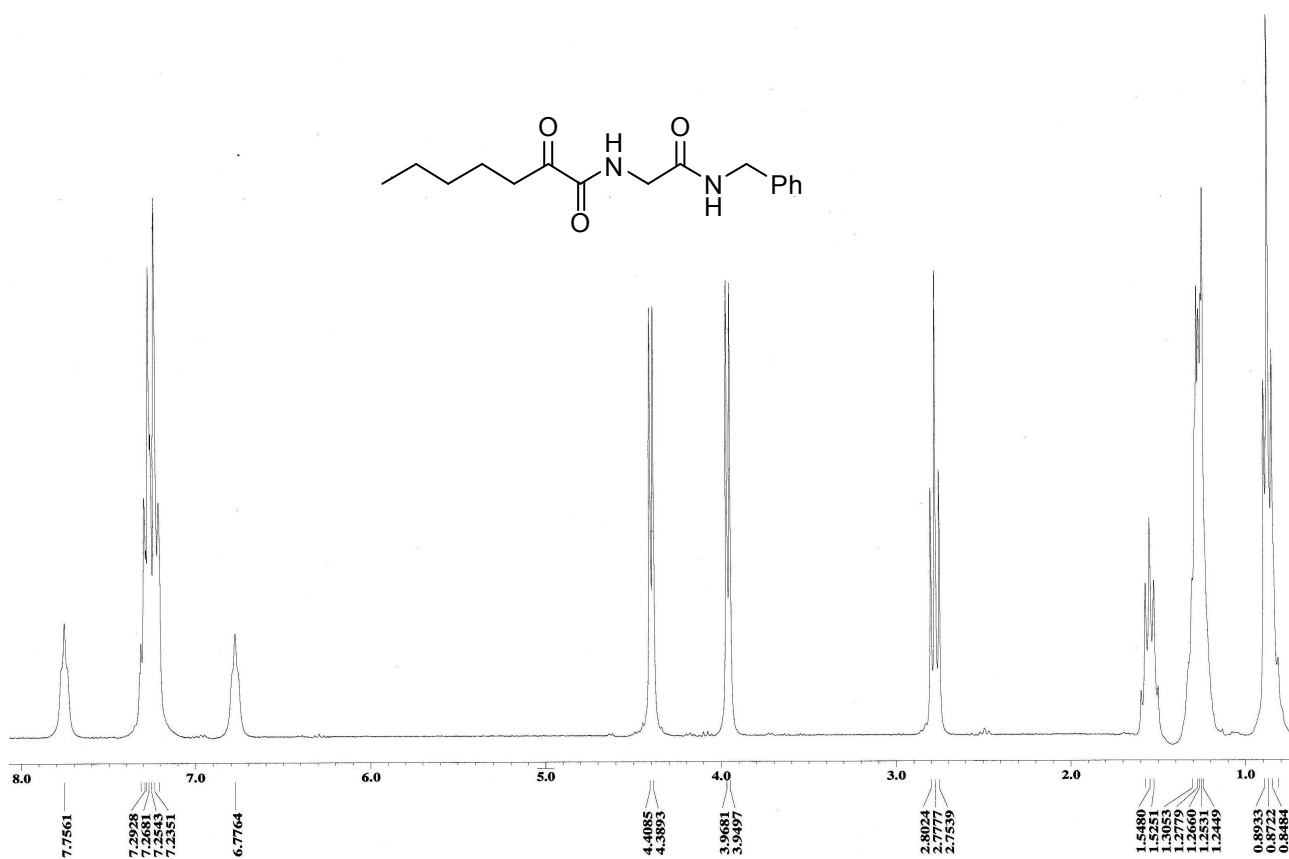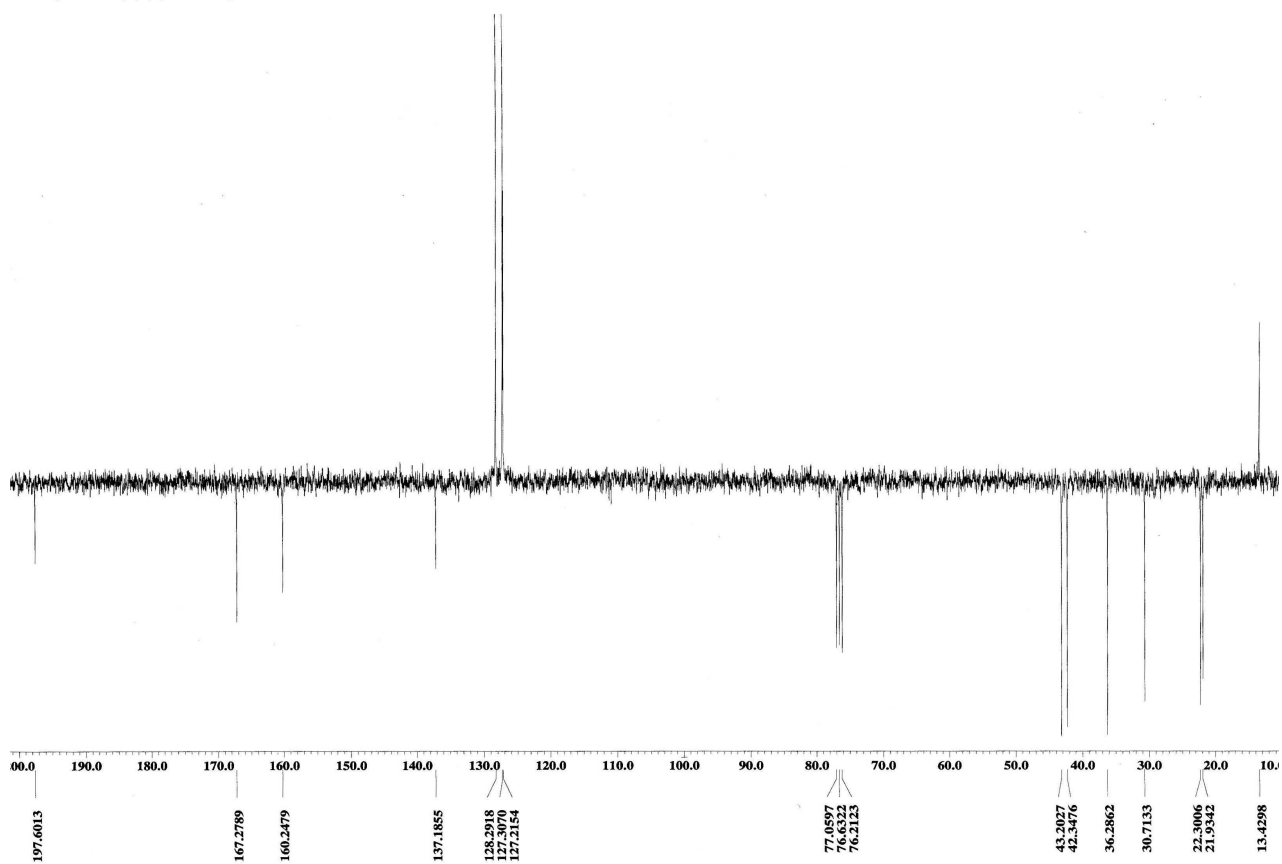

6i

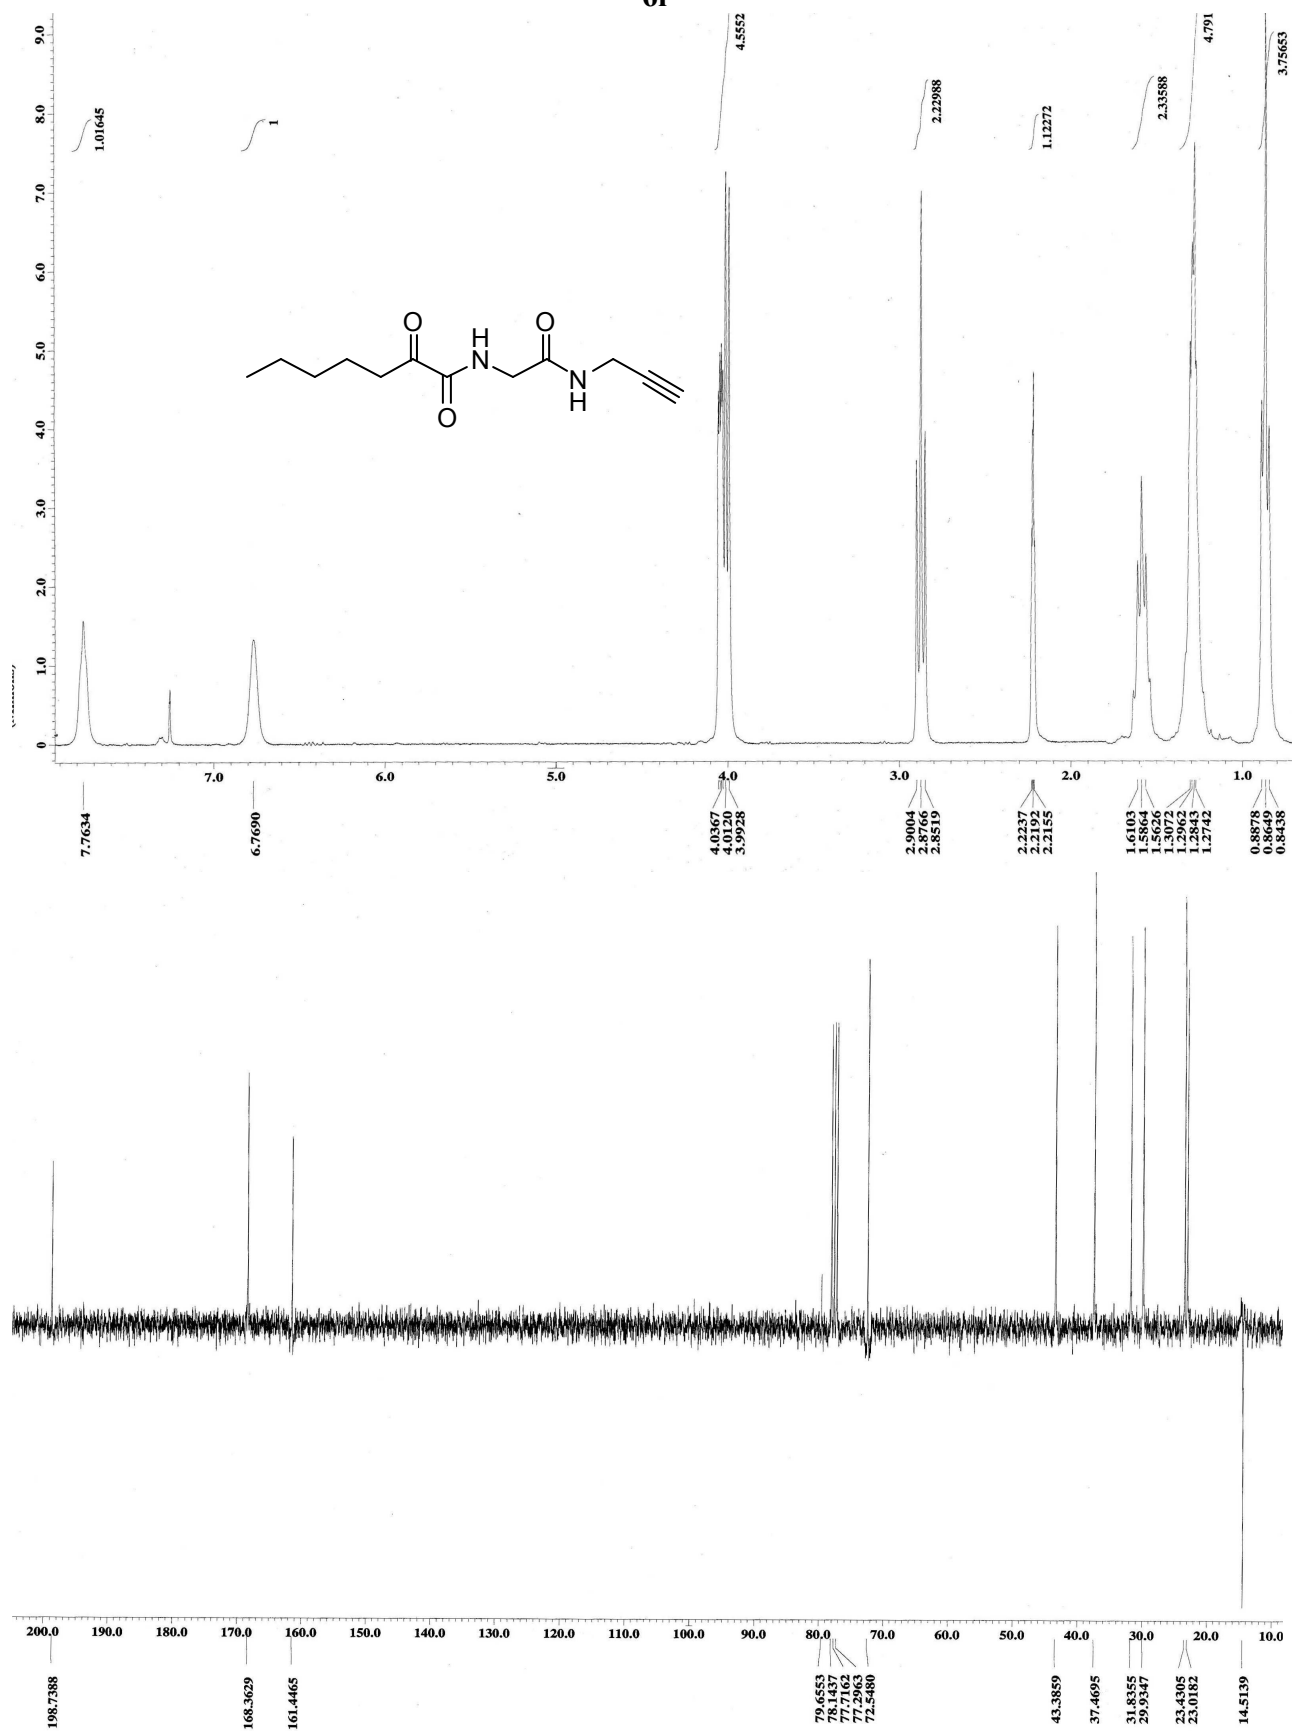

6j

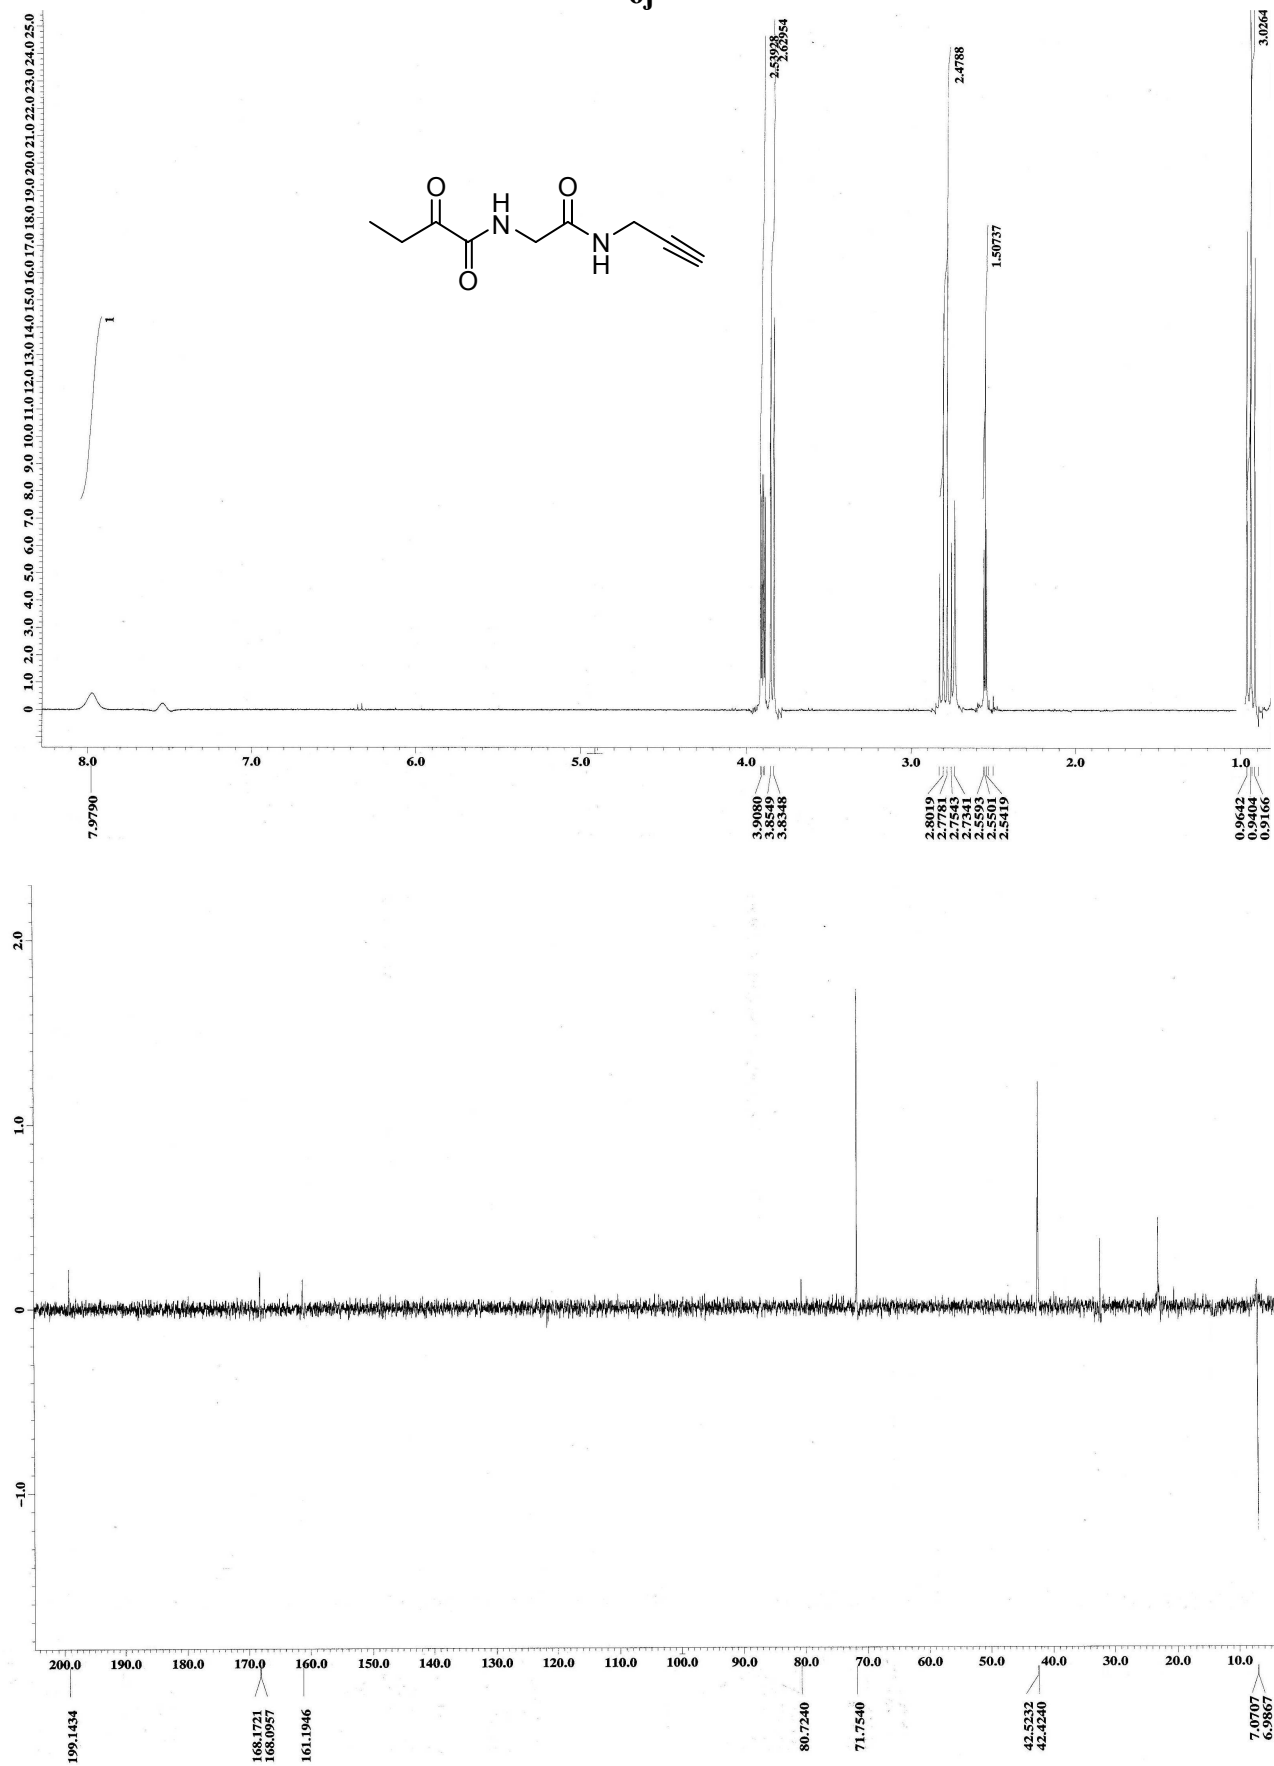

6k

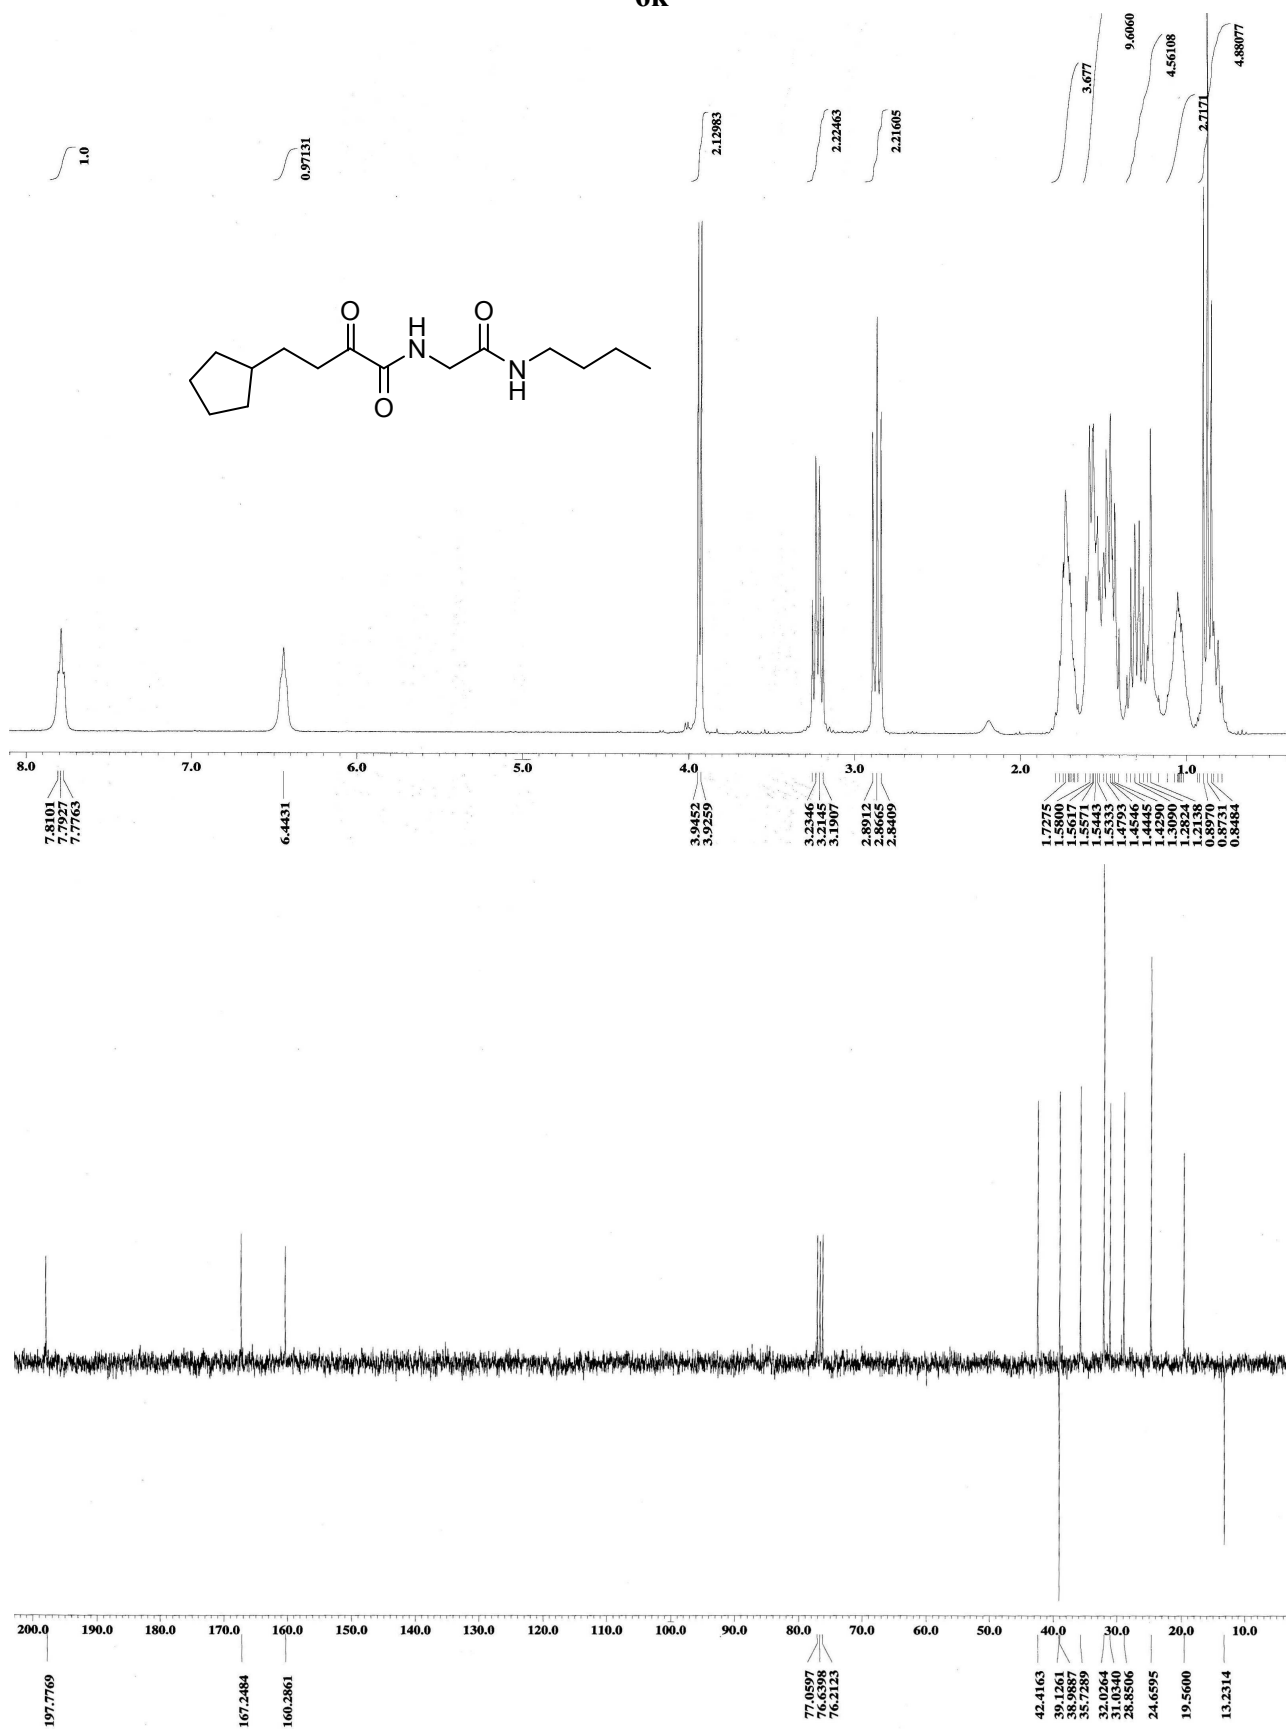

6l

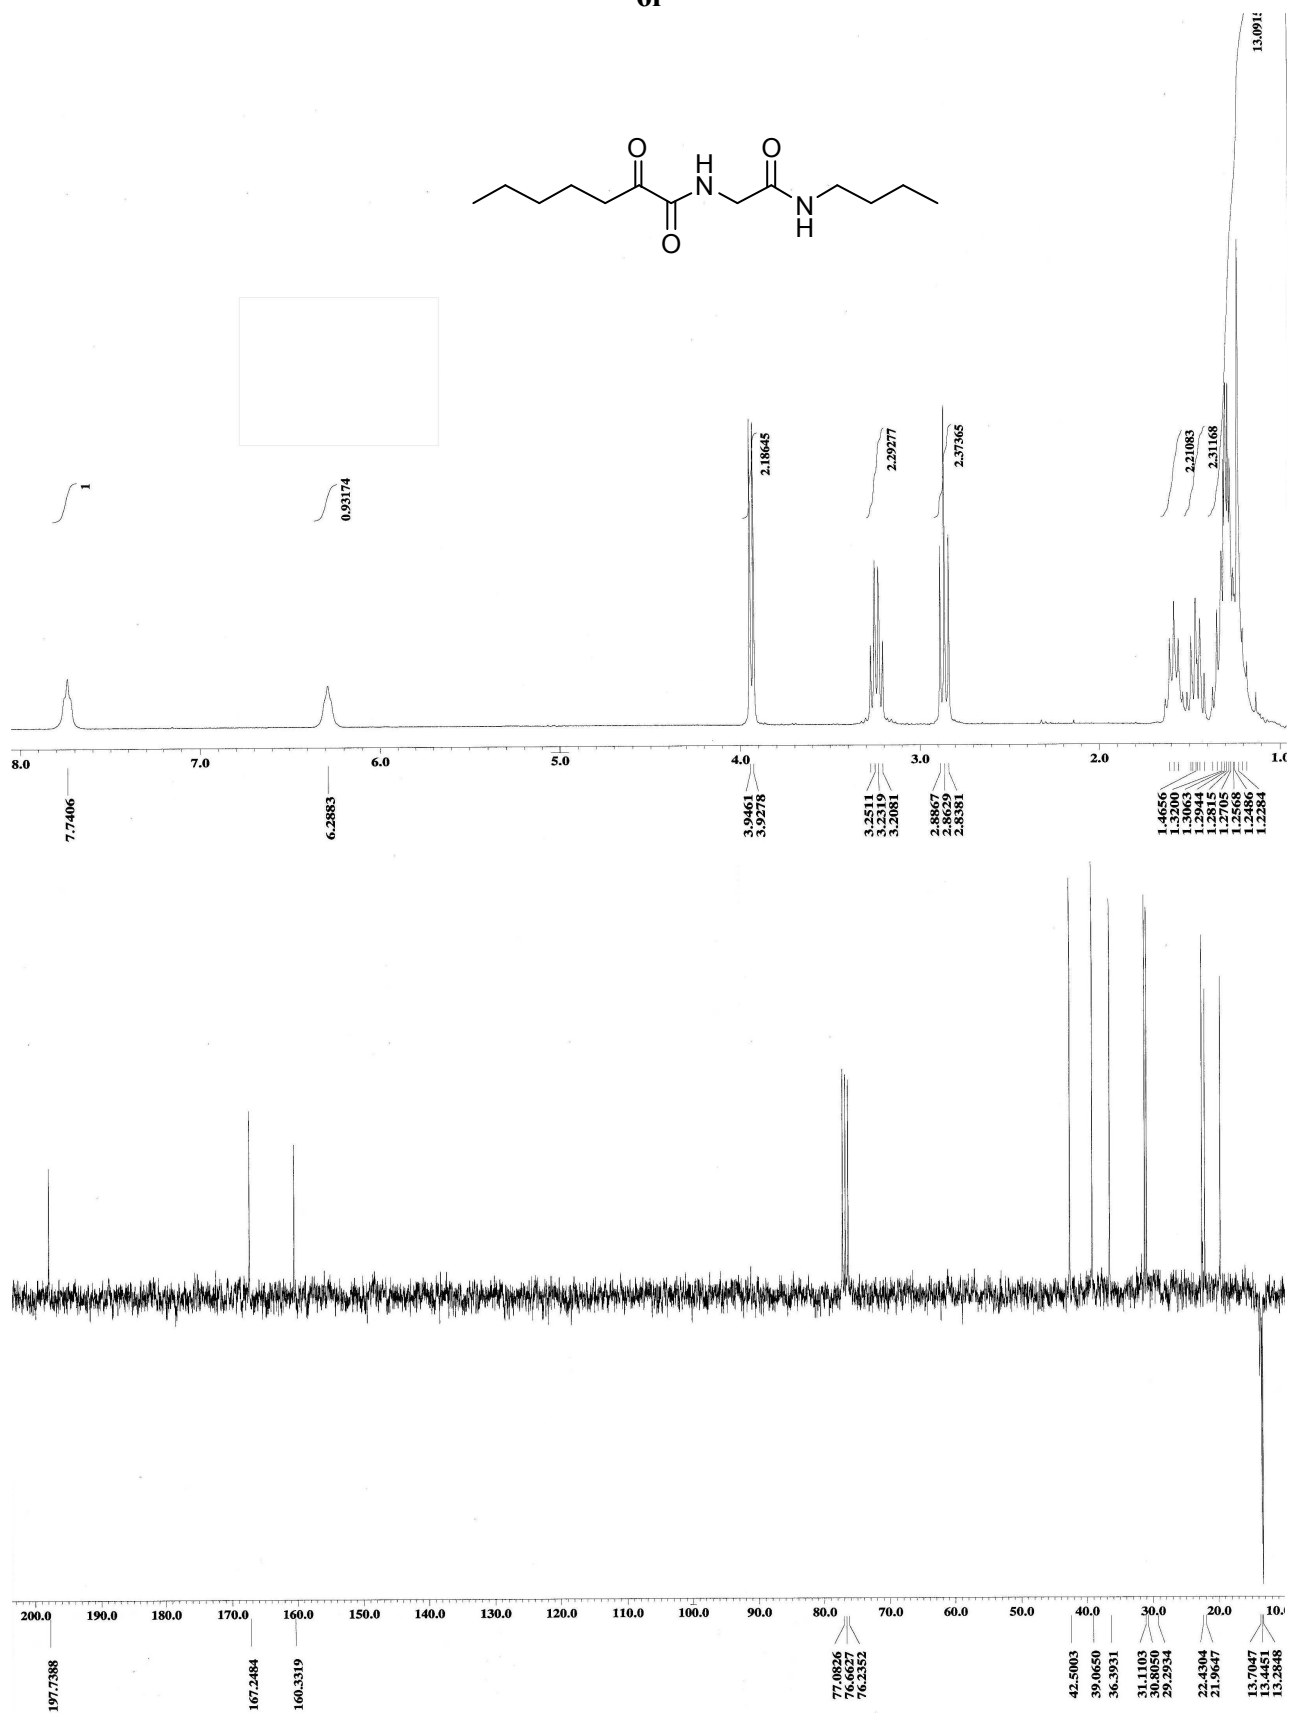

6m

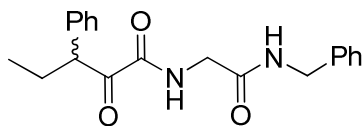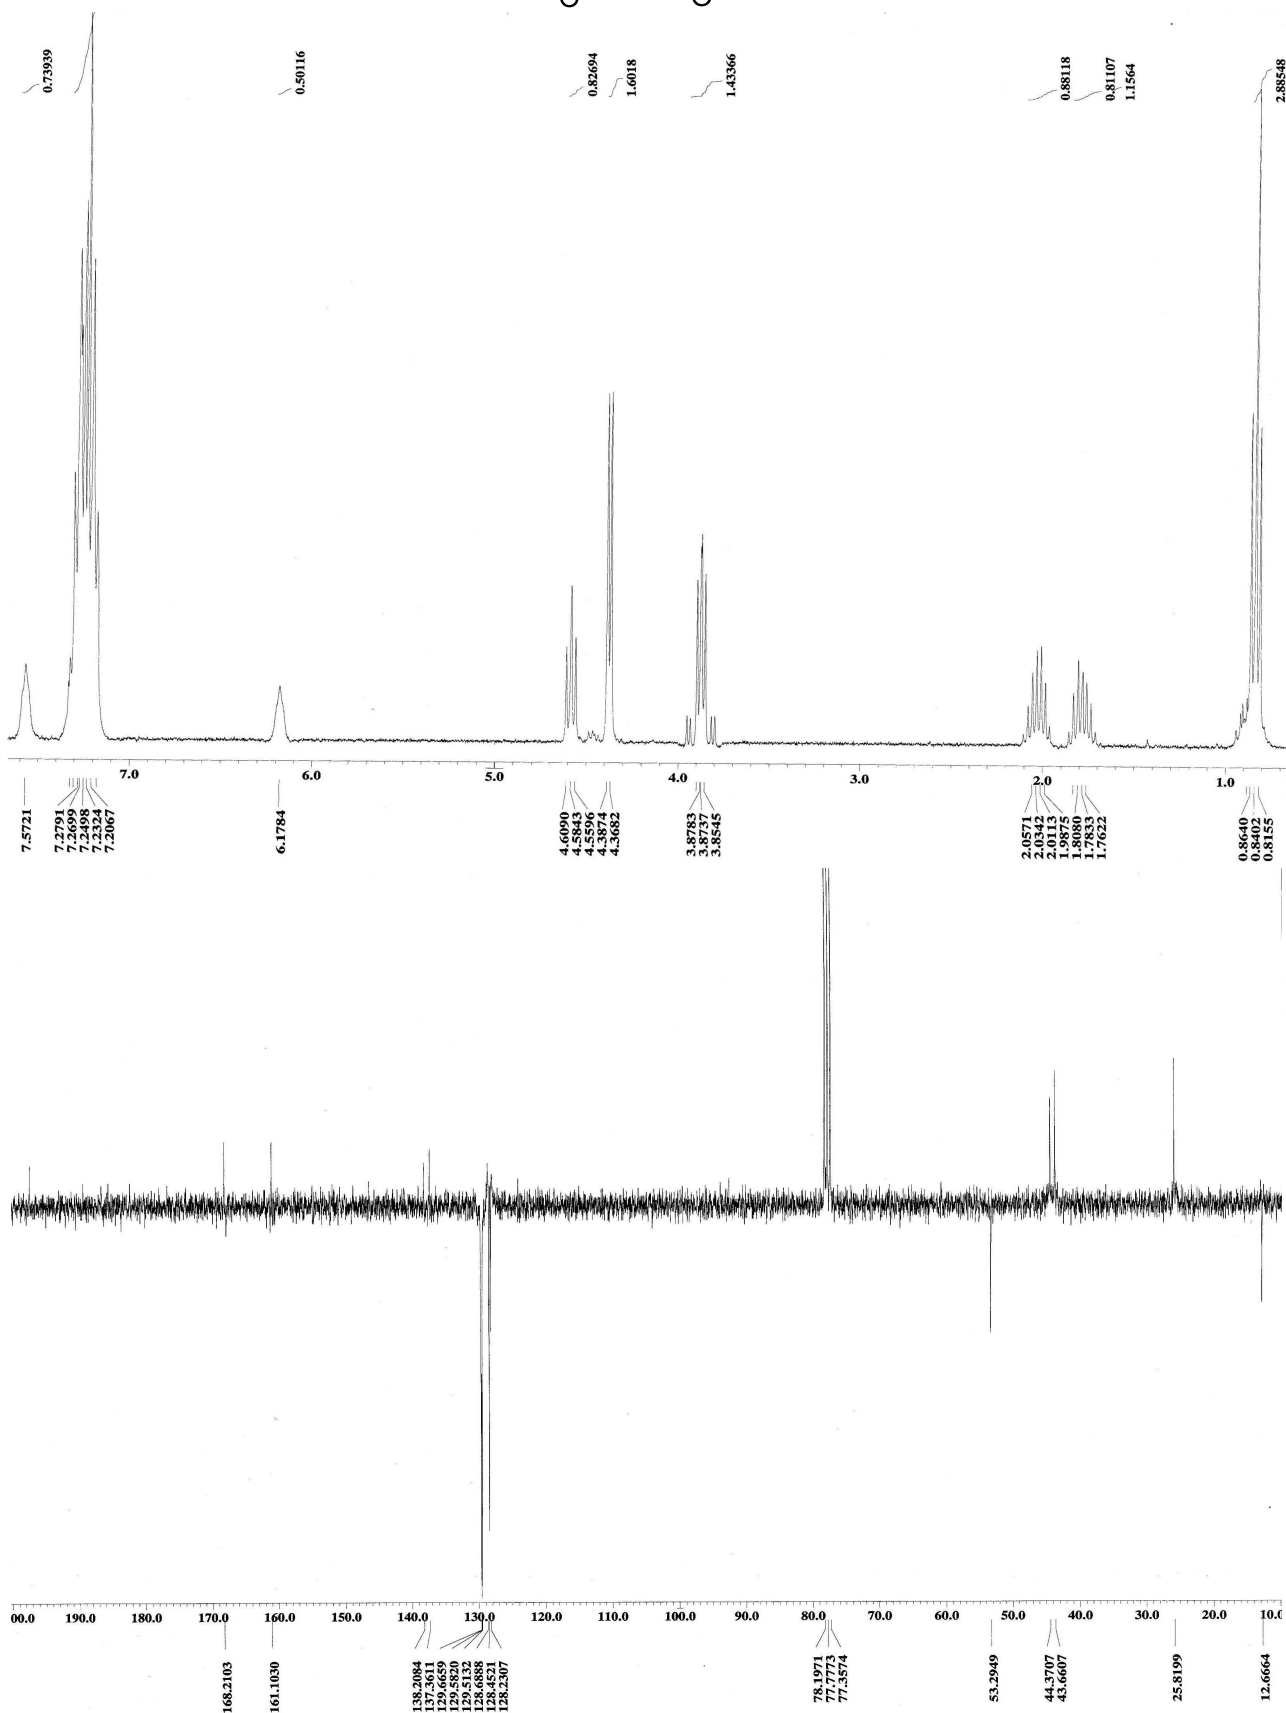

7

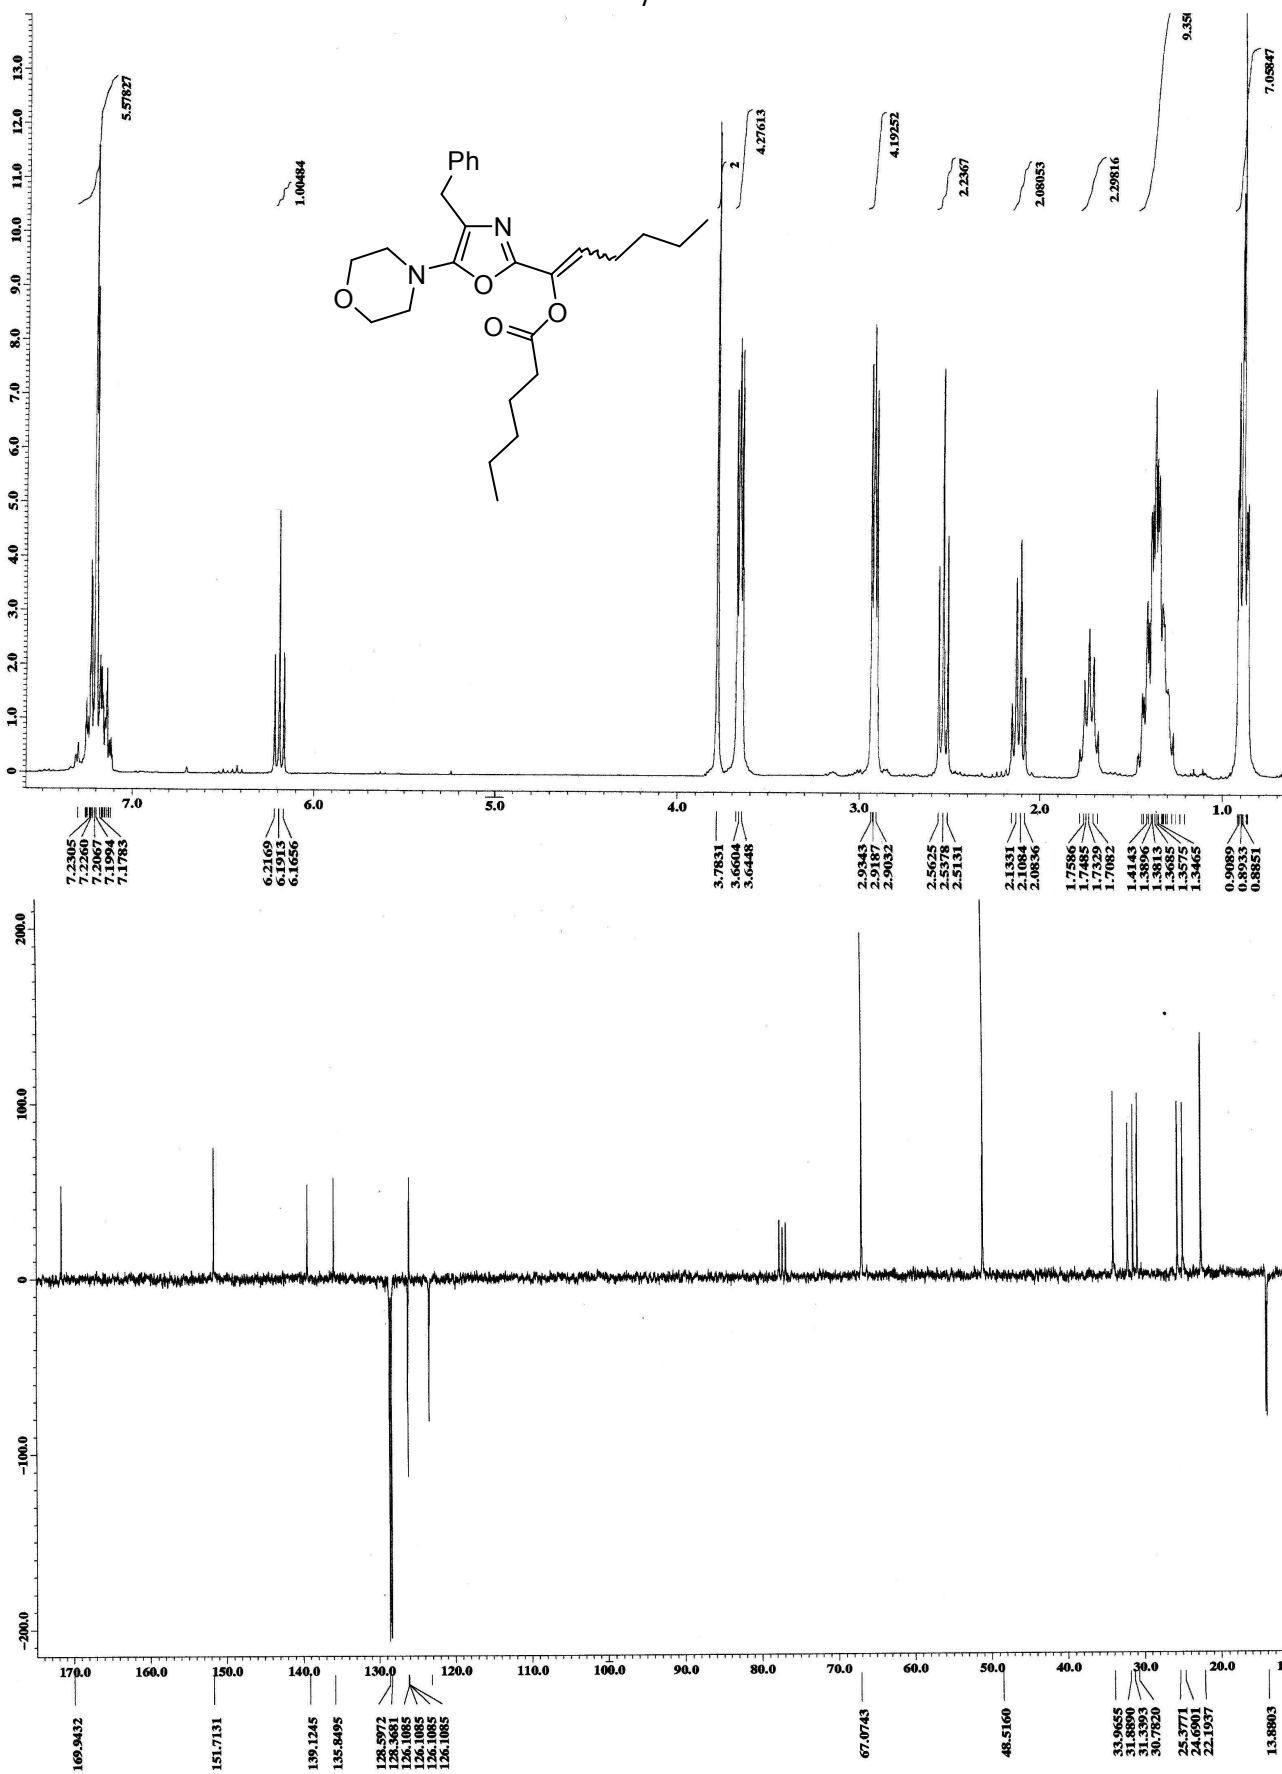



**Table of elemental analyses for all target compounds**

| Compound  | Formula                                                       | Calculated |      |       | Obtained |      |       |
|-----------|---------------------------------------------------------------|------------|------|-------|----------|------|-------|
|           |                                                               | % C        | %H   | %N    | %C       | %H   | %N    |
| <b>6a</b> | C <sub>20</sub> H <sub>28</sub> N <sub>2</sub> O <sub>4</sub> | 66,64      | 7,83 | 7,77  | 66,70    | 7,91 | 7,68  |
| <b>6b</b> | C <sub>23</sub> H <sub>26</sub> N <sub>2</sub> O <sub>4</sub> | 70,03      | 6,64 | 7,10  | 69,88    | 6,49 | 7,38  |
| <b>6c</b> | C <sub>17</sub> H <sub>22</sub> N <sub>2</sub> O <sub>4</sub> | 64,13      | 6,96 | 8,80  | 64,25    | 7,05 | 8,93  |
| <b>6d</b> | C <sub>20</sub> H <sub>26</sub> N <sub>2</sub> O <sub>3</sub> | 70,15      | 7,65 | 8,18  | 70,23    | 7,48 | 8,25  |
| <b>6e</b> | C <sub>21</sub> H <sub>24</sub> N <sub>2</sub> O <sub>3</sub> | 71,57      | 6,86 | 7,95  | 71,68    | 6,91 | 8,05  |
| <b>6f</b> | C <sub>14</sub> H <sub>18</sub> N <sub>2</sub> O <sub>3</sub> | 64,10      | 6,92 | 10,68 | 64,45    | 7,02 | 10,79 |
| <b>6g</b> | C <sub>18</sub> H <sub>24</sub> N <sub>2</sub> O <sub>3</sub> | 68,33      | 7,64 | 8,85  | 68,51    | 7,73 | 8,99  |
| <b>6h</b> | C <sub>16</sub> H <sub>22</sub> N <sub>2</sub> O <sub>3</sub> | 66,18      | 7,64 | 9,65  | 66,25    | 7,81 | 9,78  |
| <b>6i</b> | C <sub>12</sub> H <sub>18</sub> N <sub>2</sub> O <sub>3</sub> | 60,49      | 7,61 | 11,76 | 60,31    | 7,58 | 11,58 |
| <b>6j</b> | C <sub>9</sub> H <sub>12</sub> N <sub>2</sub> O <sub>3</sub>  | 55,09      | 6,16 | 14,28 | 54,98    | 6,02 | 13,98 |
| <b>6k</b> | C <sub>15</sub> H <sub>26</sub> N <sub>2</sub> O <sub>3</sub> | 63,80      | 9,28 | 9,92  | 63,94    | 9,52 | 9,81  |
| <b>6l</b> | C <sub>13</sub> H <sub>24</sub> N <sub>2</sub> O <sub>3</sub> | 60,91      | 9,44 | 10,93 | 60,88    | 9,41 | 10,88 |
| <b>6m</b> | C <sub>20</sub> H <sub>22</sub> N <sub>2</sub> O <sub>3</sub> | 70,98      | 6,55 | 8,28  | 70,75    | 6,38 | 8,10  |
